# Supplementary material for: Antimicrobial Indole-3-Carboxamido-Polyamine Conjugates Target Bacterial Membranes and Are Antibiotic Potentiators
Source: MDPI journal article supplement (doi:10.3390/biom14030261), 2024-02-22
Supplement: s1 [file s1]

# Supplementary File

## Indole-3-carboxamido-Polyamine Conjugates Target Bacterial Membranes and are Antimicrobial and Antibiotic Potentiators

Kenneth Sue <sup>1</sup>, Melissa M. Cadelis <sup>1,2</sup>, Florent Rouvier <sup>3</sup>, Marie-Lise Bourguet-Kondracki <sup>4</sup>, Jean Michel Brunel <sup>3</sup> and Brent R. Copp <sup>1,\*</sup>

<sup>1</sup> School of Chemical Sciences, The University of Auckland, Private Bag 92019, Auckland 1142, New Zealand

<sup>2</sup> School of Medical Sciences, The University of Auckland, Private Bag 92019, Auckland 1142, New Zealand

<sup>3</sup> Membranes et Cibles Thérapeutiques, INSERM, Aix-Marseille Université, 27 bd Jean Moulin, 13385 Marseille, France

<sup>4</sup> Laboratoire Molécules de Communication et Adaptation des Micro-organismes, UMR 7245 CNRS, Muséum National d'Histoire Naturelle, 57 rue Cuvier (C.P. 54), 75005 Paris, France

\* Correspondence: b.copp@auckland.ac.nz

### Contents

|                                                                                                                                             |            |
|---------------------------------------------------------------------------------------------------------------------------------------------|------------|
| <b>Figure S1</b> <sup>1</sup> H (CD <sub>3</sub> OD, 400 MHz) and <sup>13</sup> C (CD <sub>3</sub> OD, 100 MHz) NMR spectra for <b>12a</b>  | <b>S3</b>  |
| <b>Figure S2</b> <sup>1</sup> H (CD <sub>3</sub> OD, 400 MHz) and <sup>13</sup> C (CD <sub>3</sub> OD, 100 MHz) NMR spectra for <b>12b</b>  | <b>S4</b>  |
| <b>Figure S3</b> <sup>1</sup> H (CD <sub>3</sub> OD, 400 MHz) and <sup>13</sup> C (CD <sub>3</sub> OD, 100 MHz) NMR spectra for <b>12c</b>  | <b>S5</b>  |
| <b>Figure S4</b> <sup>1</sup> H (CD <sub>3</sub> OD, 400 MHz) and <sup>13</sup> C (CD <sub>3</sub> OD, 100 MHz) NMR spectra for <b>12d</b>  | <b>S6</b>  |
| <b>Figure S5</b> <sup>1</sup> H (CD <sub>3</sub> OD, 400 MHz) and <sup>13</sup> C (CD <sub>3</sub> OD, 100 MHz) NMR spectra for <b>12e</b>  | <b>S7</b>  |
| <b>Figure S6</b> <sup>1</sup> H (CD <sub>3</sub> OD, 400 MHz) and <sup>13</sup> C (CD <sub>3</sub> OD, 100 MHz) NMR spectra for <b>12f</b>  | <b>S8</b>  |
| <b>Figure S7</b> <sup>1</sup> H (CD <sub>3</sub> OD, 400 MHz) and <sup>13</sup> C (CD <sub>3</sub> OD, 100 MHz) NMR spectra for <b>13b</b>  | <b>S9</b>  |
| <b>Figure S8</b> <sup>1</sup> H (CD <sub>3</sub> OD, 400 MHz) and <sup>13</sup> C (CD <sub>3</sub> OD, 100 MHz) NMR spectra for <b>13c</b>  | <b>S10</b> |
| <b>Figure S9</b> <sup>1</sup> H (CD <sub>3</sub> OD, 400 MHz) and <sup>13</sup> C (CD <sub>3</sub> OD, 100 MHz) NMR spectra for <b>13d</b>  | <b>S11</b> |
| <b>Figure S10</b> <sup>1</sup> H (CD <sub>3</sub> OD, 400 MHz) and <sup>13</sup> C (CD <sub>3</sub> OD, 100 MHz) NMR spectra for <b>13e</b> | <b>S12</b> |
| <b>Figure S11</b> <sup>1</sup> H (CD <sub>3</sub> OD, 400 MHz) and <sup>13</sup> C (CD <sub>3</sub> OD, 100 MHz) NMR spectra for <b>13f</b> | <b>S13</b> |
| <b>Figure S12</b> <sup>1</sup> H (CD <sub>3</sub> OD, 400 MHz) and <sup>13</sup> C (CD <sub>3</sub> OD, 100 MHz) NMR spectra for <b>14a</b> | <b>S14</b> |
| <b>Figure S13</b> <sup>1</sup> H (CD <sub>3</sub> OD, 400 MHz) and <sup>13</sup> C (CD <sub>3</sub> OD, 100 MHz) NMR spectra for <b>14b</b> | <b>S15</b> |
| <b>Figure S14</b> <sup>1</sup> H (CD <sub>3</sub> OD, 400 MHz) and <sup>13</sup> C (CD <sub>3</sub> OD, 100 MHz) NMR spectra for <b>14c</b> | <b>S16</b> |
| <b>Figure S15</b> <sup>1</sup> H (CD <sub>3</sub> OD, 400 MHz) and <sup>13</sup> C (CD <sub>3</sub> OD, 100 MHz) NMR spectra for <b>14d</b> | <b>S17</b> |
| <b>Figure S16</b> <sup>1</sup> H (CD <sub>3</sub> OD, 400 MHz) and <sup>13</sup> C (CD <sub>3</sub> OD, 100 MHz) NMR spectra for <b>14e</b> | <b>S18</b> |
| <b>Figure S17</b> <sup>1</sup> H (CD <sub>3</sub> OD, 400 MHz) and <sup>13</sup> C (CD <sub>3</sub> OD, 100 MHz) NMR spectra for <b>14f</b> | <b>S19</b> |
| <b>Figure S18</b> <sup>1</sup> H (CD <sub>3</sub> OD, 400 MHz) and <sup>13</sup> C (CD <sub>3</sub> OD, 100 MHz) NMR spectra for <b>15a</b> | <b>S20</b> |



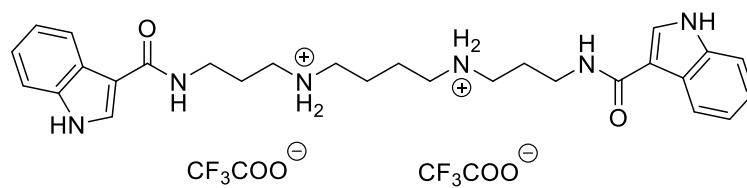

$^1\text{H}$  NMR ( $\text{CD}_3\text{OD}$ , 400 MHz):

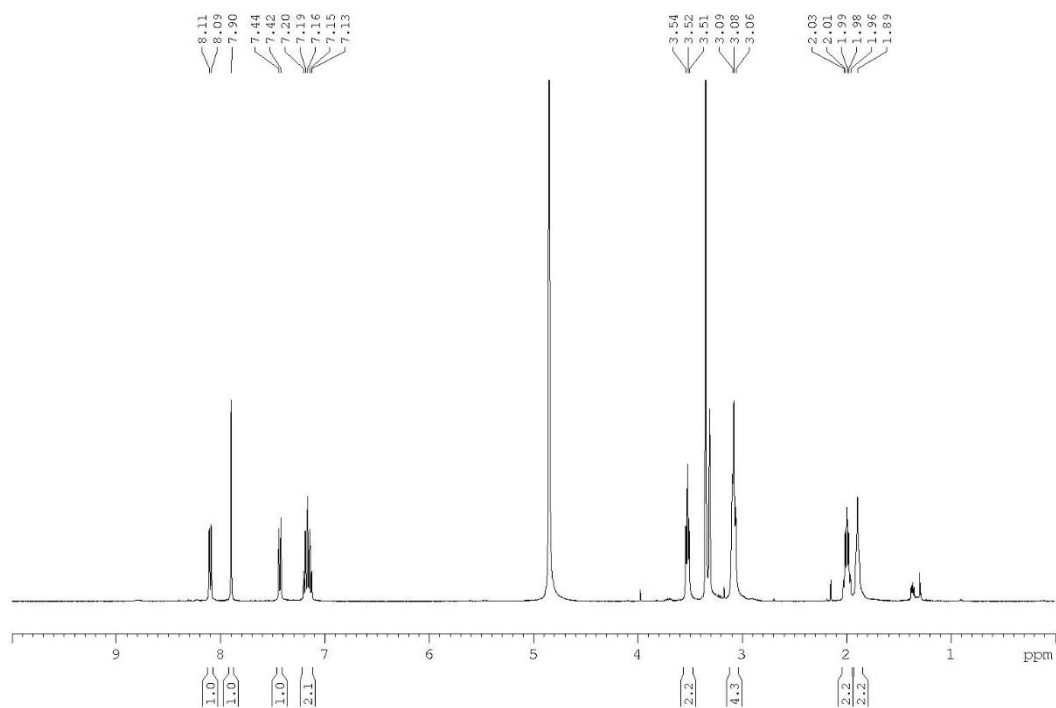

$^{13}\text{C}$  NMR ( $\text{CD}_3\text{OD}$ , 100 MHz):

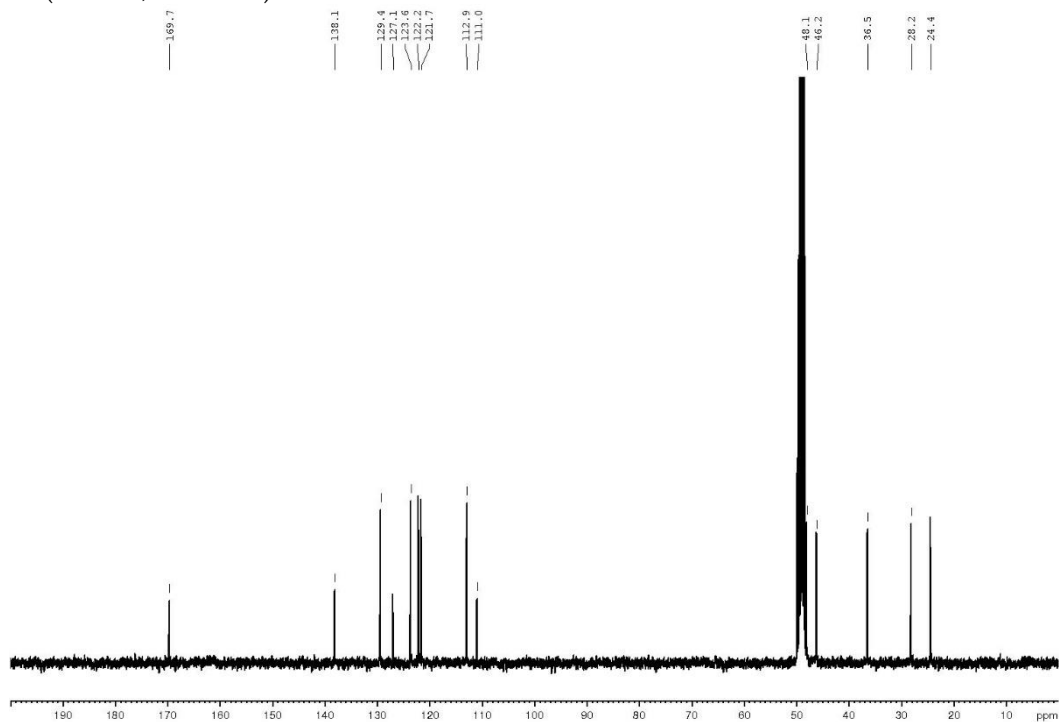

**Figure S1**  $^1\text{H}$  ( $\text{CD}_3\text{OD}$ , 400 MHz) and  $^{13}\text{C}$  ( $\text{CD}_3\text{OD}$ , 100 MHz) NMR spectra for **12a**

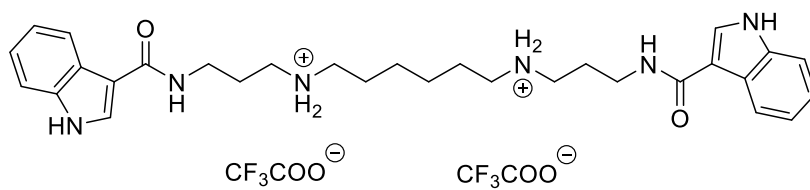

$^1\text{H}$  NMR ( $\text{CD}_3\text{OD}$ , 400 MHz):

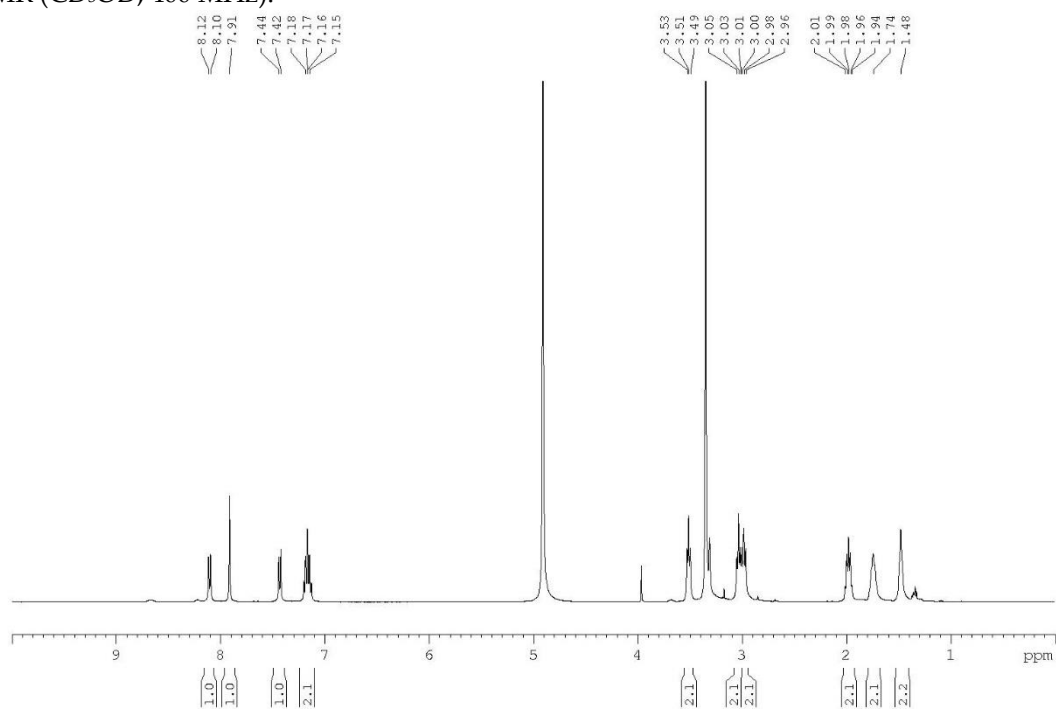

$^{13}\text{C}$  NMR ( $\text{CD}_3\text{OD}$ , 100 MHz):

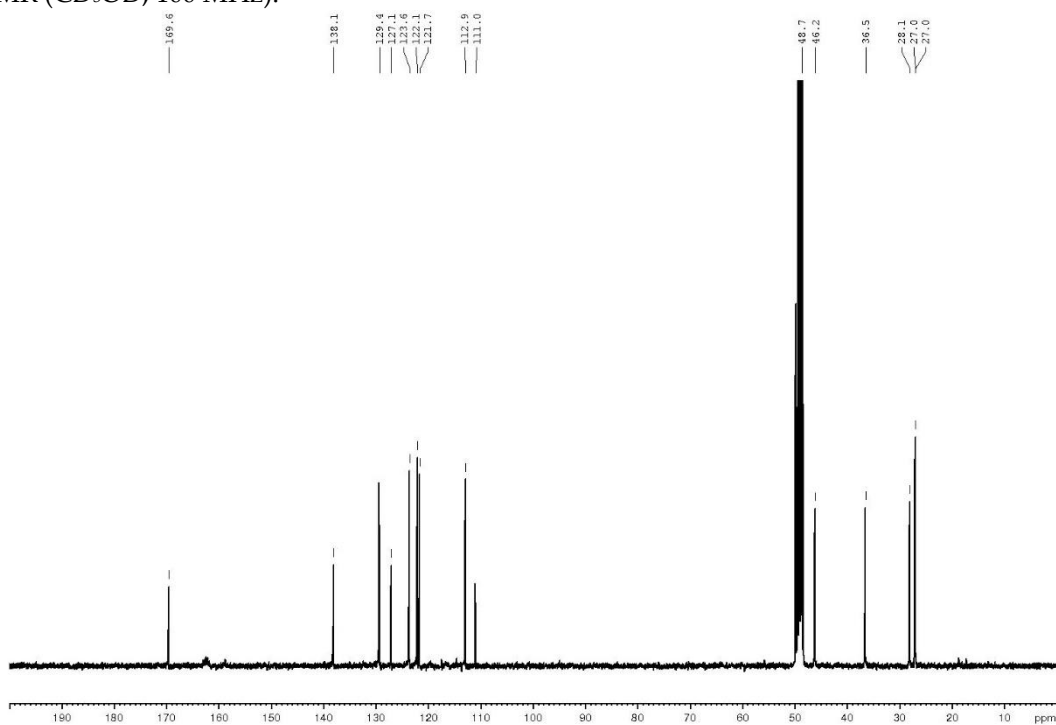

**Figure S2**  $^1\text{H}$  ( $\text{CD}_3\text{OD}$ , 400 MHz) and  $^{13}\text{C}$  ( $\text{CD}_3\text{OD}$ , 100 MHz) NMR spectra for **12b**

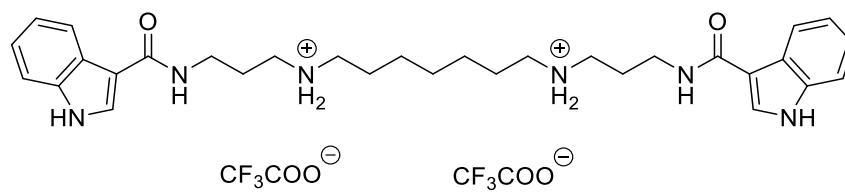

$^1\text{H}$  NMR ( $\text{CD}_3\text{OD}$ , 400 MHz):

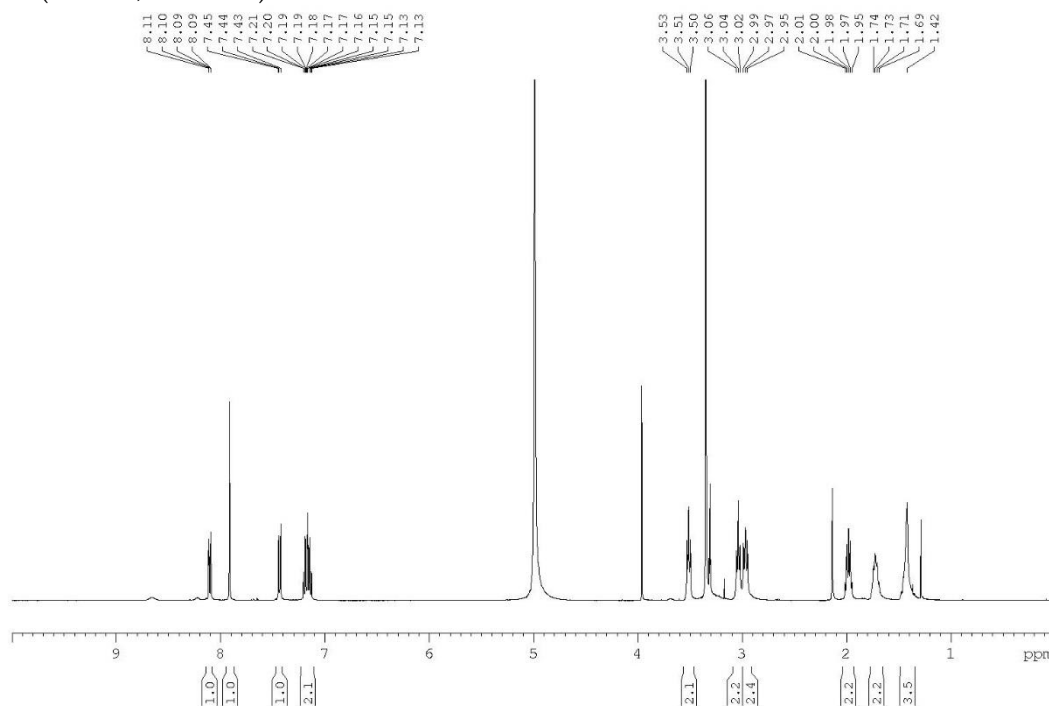

$^{13}\text{C}$  NMR ( $\text{CD}_3\text{OD}$ , 100 MHz):

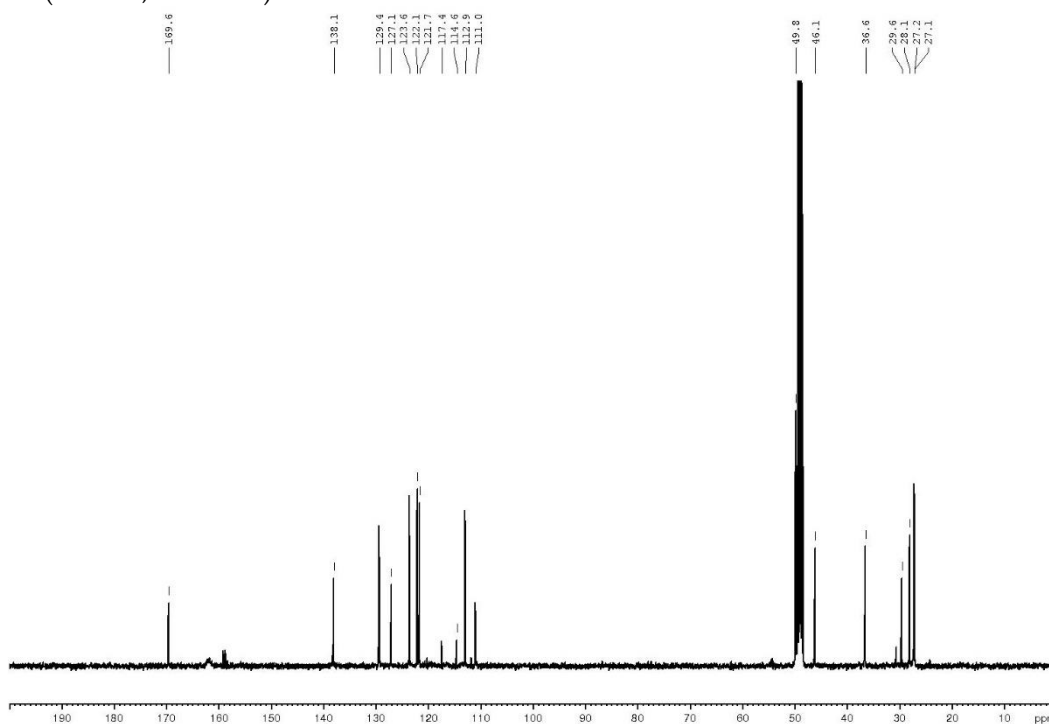

**Figure S3**  $^1\text{H}$  ( $\text{CD}_3\text{OD}$ , 400 MHz) and  $^{13}\text{C}$  ( $\text{CD}_3\text{OD}$ , 100 MHz) NMR spectra for **12c**

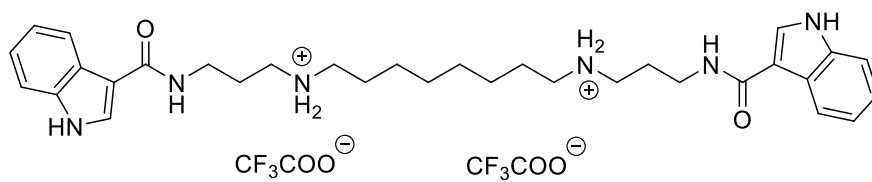

$^1\text{H}$  NMR ( $\text{CD}_3\text{OD}$ , 400 MHz):

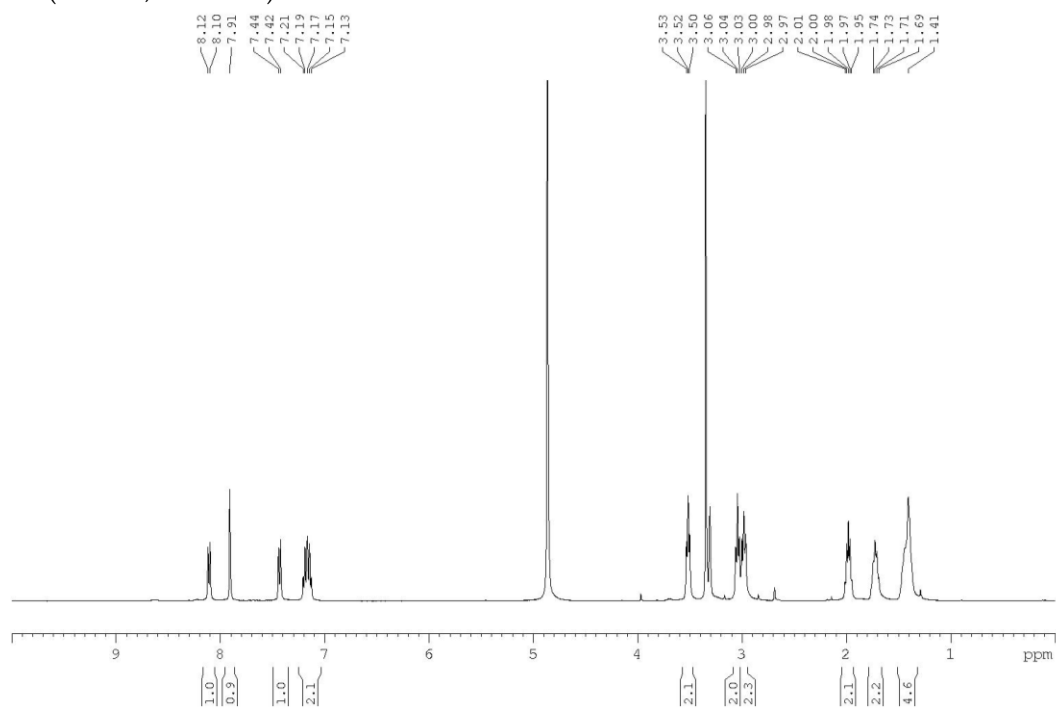

$^{13}\text{C}$  NMR ( $\text{CD}_3\text{OD}$ , 100 MHz):

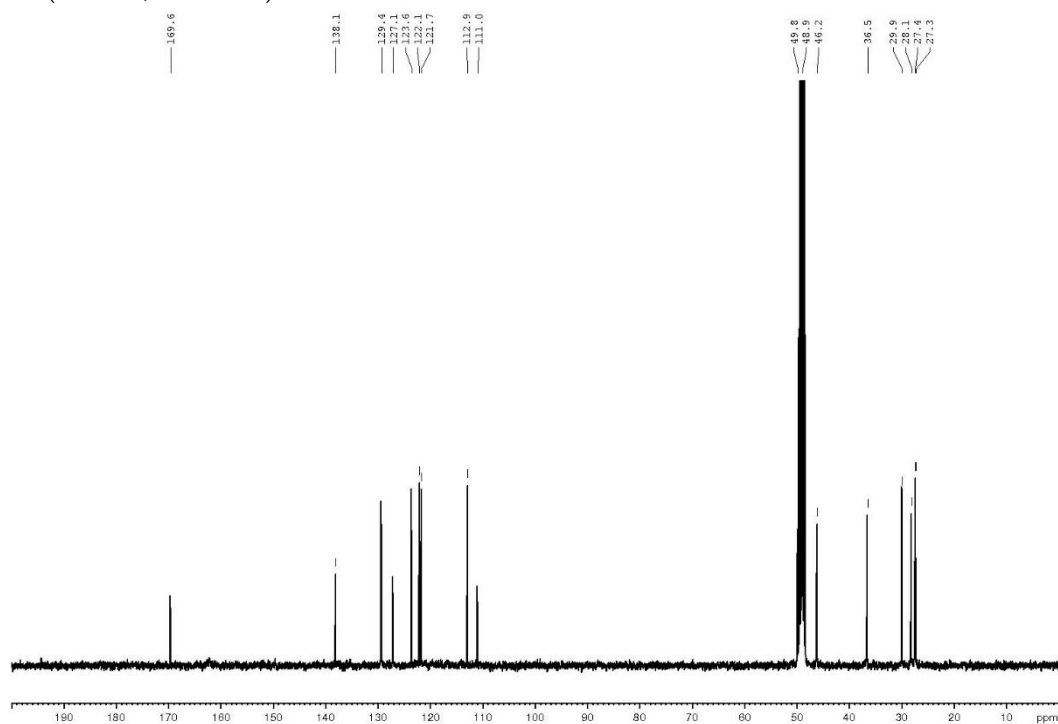

**Figure S4**  $^1\text{H}$  ( $\text{CD}_3\text{OD}$ , 400 MHz) and  $^{13}\text{C}$  ( $\text{CD}_3\text{OD}$ , 100 MHz) NMR spectra for **12d**

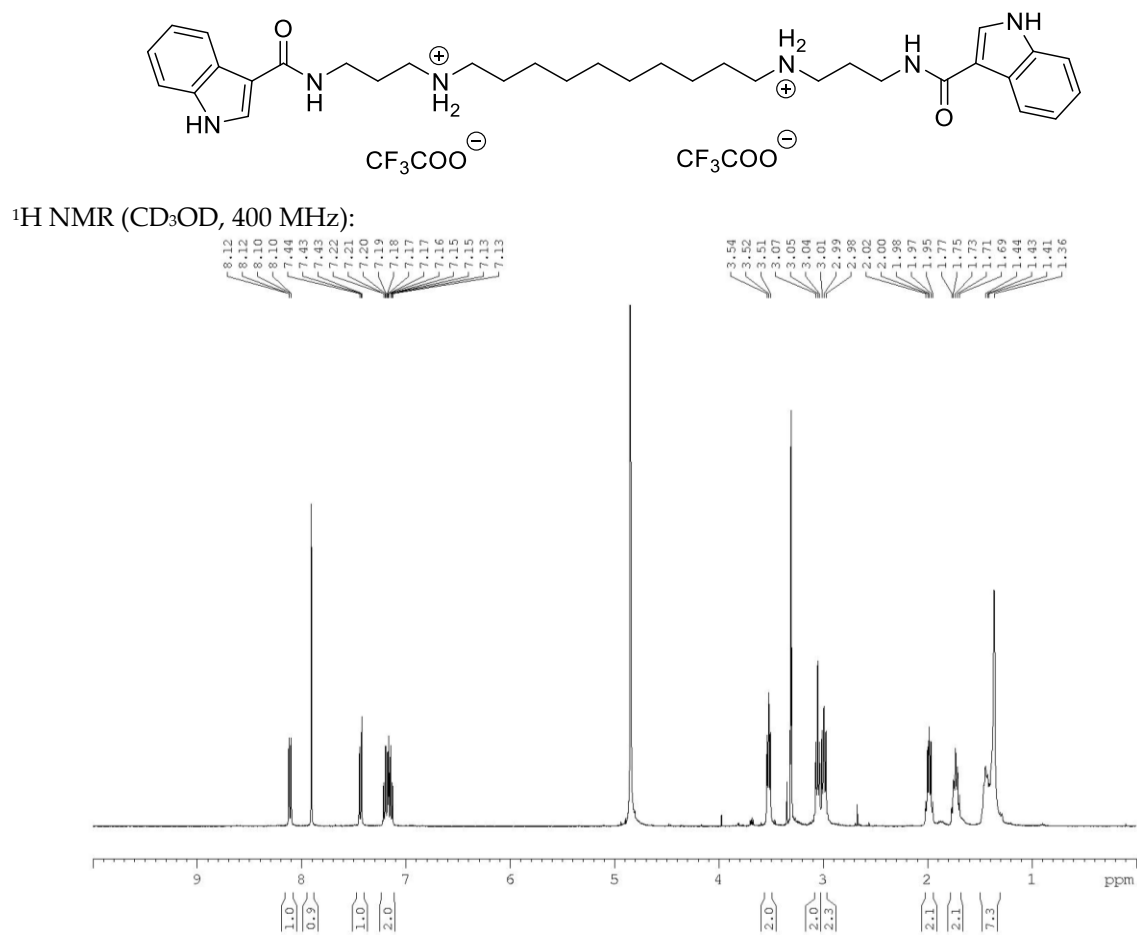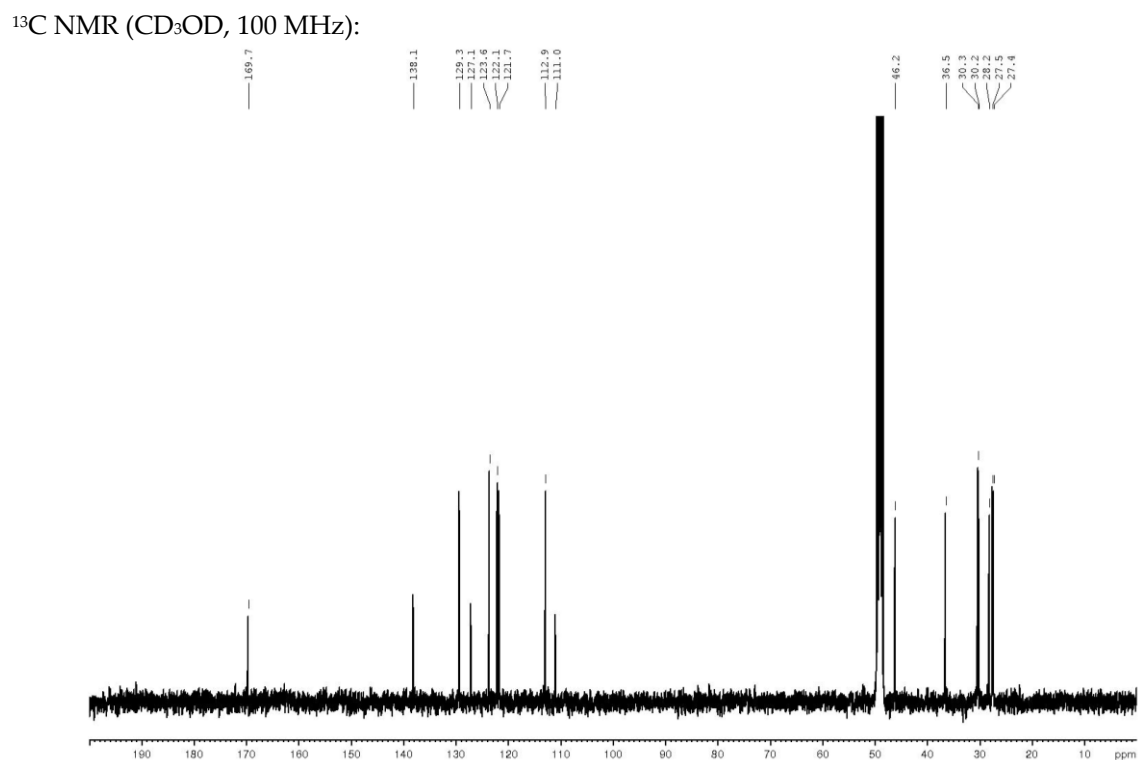

**Figure S5**  $^1\text{H}$  ( $\text{CD}_3\text{OD}$ , 400 MHz) and  $^{13}\text{C}$  ( $\text{CD}_3\text{OD}$ , 100 MHz) NMR spectra for **12e**

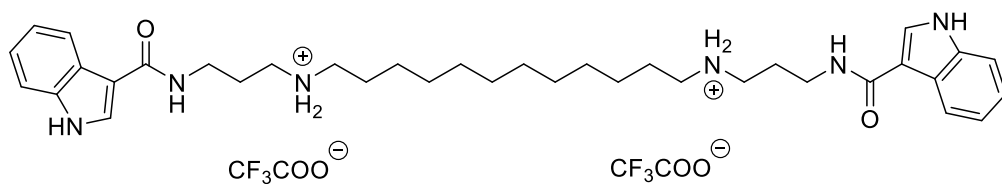

$^1\text{H}$  NMR ( $\text{CD}_3\text{OD}$ , 400 MHz):

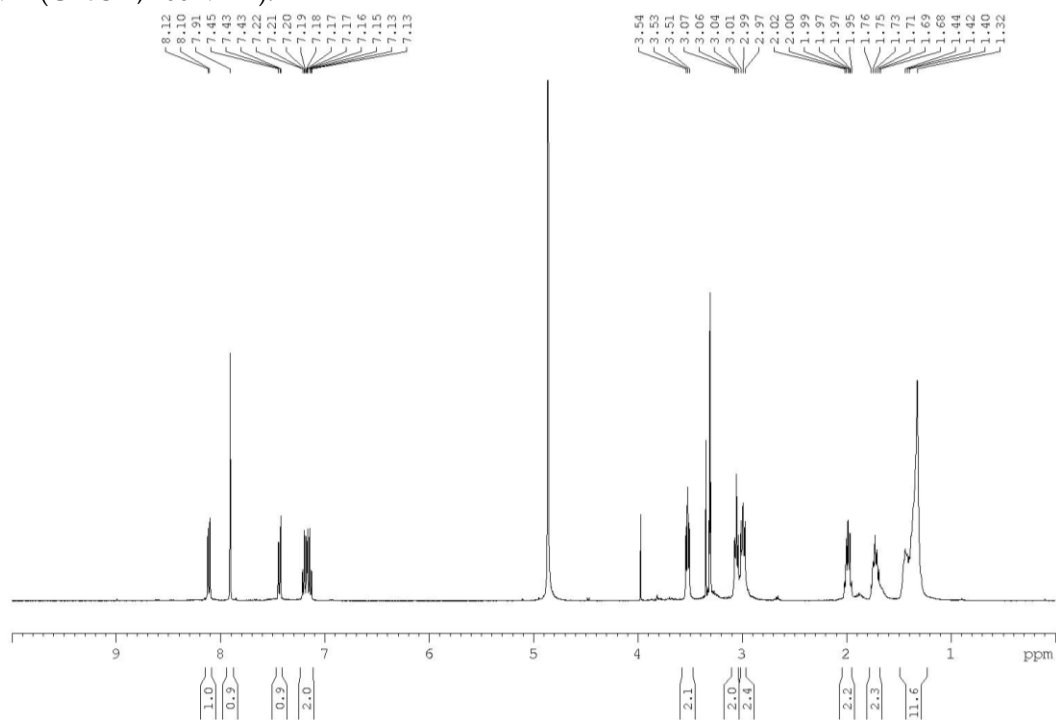

$^{13}\text{C}$  NMR ( $\text{CD}_3\text{OD}$ , 100 MHz):

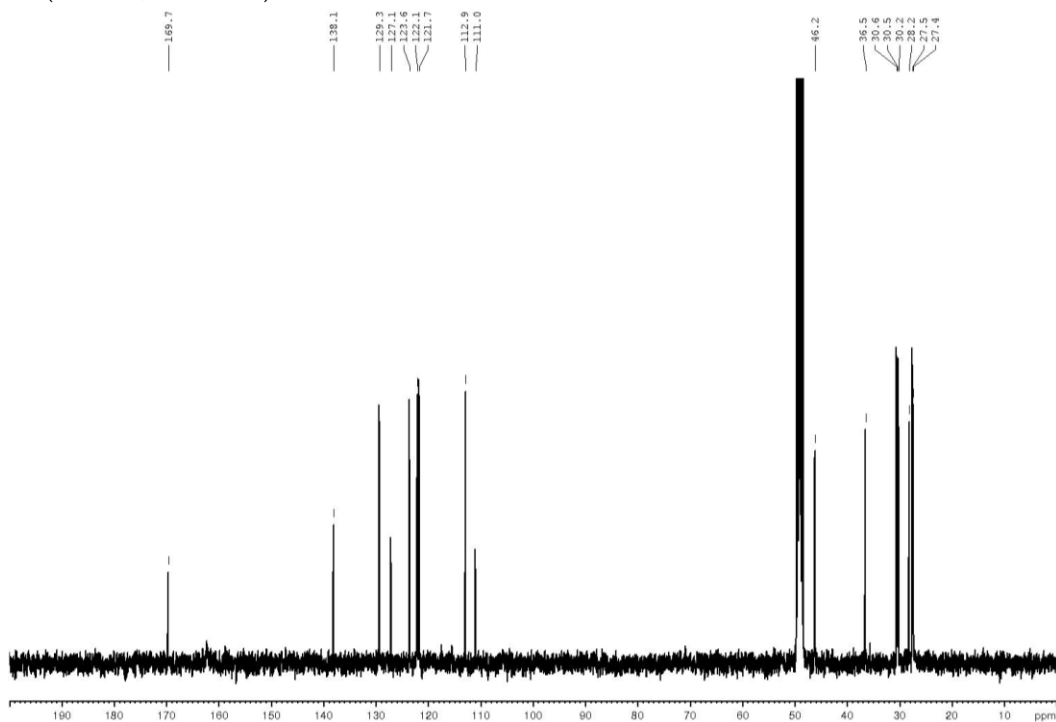

Figure S6  $^1\text{H}$  ( $\text{CD}_3\text{OD}$ , 400 MHz) and  $^{13}\text{C}$  ( $\text{CD}_3\text{OD}$ , 100 MHz) NMR spectra for 12f



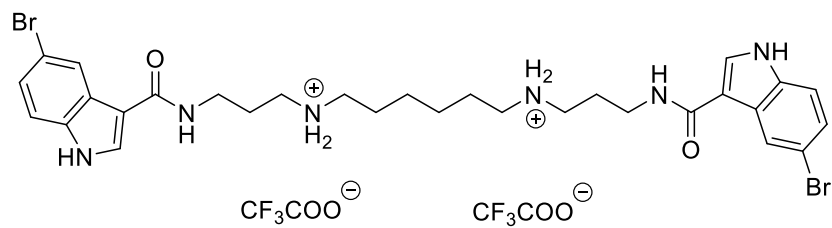

$^1\text{H}$  NMR ( $\text{CD}_3\text{OD}$ , 400 MHz):

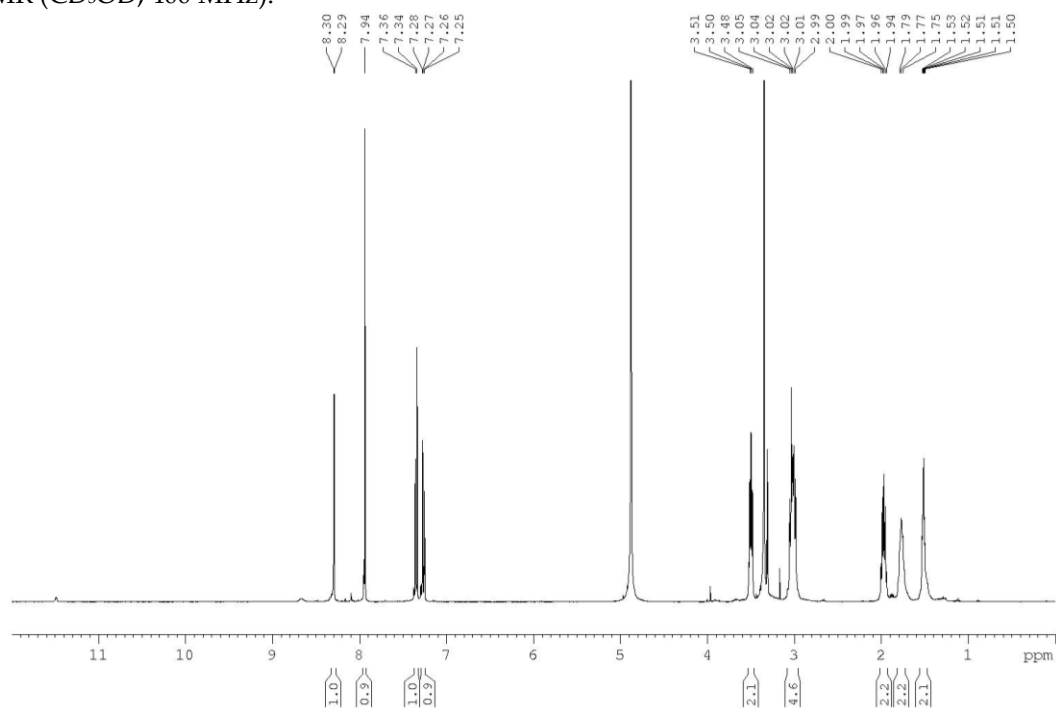

$^{13}\text{C}$  NMR ( $\text{CD}_3\text{OD}$ , 100 MHz):

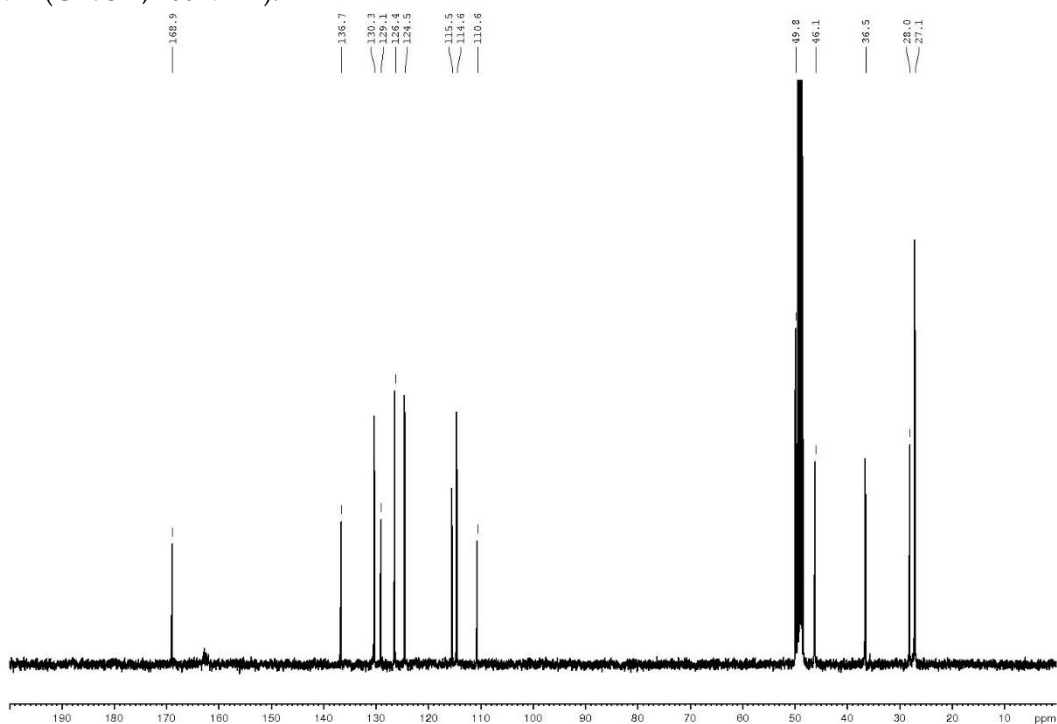

**Figure S7**  $^1\text{H}$  ( $\text{CD}_3\text{OD}$ , 400 MHz) and  $^{13}\text{C}$  ( $\text{CD}_3\text{OD}$ , 100 MHz) NMR spectra for **13b**

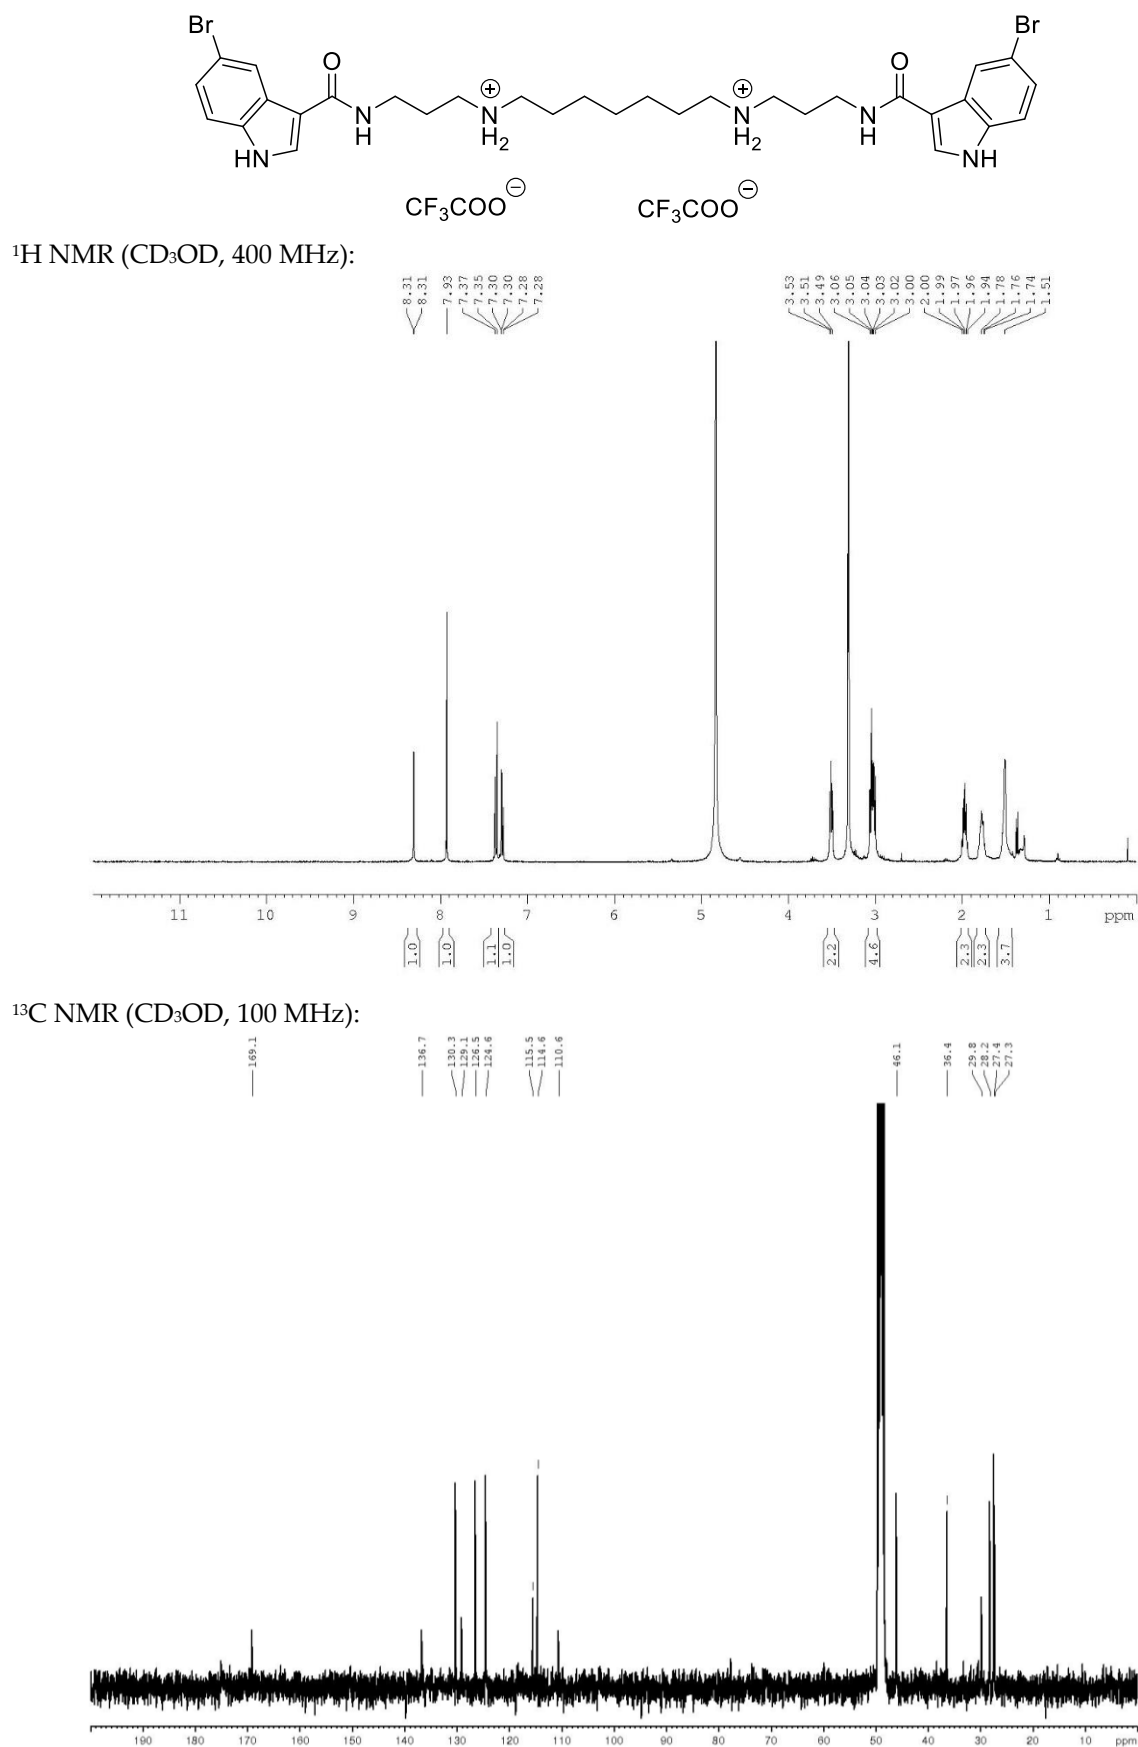

**Figure S8** <sup>1</sup>H (CD<sub>3</sub>OD, 400 MHz) and <sup>13</sup>C (CD<sub>3</sub>OD, 100 MHz) NMR spectra for **13c**

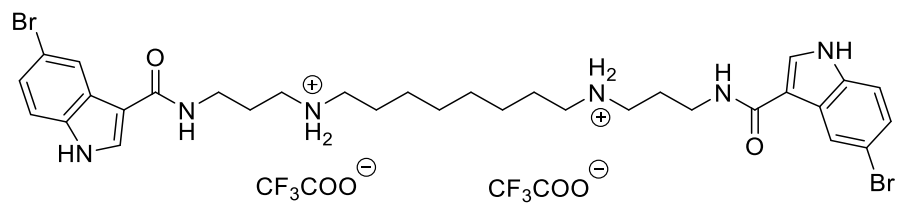

$^1\text{H}$  NMR ( $\text{CD}_3\text{OD}$ , 400 MHz):

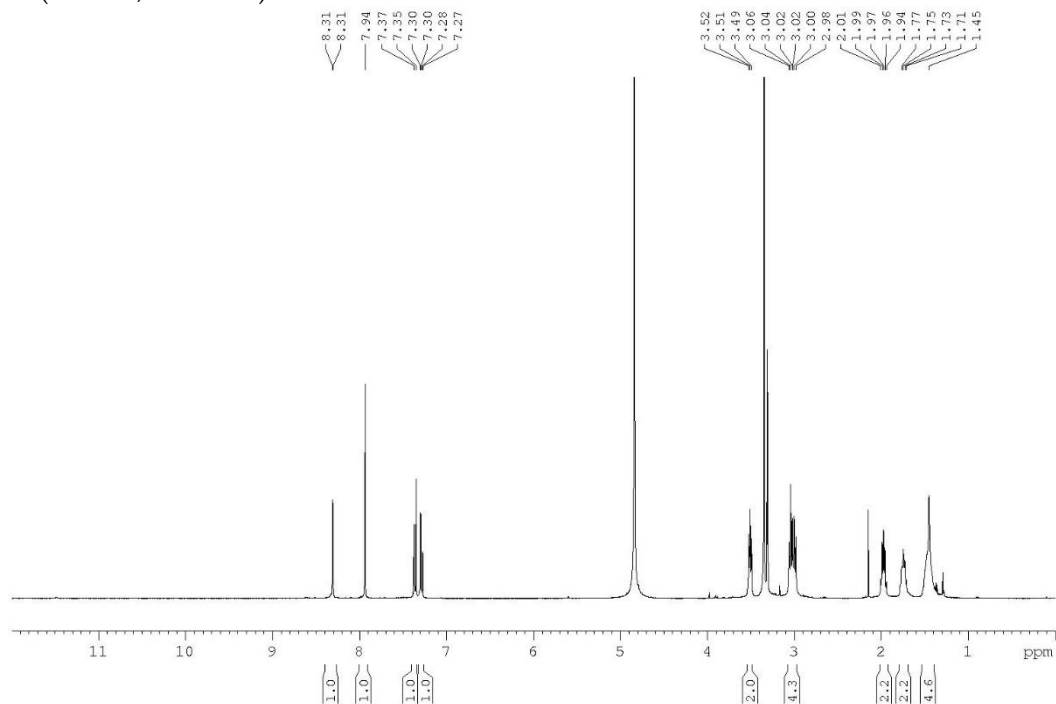

$^{13}\text{C}$  NMR ( $\text{CD}_3\text{OD}$ , 100 MHz):

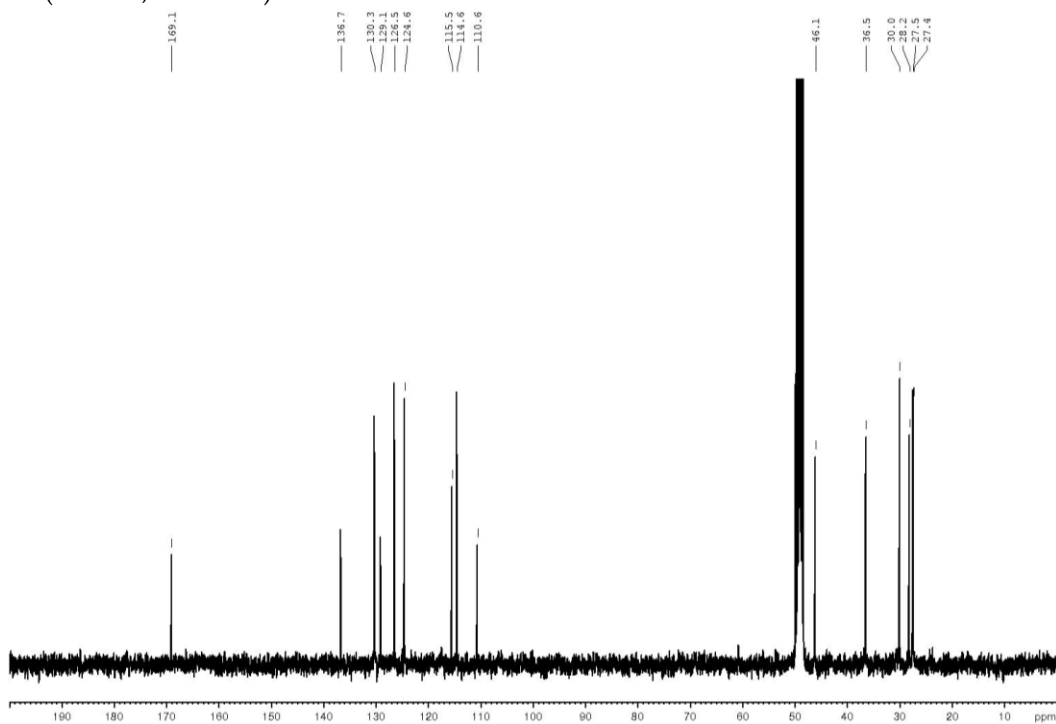

**Figure S9**  $^1\text{H}$  ( $\text{CD}_3\text{OD}$ , 400 MHz) and  $^{13}\text{C}$  ( $\text{CD}_3\text{OD}$ , 100 MHz) NMR spectra for **13d**

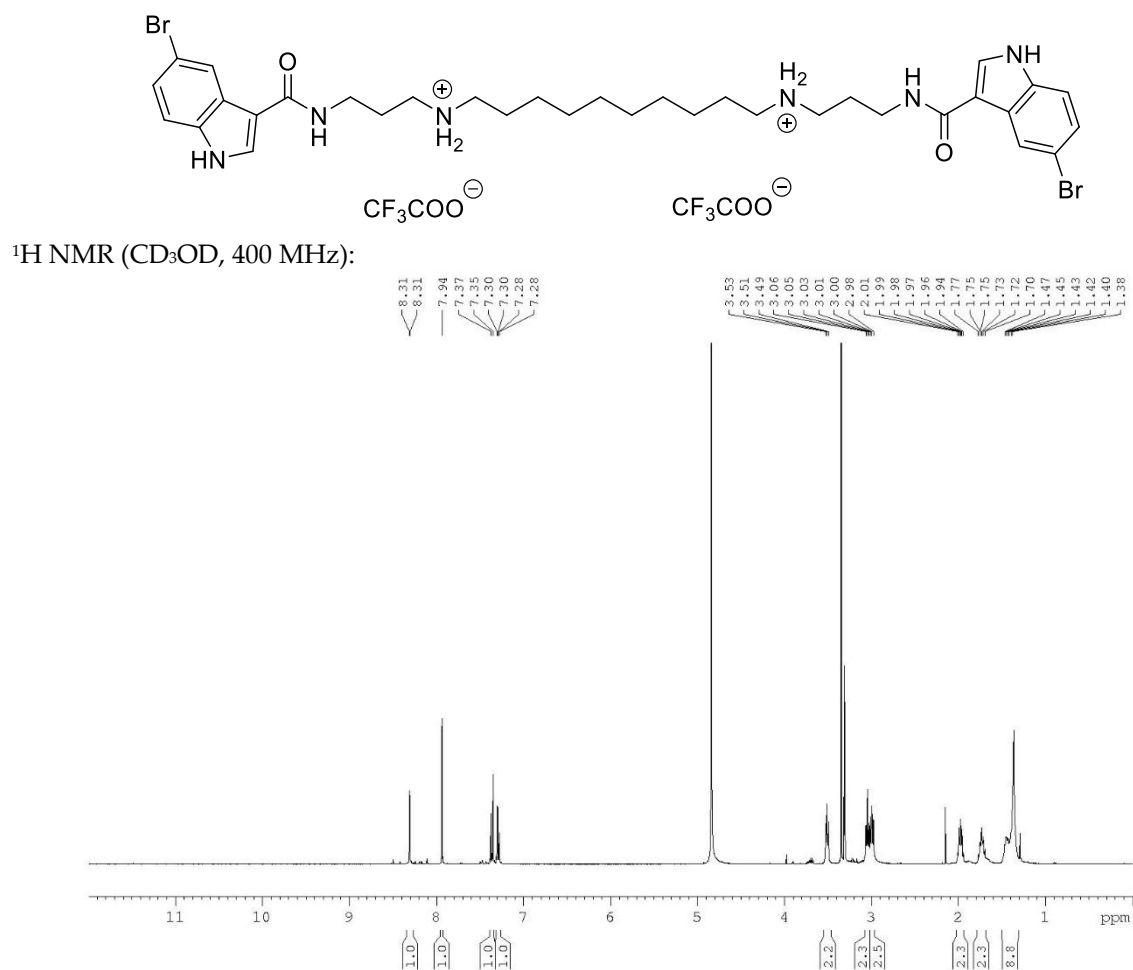

$^{13}\text{C}$  NMR ( $\text{CD}_3\text{OD}$ , 100 MHz):

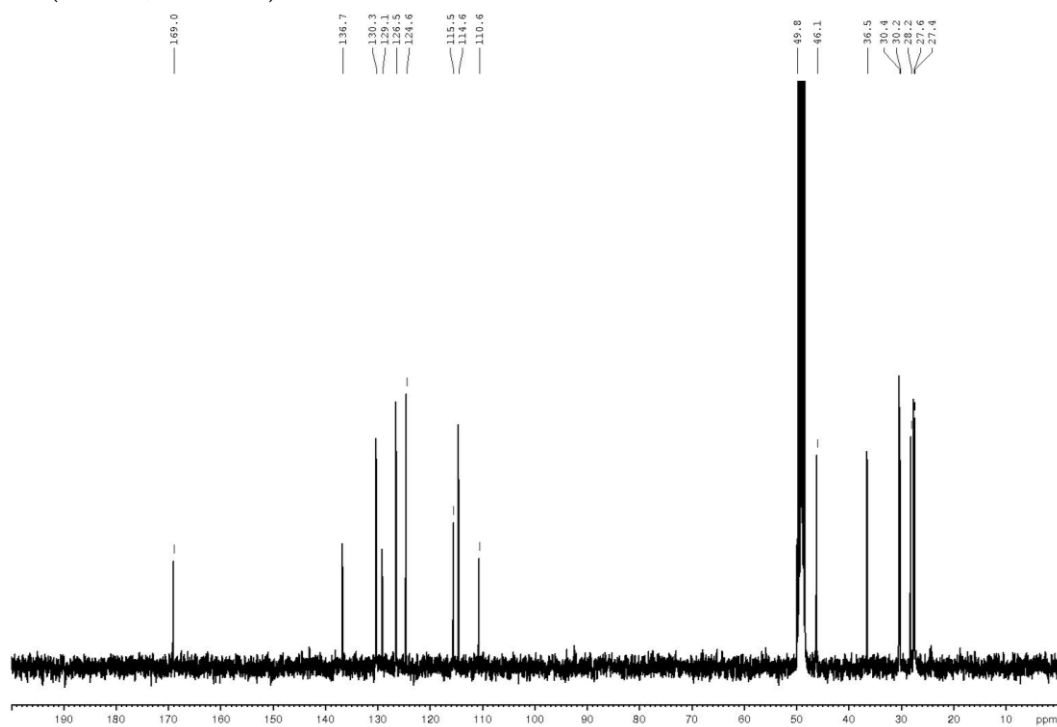

**Figure S10**  $^1\text{H}$  ( $\text{CD}_3\text{OD}$ , 400 MHz) and  $^{13}\text{C}$  ( $\text{CD}_3\text{OD}$ , 100 MHz) NMR spectra for **13e**

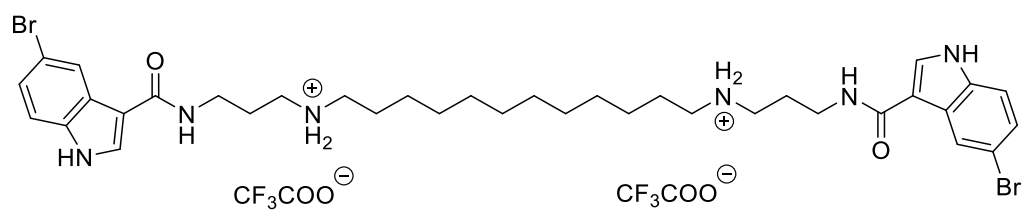

$^1\text{H}$  NMR ( $\text{CD}_3\text{OD}$ , 400 MHz):

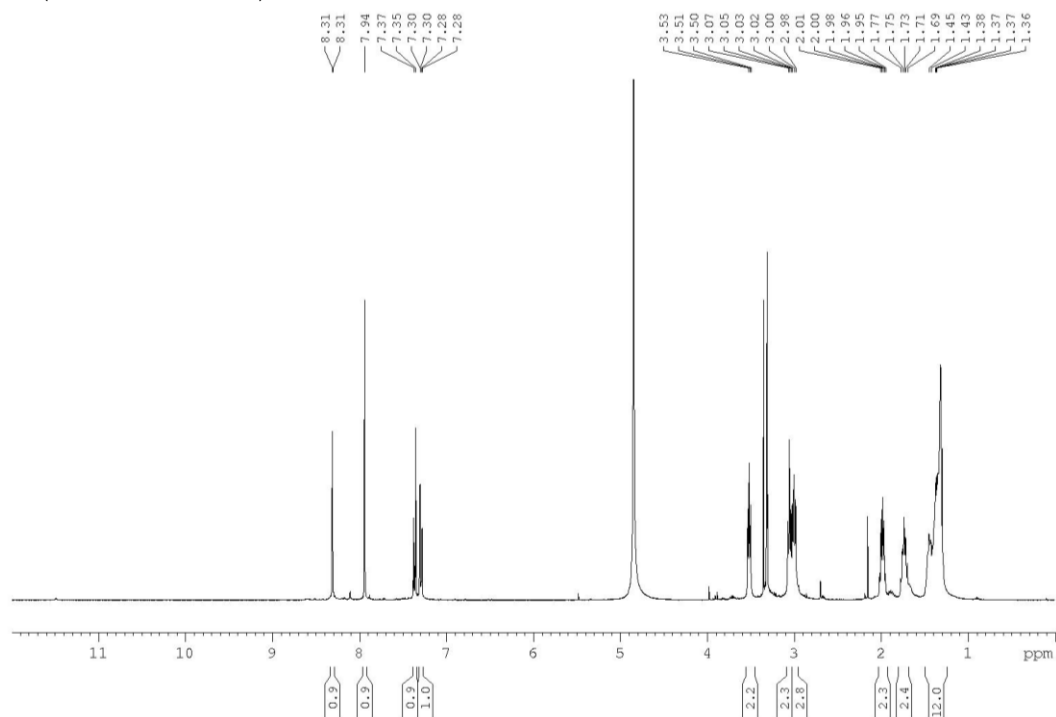

$^{13}\text{C}$  NMR ( $\text{CD}_3\text{OD}$ , 100 MHz):

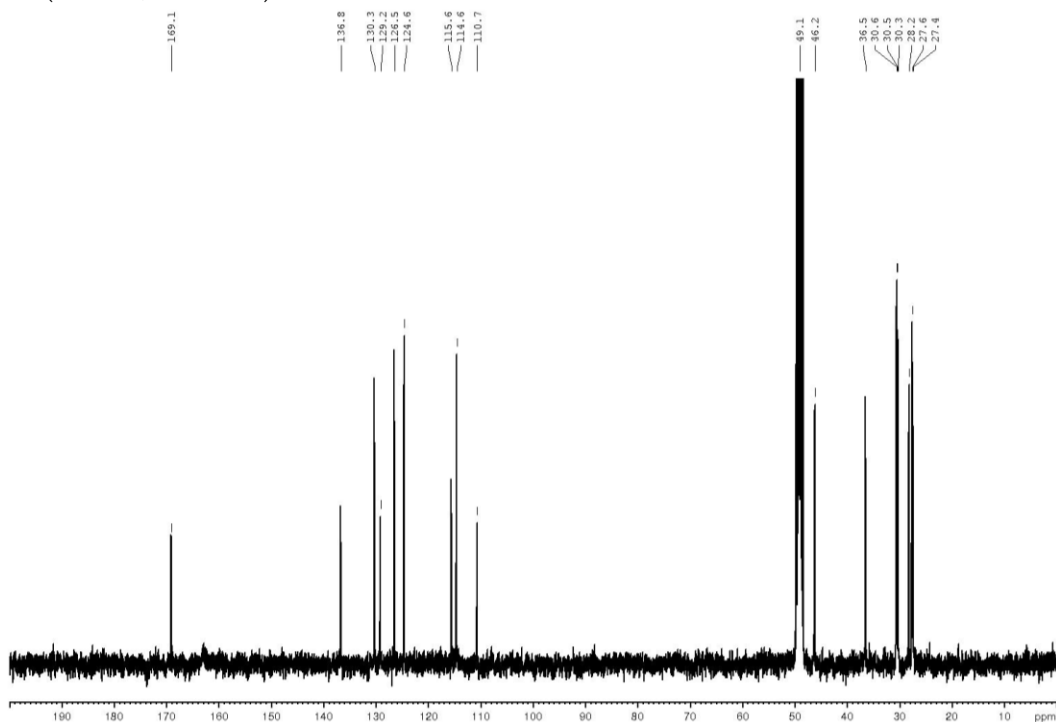

**Figure S11**  $^1\text{H}$  ( $\text{CD}_3\text{OD}$ , 400 MHz) and  $^{13}\text{C}$  ( $\text{CD}_3\text{OD}$ , 100 MHz) NMR spectra for **13f**

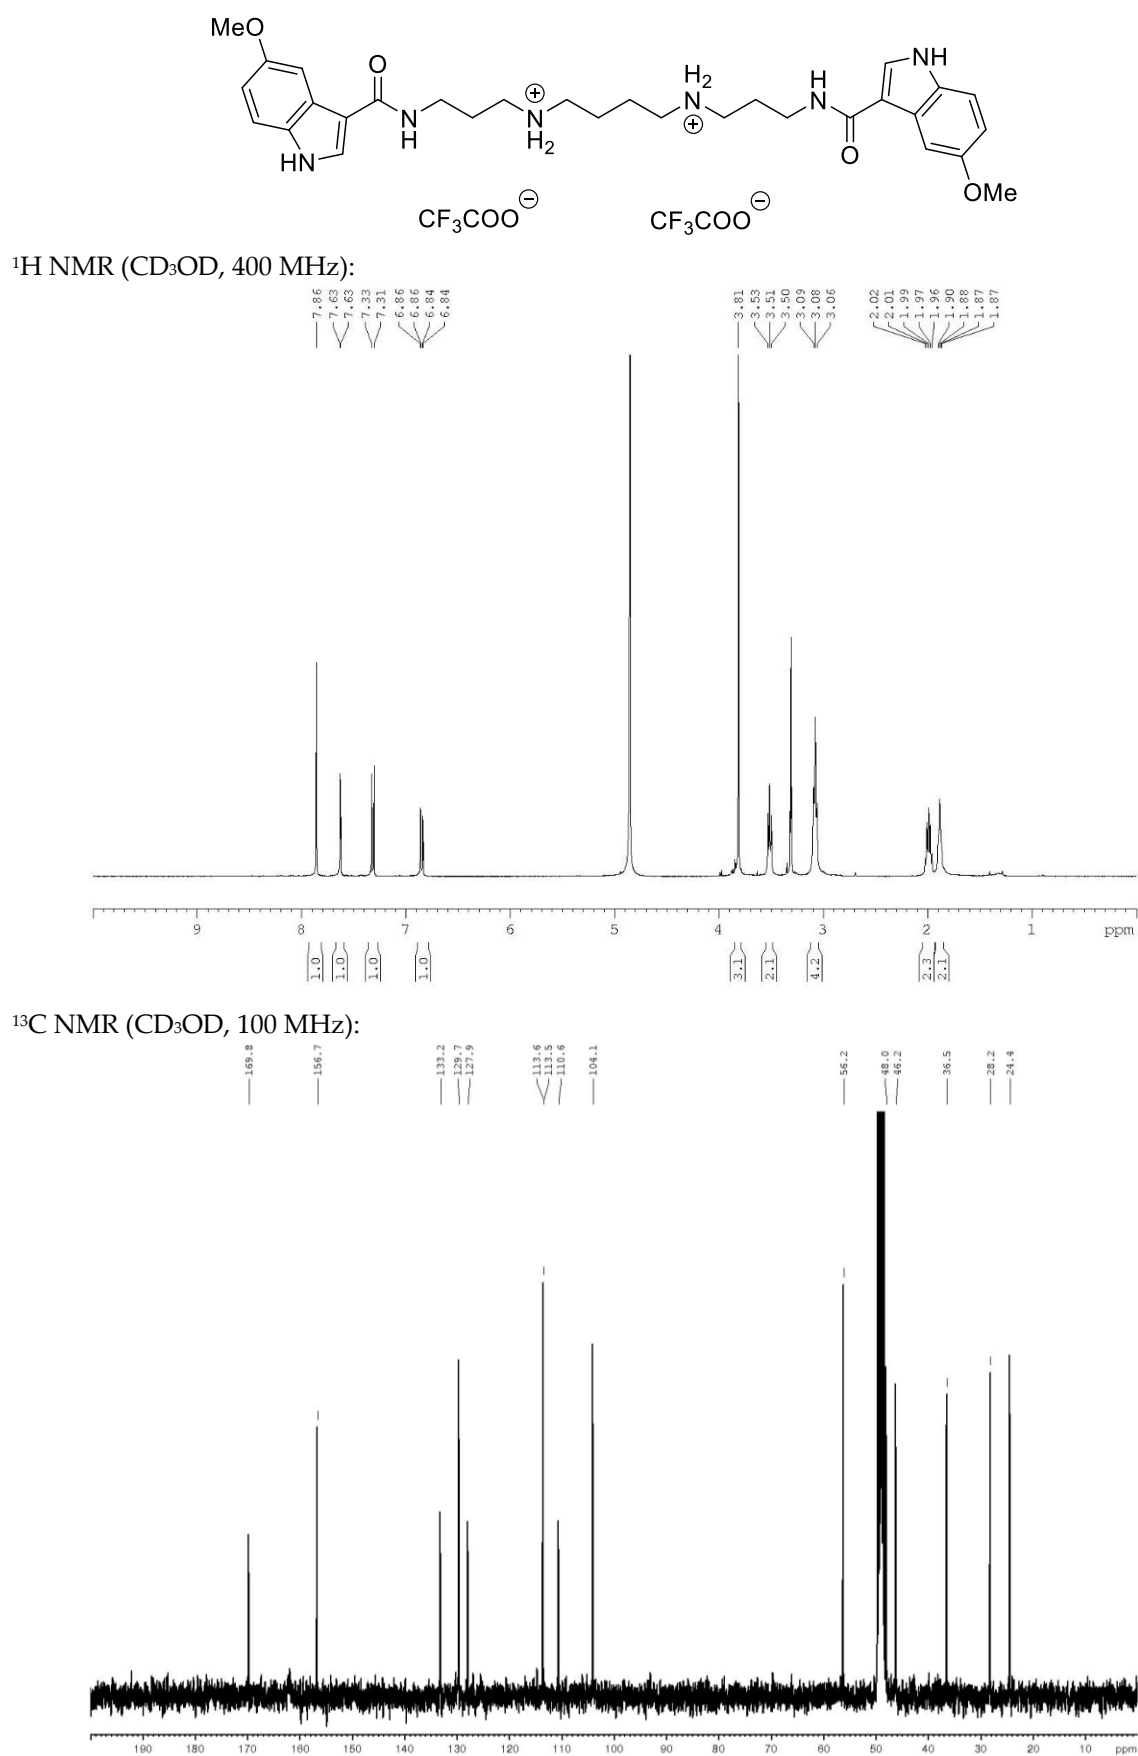

**Figure S12** <sup>1</sup>H (CD<sub>3</sub>OD, 400 MHz) and <sup>13</sup>C (CD<sub>3</sub>OD, 100 MHz) NMR spectra for **14a**

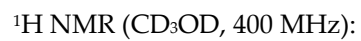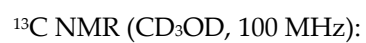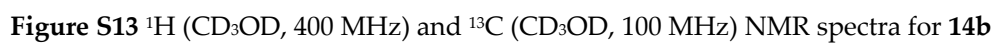

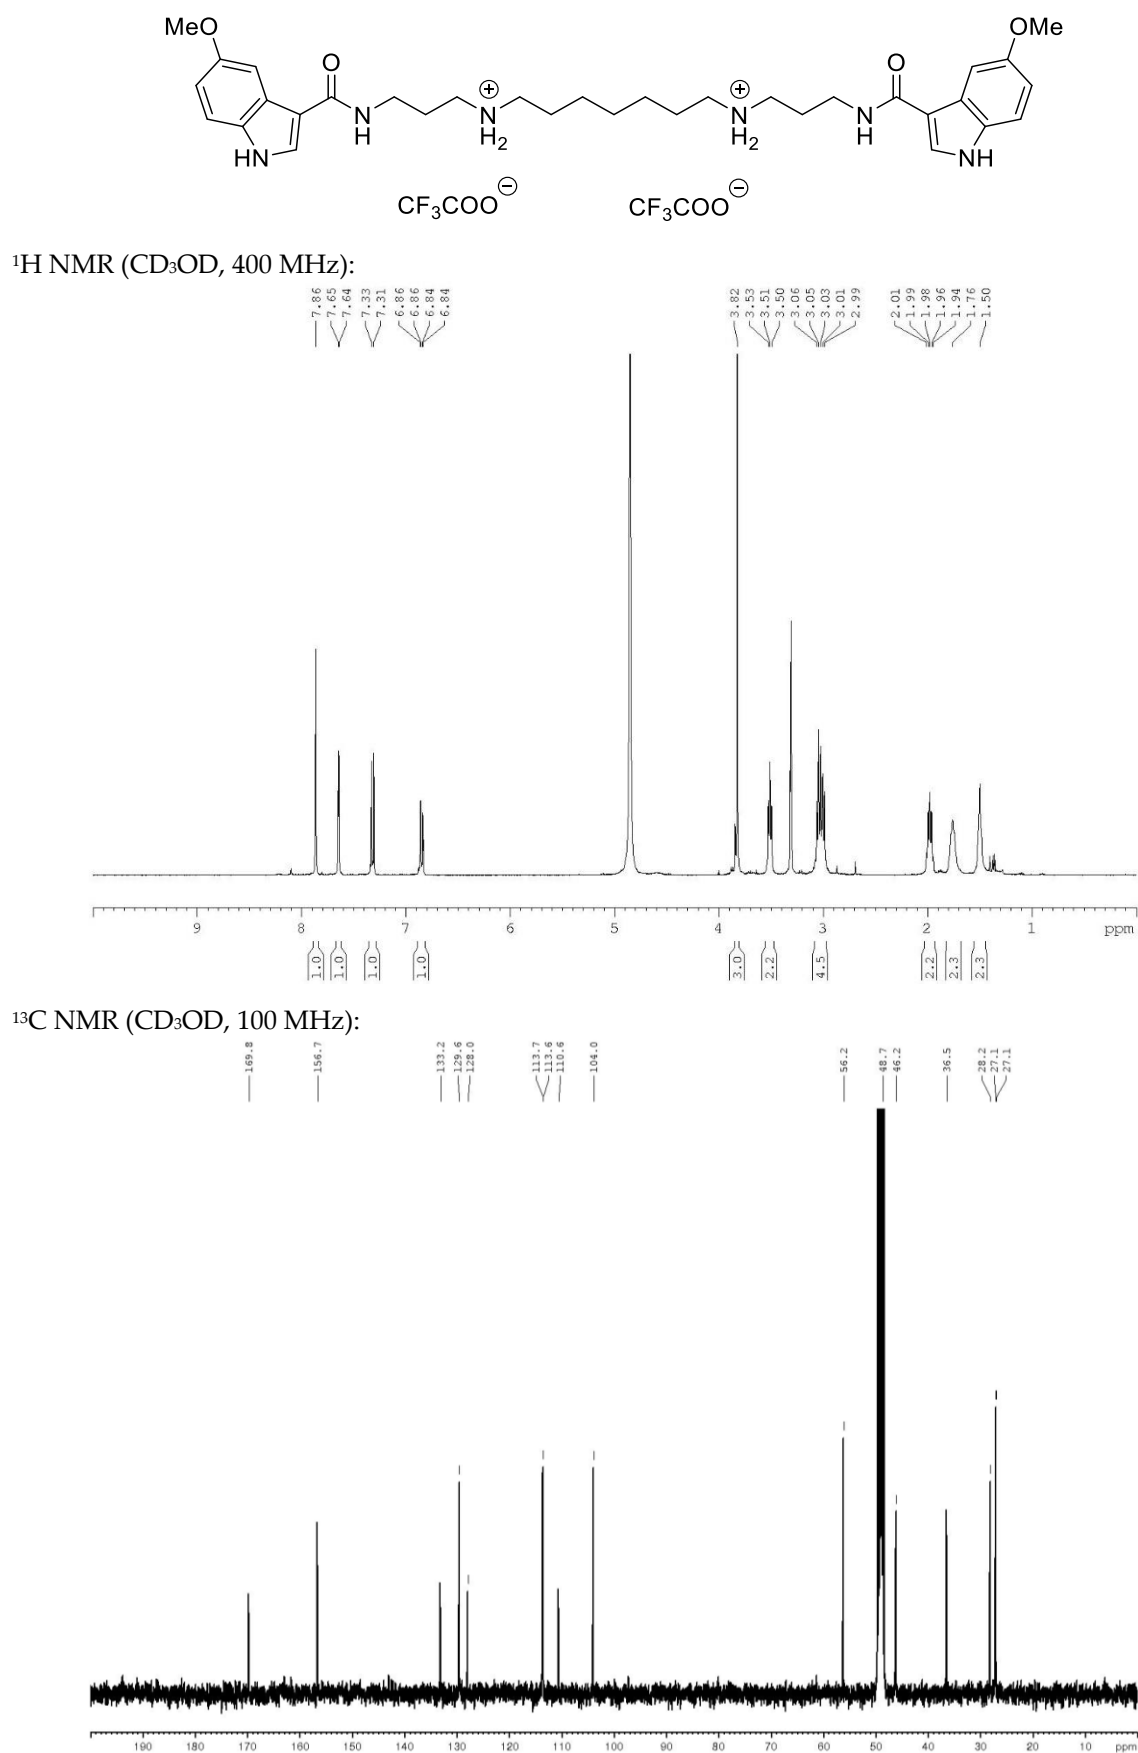

**Figure S14** <sup>1</sup>H (CD<sub>3</sub>OD, 400 MHz) and <sup>13</sup>C (CD<sub>3</sub>OD, 100 MHz) NMR spectra for **14c**



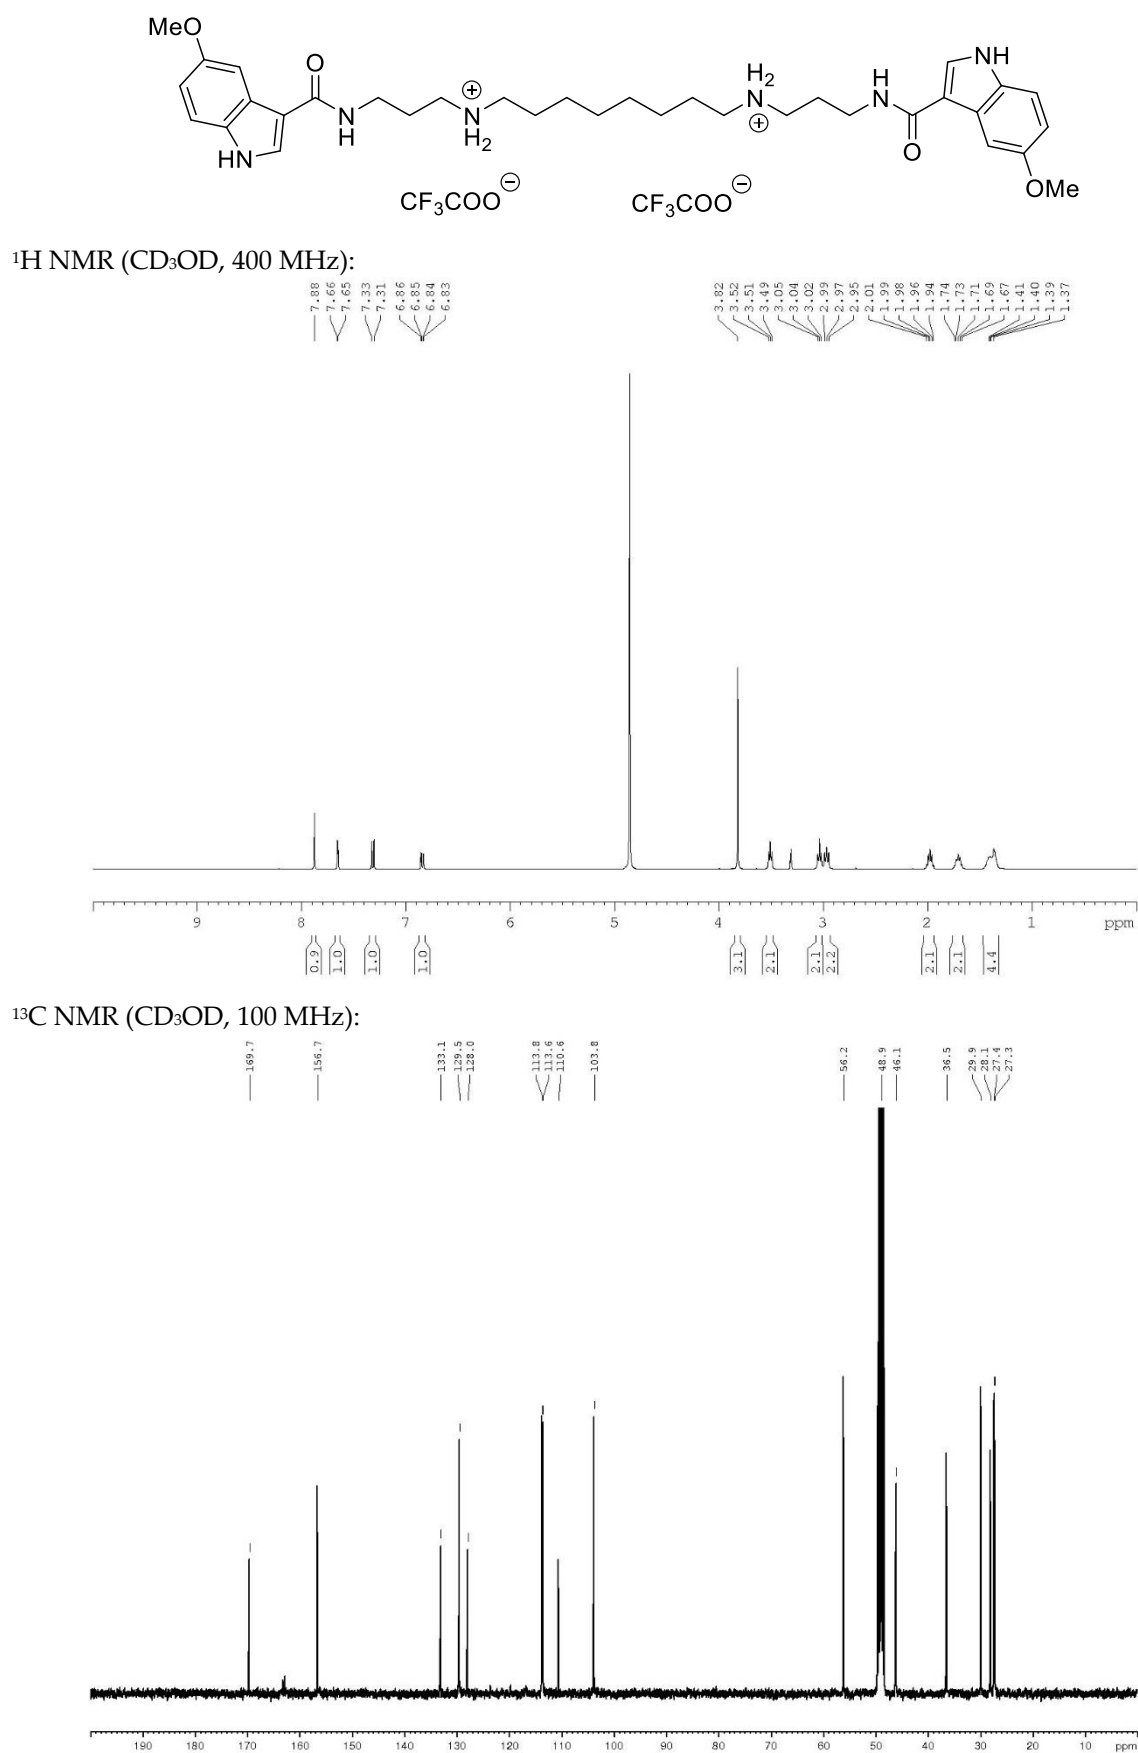

**Figure S15**  $^1\text{H}$  ( $\text{CD}_3\text{OD}$ , 400 MHz) and  $^{13}\text{C}$  ( $\text{CD}_3\text{OD}$ , 100 MHz) NMR spectra for **14d**

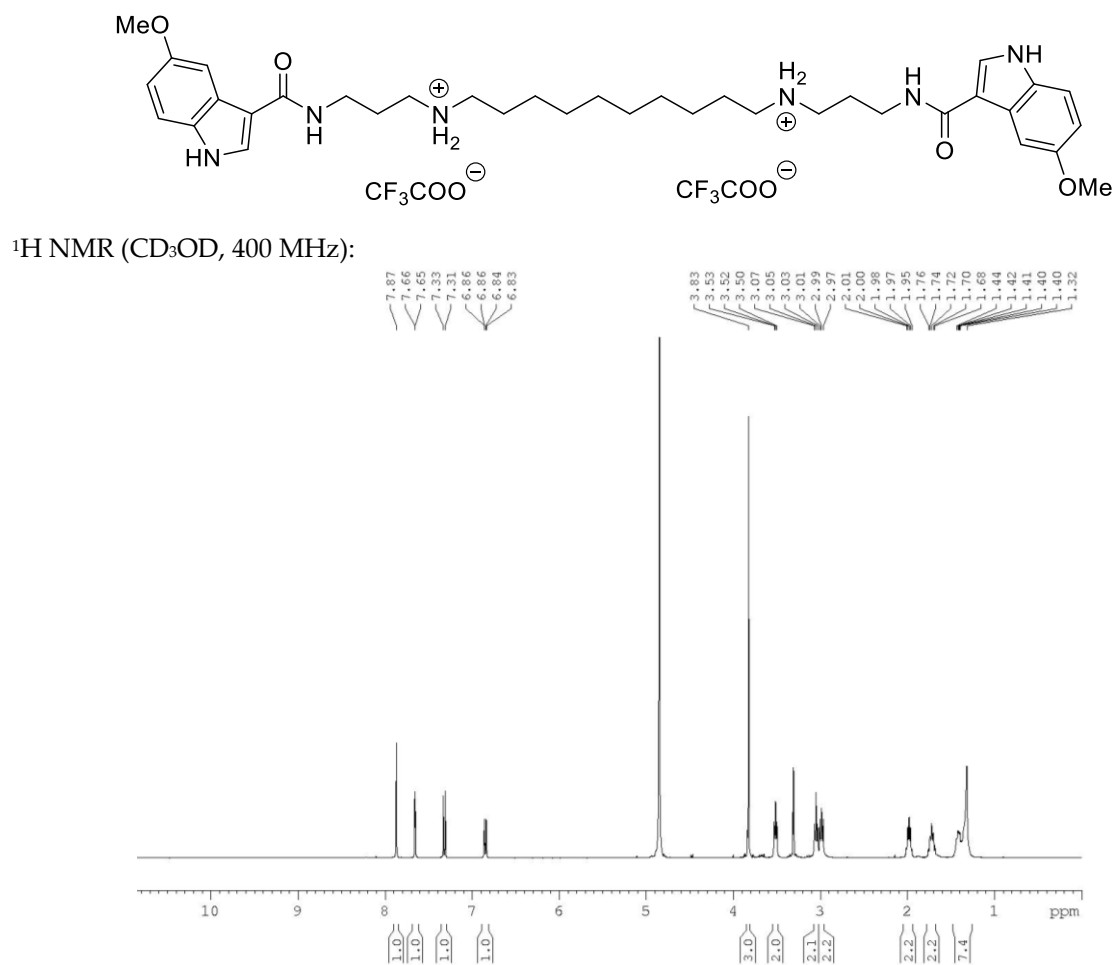

$^{13}\text{C}$  NMR ( $\text{CD}_3\text{OD}$ , 100 MHz):

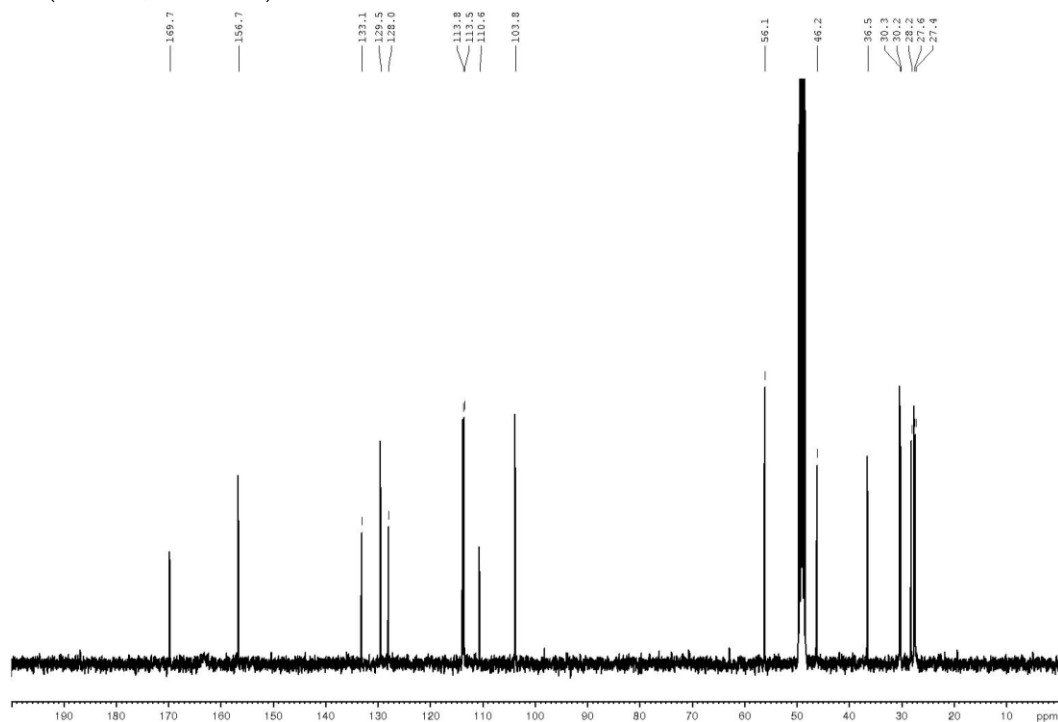

**Figure S16**  $^1\text{H}$  ( $\text{CD}_3\text{OD}$ , 400 MHz) and  $^{13}\text{C}$  ( $\text{CD}_3\text{OD}$ , 100 MHz) NMR spectra for **14e**

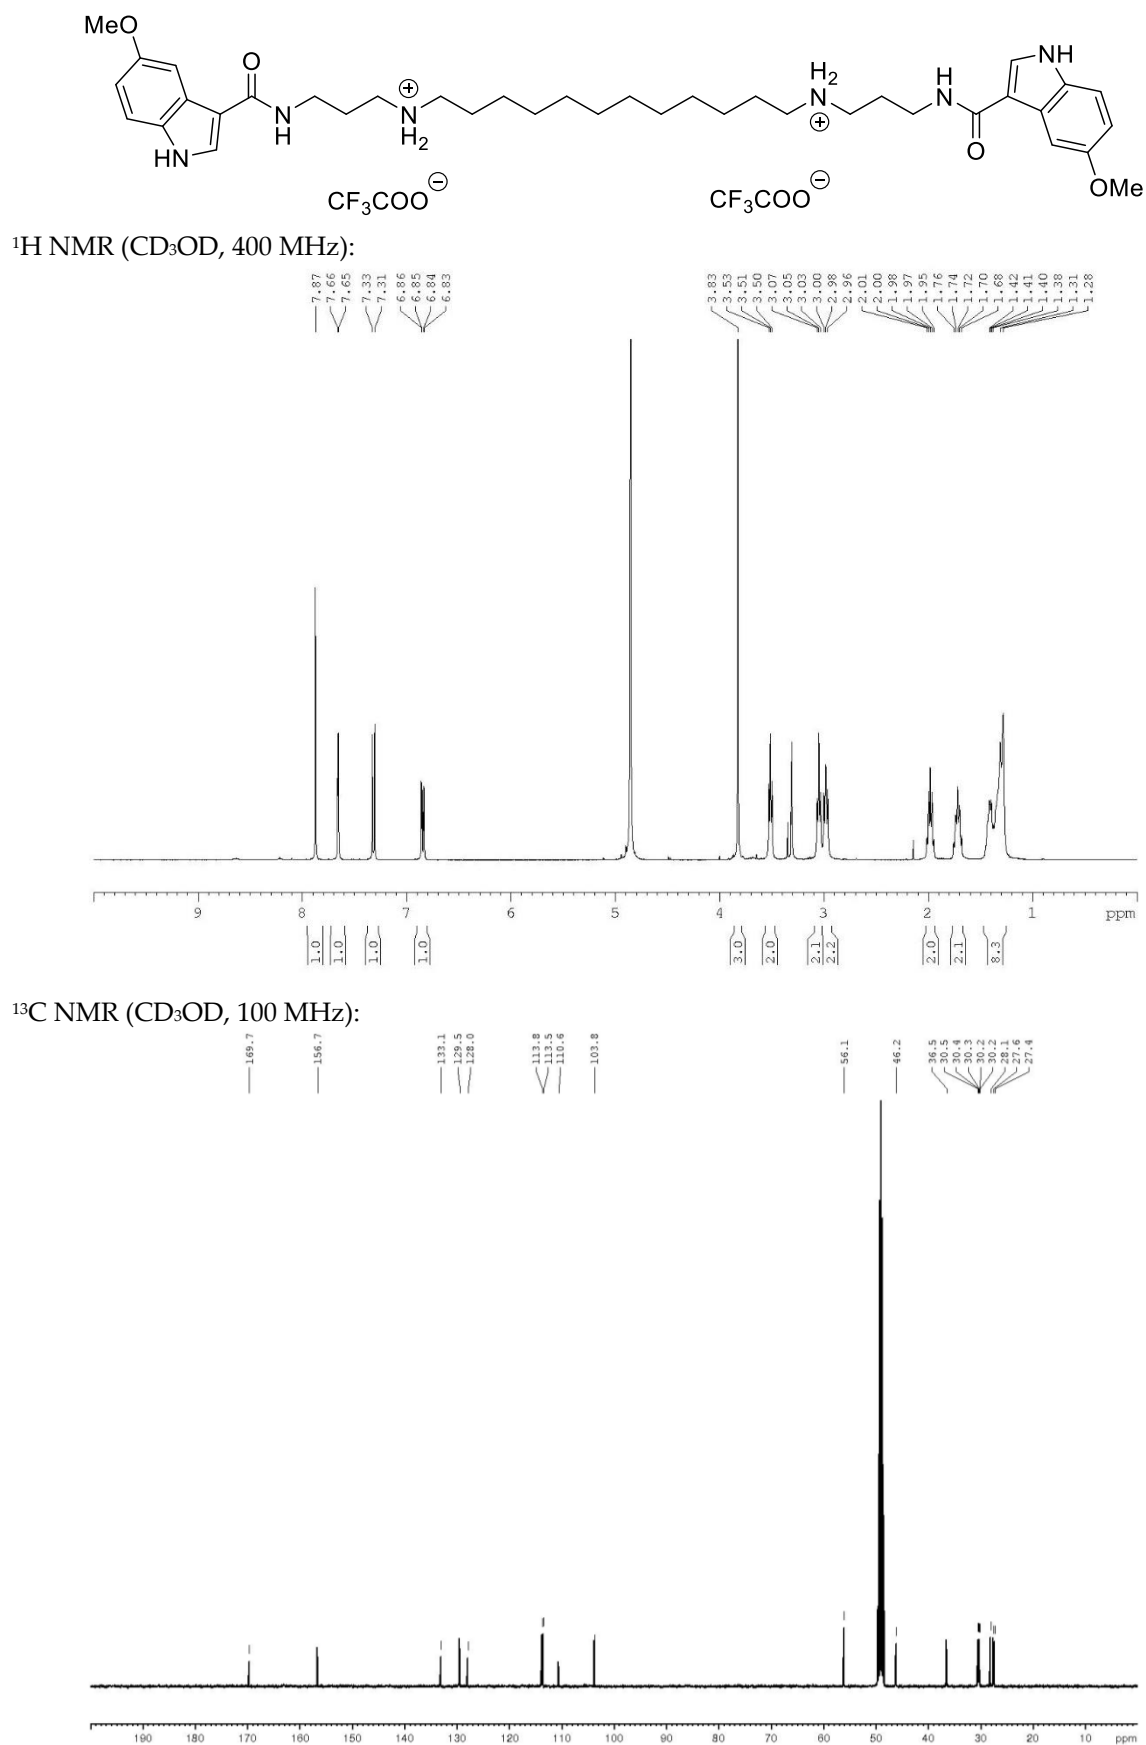

**Figure S17** <sup>1</sup>H (CD<sub>3</sub>OD, 400 MHz) and <sup>13</sup>C (CD<sub>3</sub>OD, 100 MHz) NMR spectra for **14f**

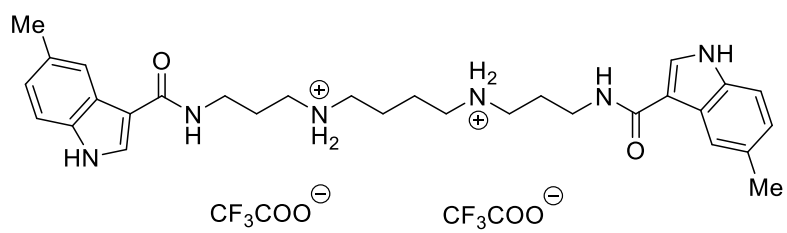

$^1\text{H}$  NMR ( $\text{CD}_3\text{OD}$ , 400 MHz):

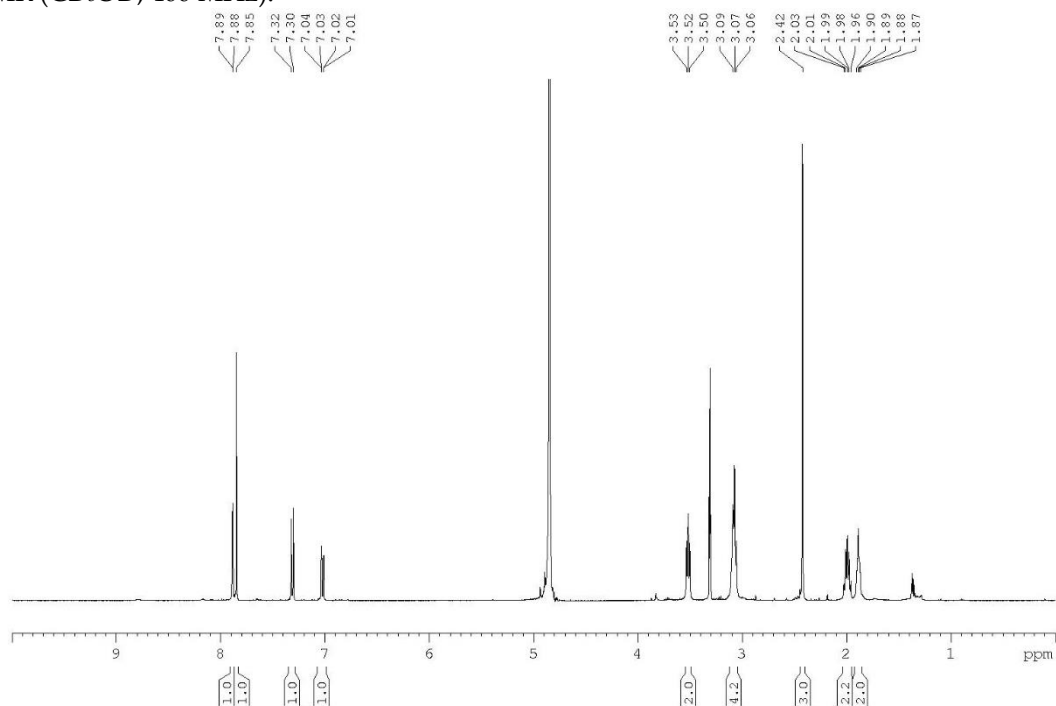

$^{13}\text{C}$  NMR ( $\text{CD}_3\text{OD}$ , 100 MHz):

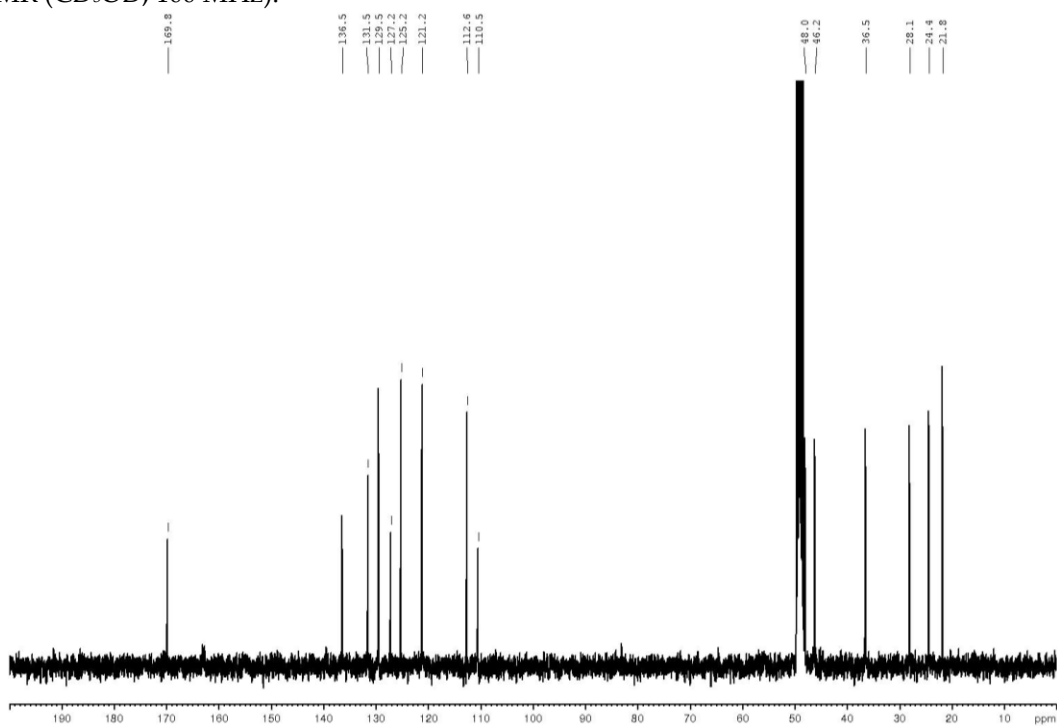

**Figure S18**  $^1\text{H}$  ( $\text{CD}_3\text{OD}$ , 400 MHz) and  $^{13}\text{C}$  ( $\text{CD}_3\text{OD}$ , 100 MHz) NMR spectra for **15a**

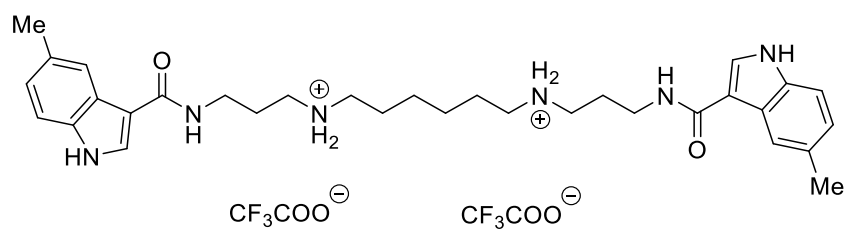

$^1\text{H}$  NMR ( $\text{CD}_3\text{OD}$ , 400 MHz):

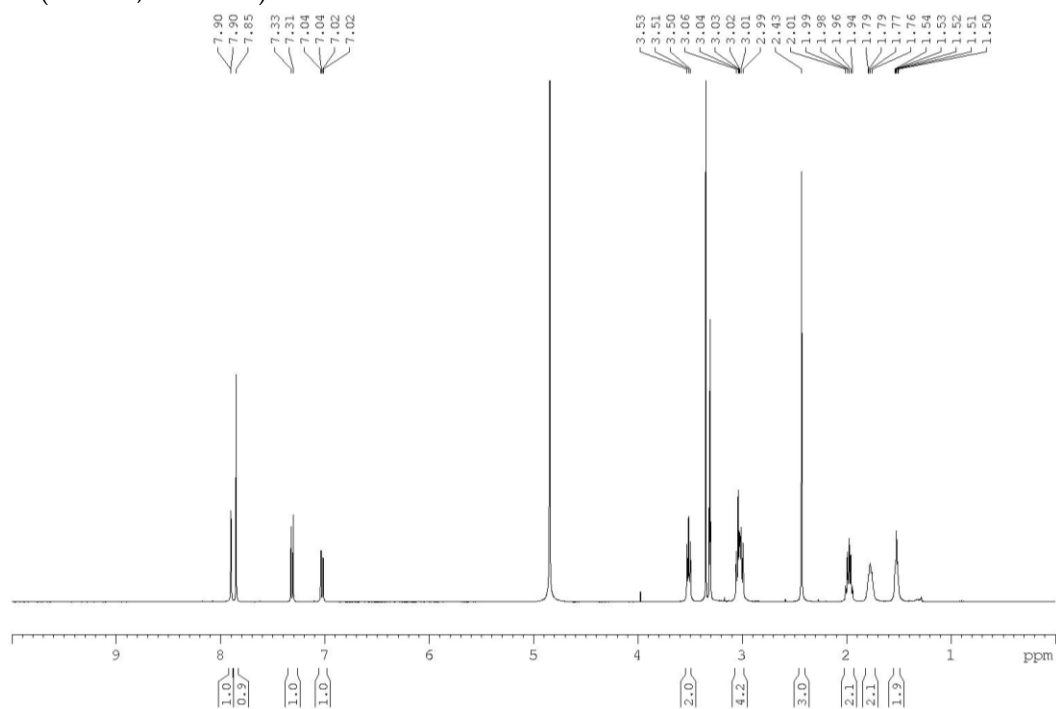

$^{13}\text{C}$  NMR ( $\text{CD}_3\text{OD}$ , 100 MHz):

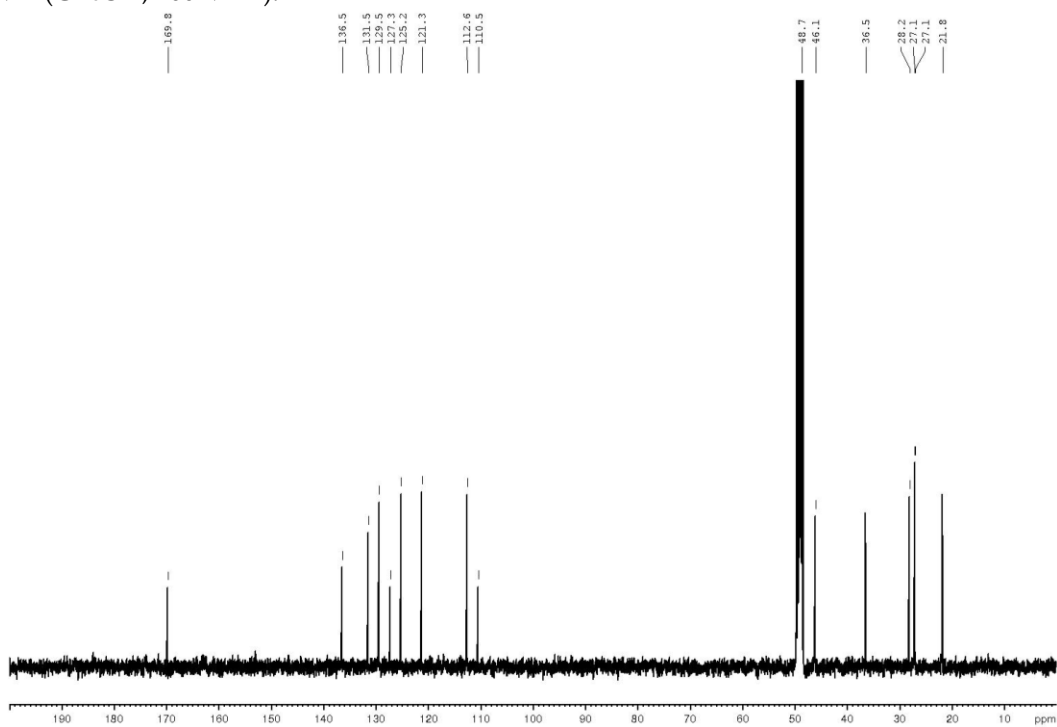

**Figure S19**  $^1\text{H}$  ( $\text{CD}_3\text{OD}$ , 400 MHz) and  $^{13}\text{C}$  ( $\text{CD}_3\text{OD}$ , 100 MHz) NMR spectra for **15b**

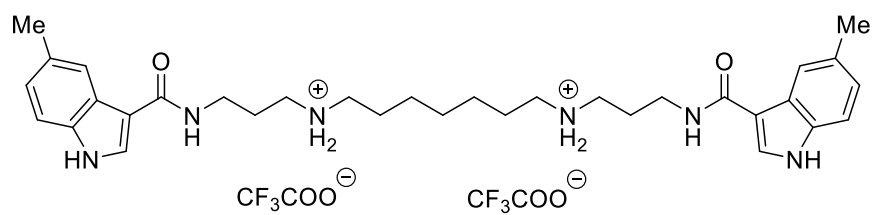

$^1\text{H}$  NMR ( $\text{CD}_3\text{OD}$ , 400 MHz):

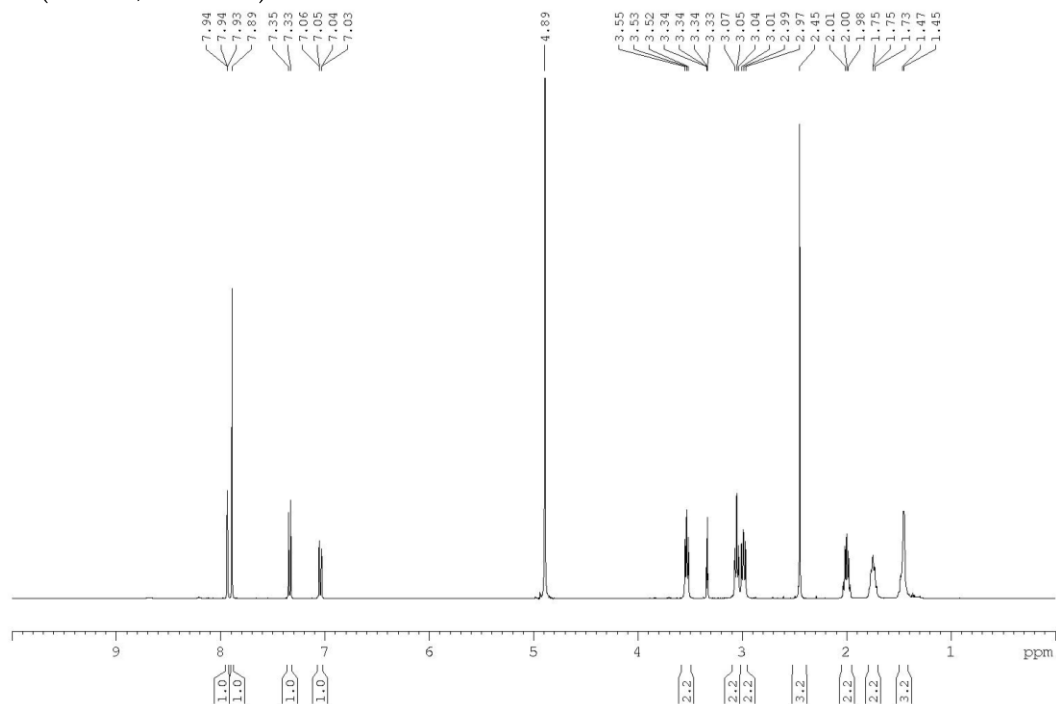

$^{13}\text{C}$  NMR ( $\text{CD}_3\text{OD}$ , 100 MHz):

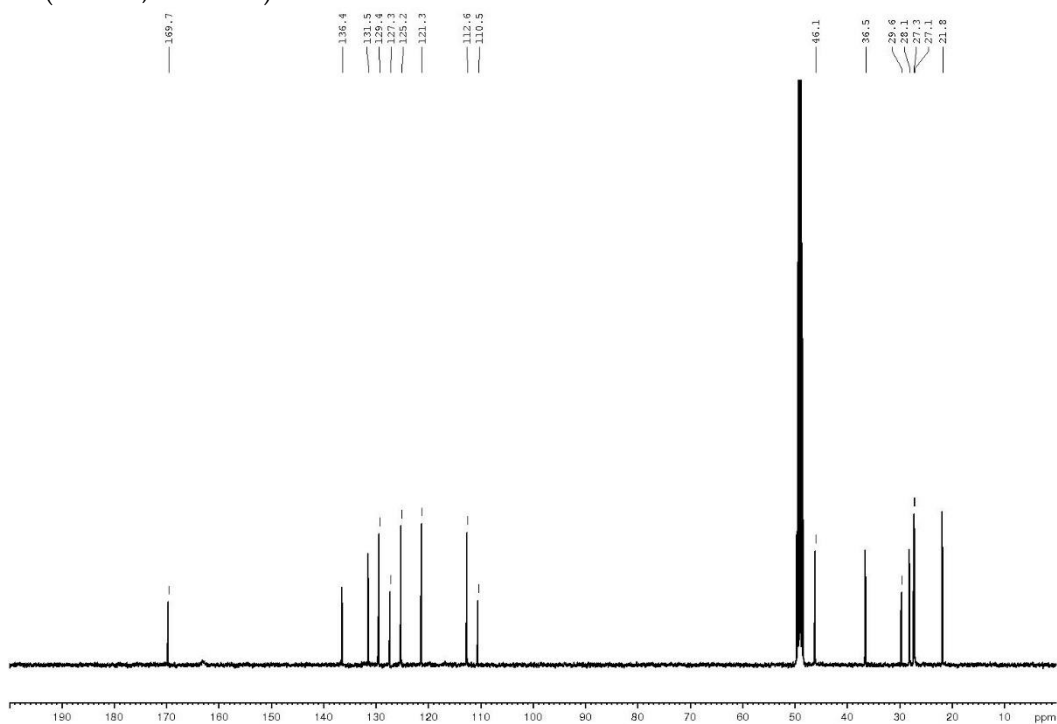

**Figure S20**  $^1\text{H}$  ( $\text{CD}_3\text{OD}$ , 400 MHz) and  $^{13}\text{C}$  ( $\text{CD}_3\text{OD}$ , 100 MHz) NMR spectra for **15c**

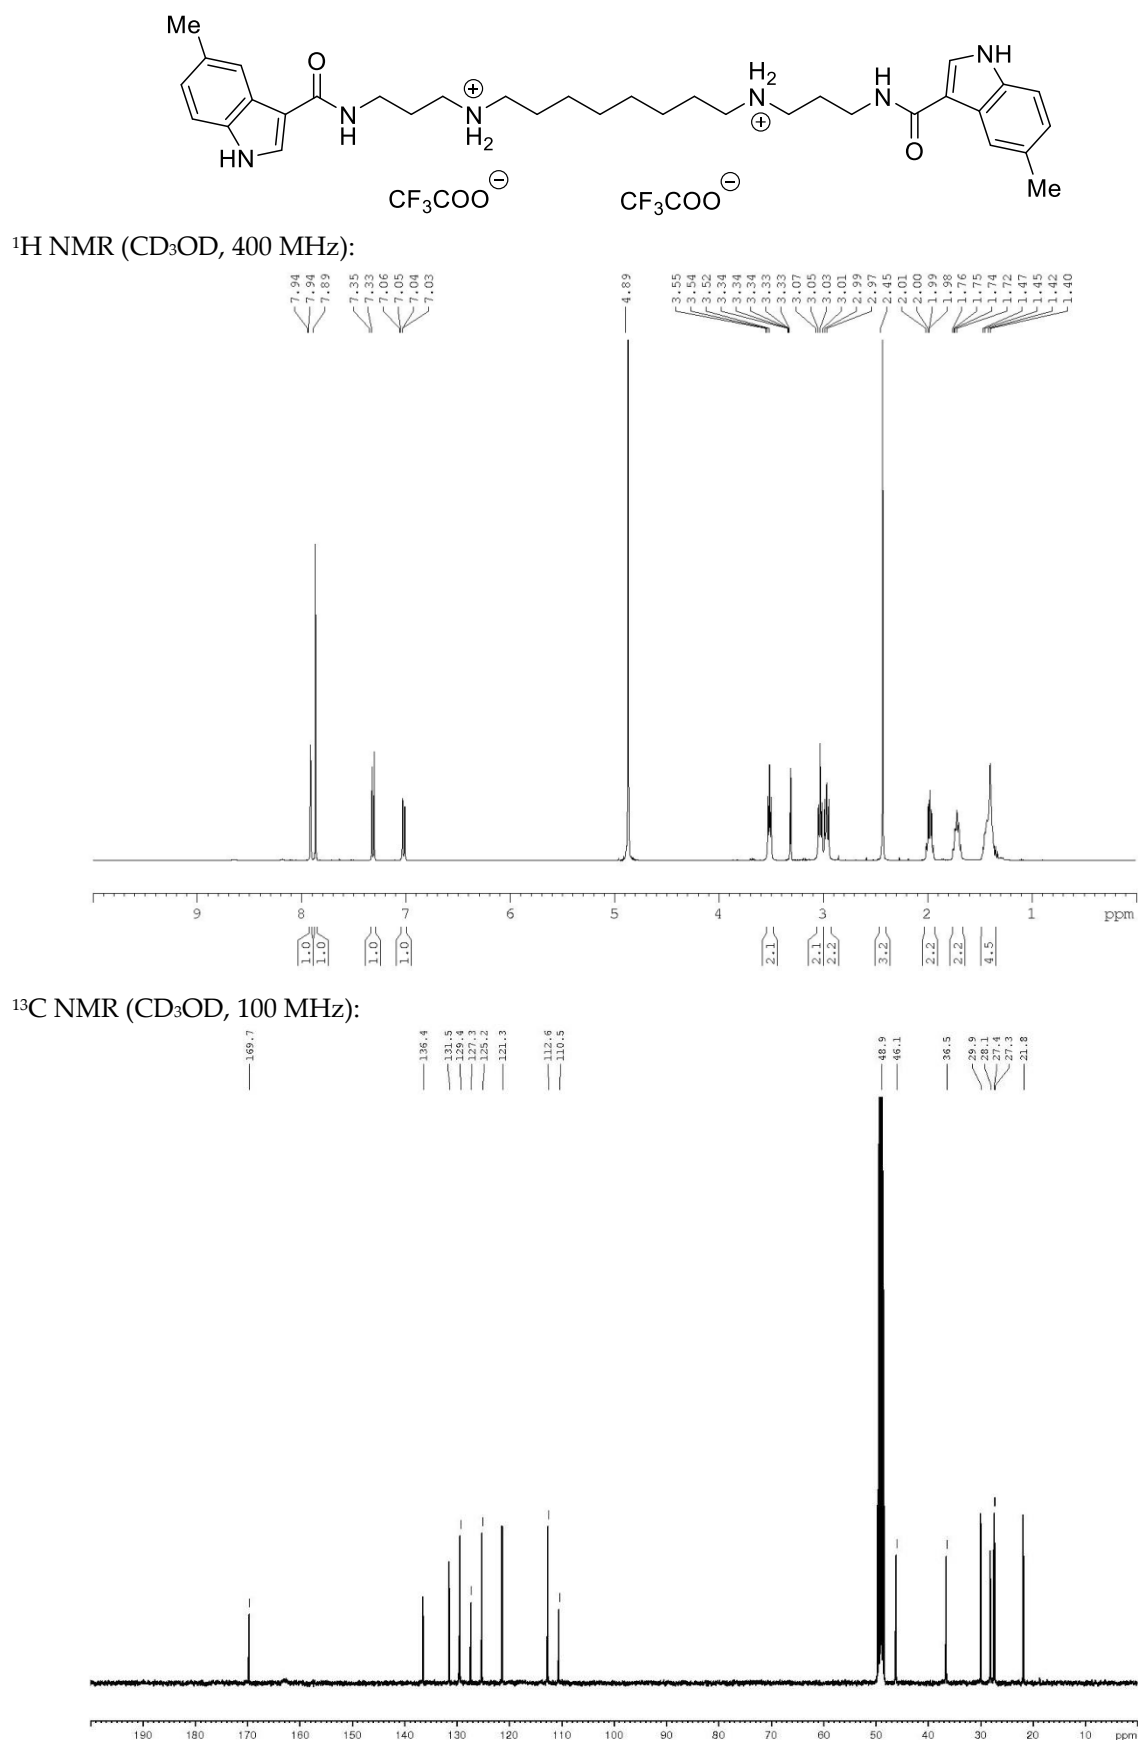

**Figure S21**  $^1\text{H}$  ( $\text{CD}_3\text{OD}$ , 400 MHz) and  $^{13}\text{C}$  ( $\text{CD}_3\text{OD}$ , 100 MHz) NMR spectra for **15d**

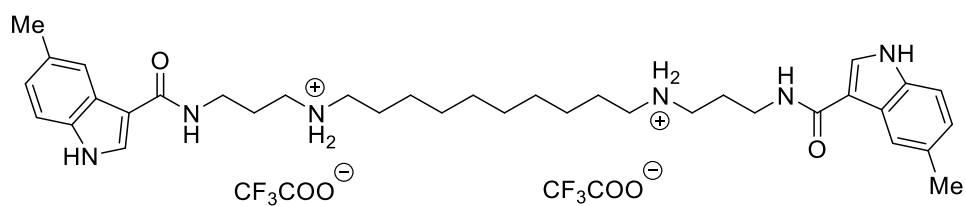

$^1\text{H}$  NMR ( $\text{CD}_3\text{OD}$ , 400 MHz):

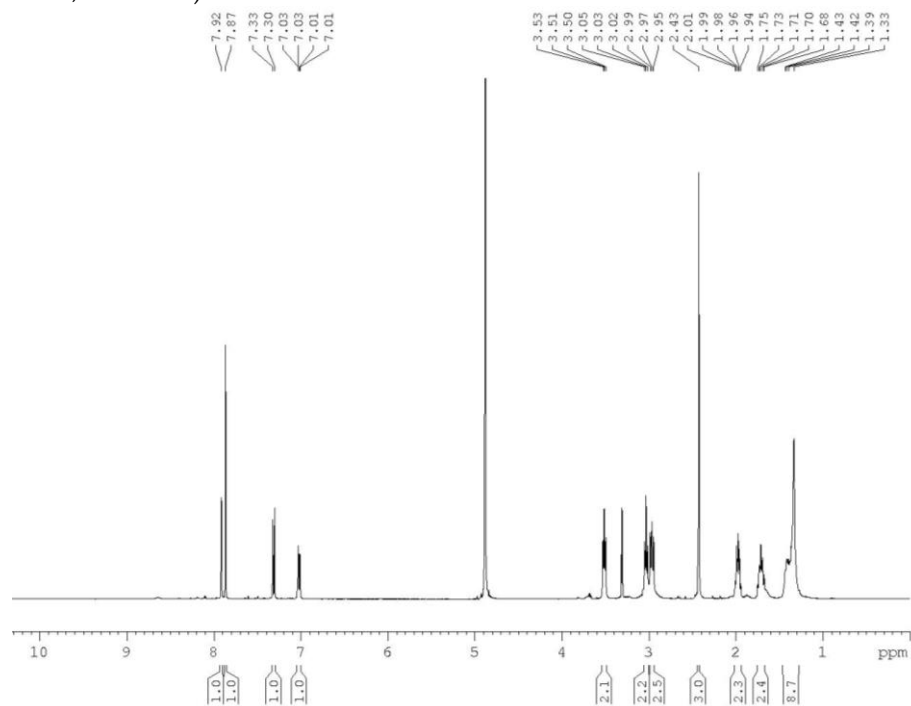

$^{13}\text{C}$  NMR ( $\text{CD}_3\text{OD}$ , 100 MHz):

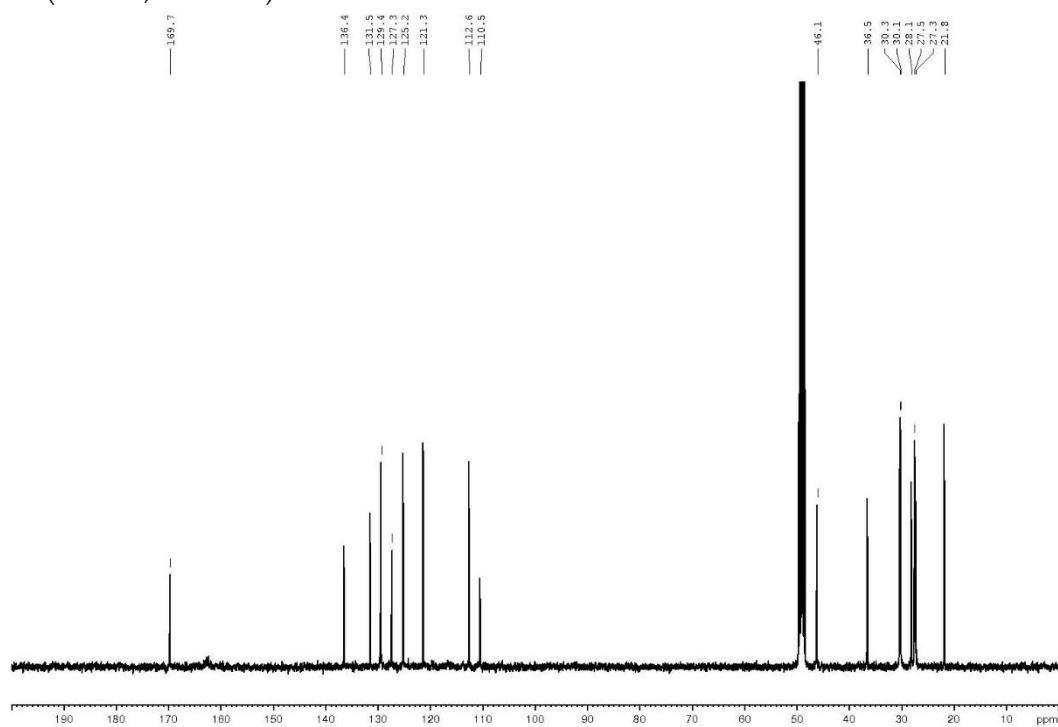

**Figure S22**  $^1\text{H}$  ( $\text{CD}_3\text{OD}$ , 400 MHz) and  $^{13}\text{C}$  ( $\text{CD}_3\text{OD}$ , 100 MHz) NMR spectra for **15e**



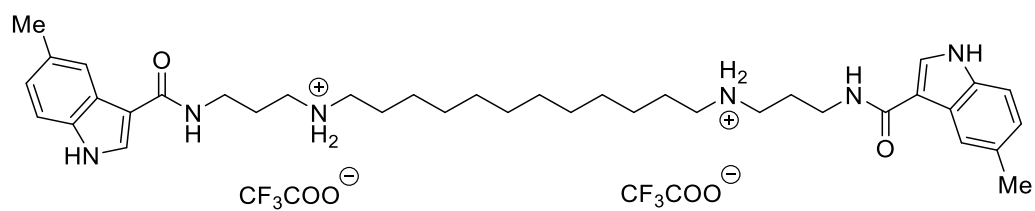

$^1\text{H}$  NMR ( $\text{CD}_3\text{OD}$ , 400 MHz):

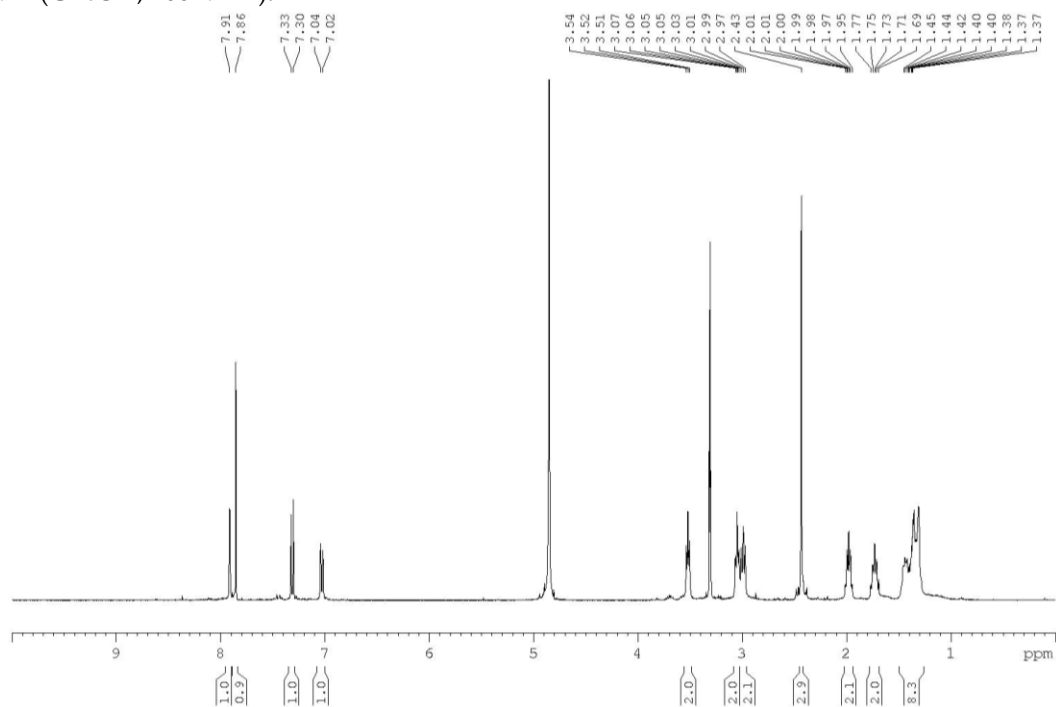

$^{13}\text{C}$  NMR ( $\text{CD}_3\text{OD}$ , 100 MHz):

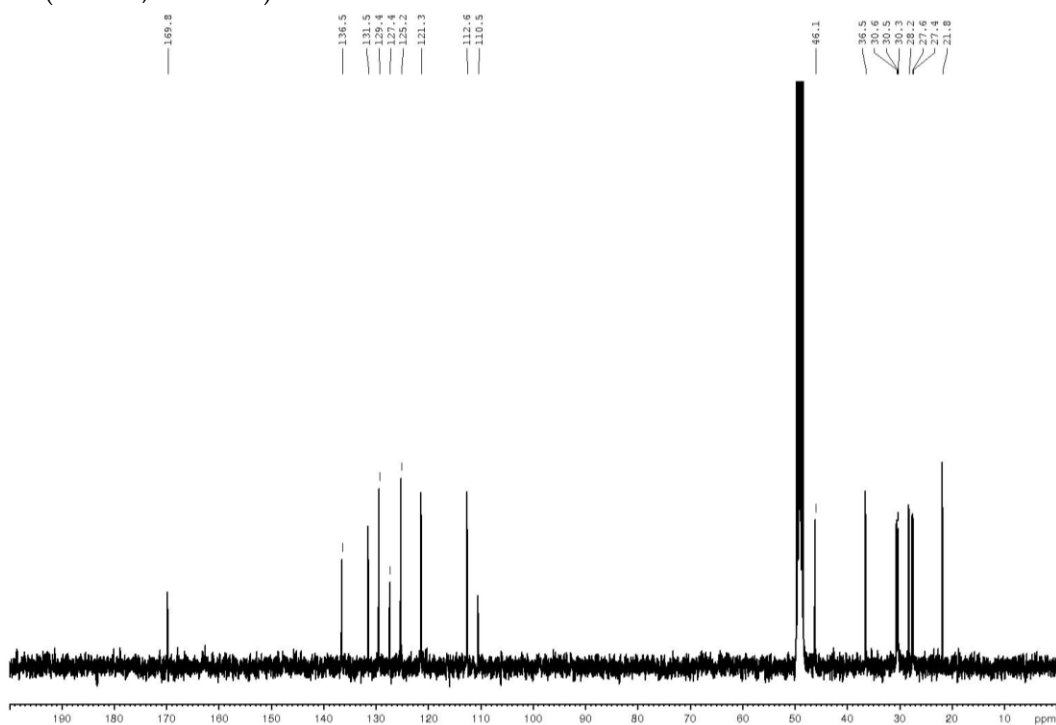

**Figure S23**  $^1\text{H}$  ( $\text{CD}_3\text{OD}$ , 400 MHz) and  $^{13}\text{C}$  ( $\text{CD}_3\text{OD}$ , 100 MHz) NMR spectra for **15f**

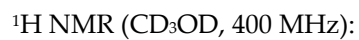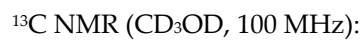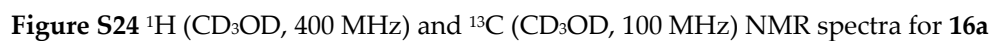

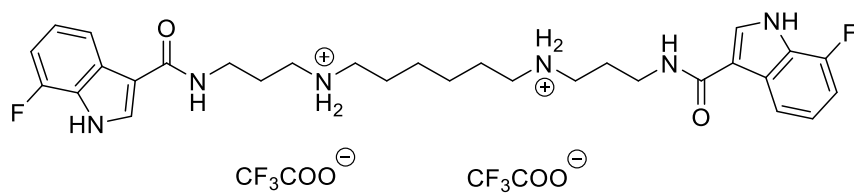

$^1\text{H}$  NMR ( $\text{CD}_3\text{OD}$ , 400 MHz):

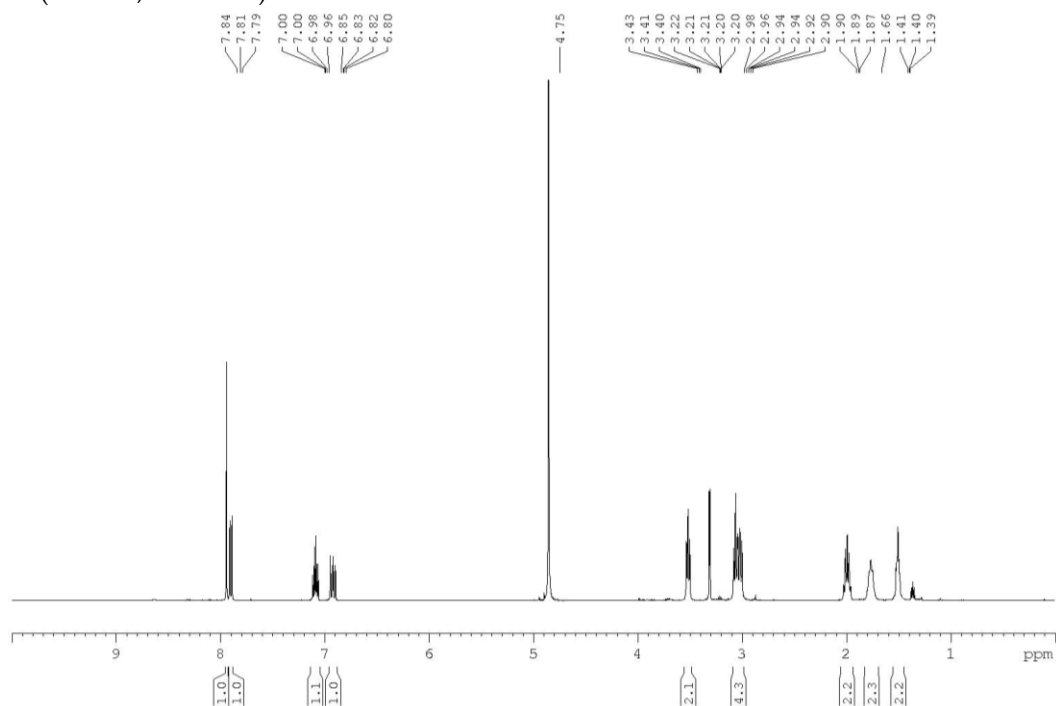

$^{13}\text{C}$  NMR ( $\text{CD}_3\text{OD}$ , 100 MHz):

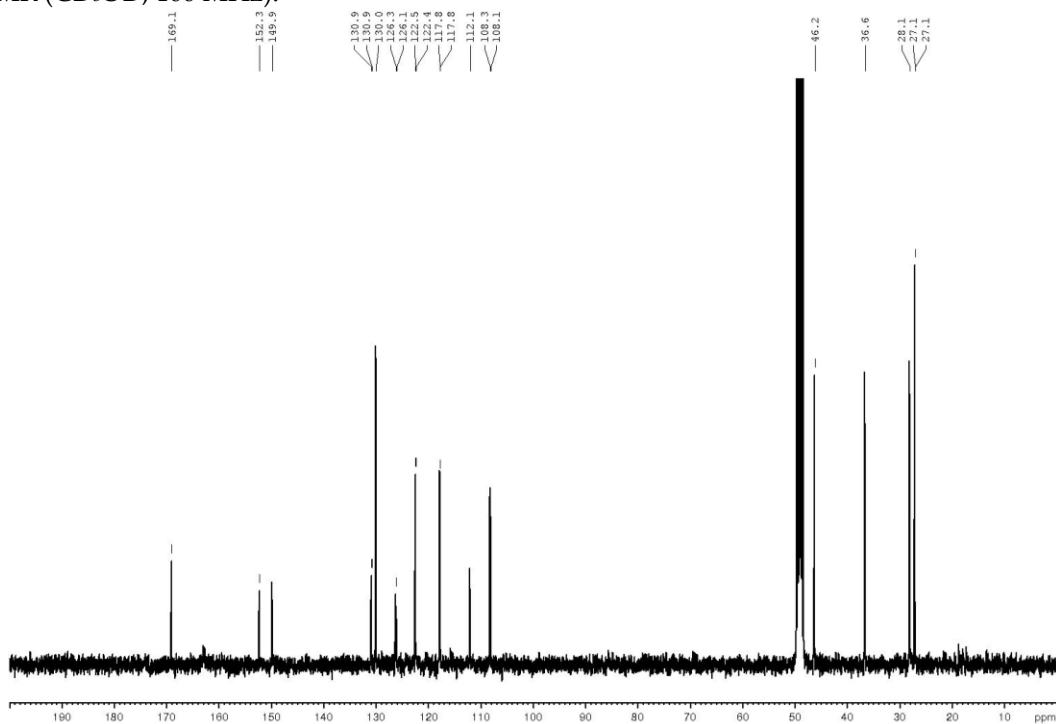

**Figure S25**  $^1\text{H}$  ( $\text{CD}_3\text{OD}$ , 400 MHz) and  $^{13}\text{C}$  ( $\text{CD}_3\text{OD}$ , 100 MHz) NMR spectra for **16b**

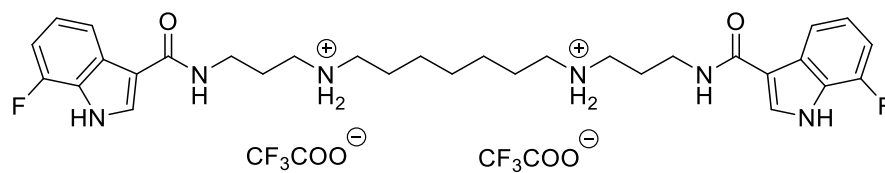

$^1\text{H}$  NMR ( $\text{CD}_3\text{OD}$ , 400 MHz):

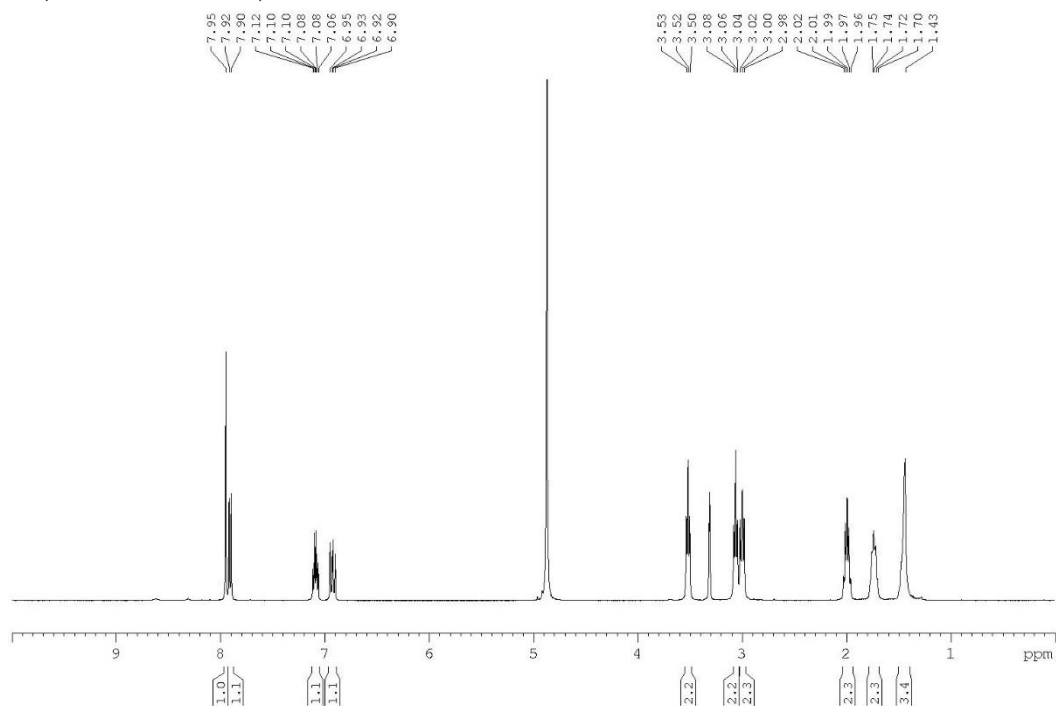

$^{13}\text{C}$  NMR ( $\text{CD}_3\text{OD}$ , 100 MHz):

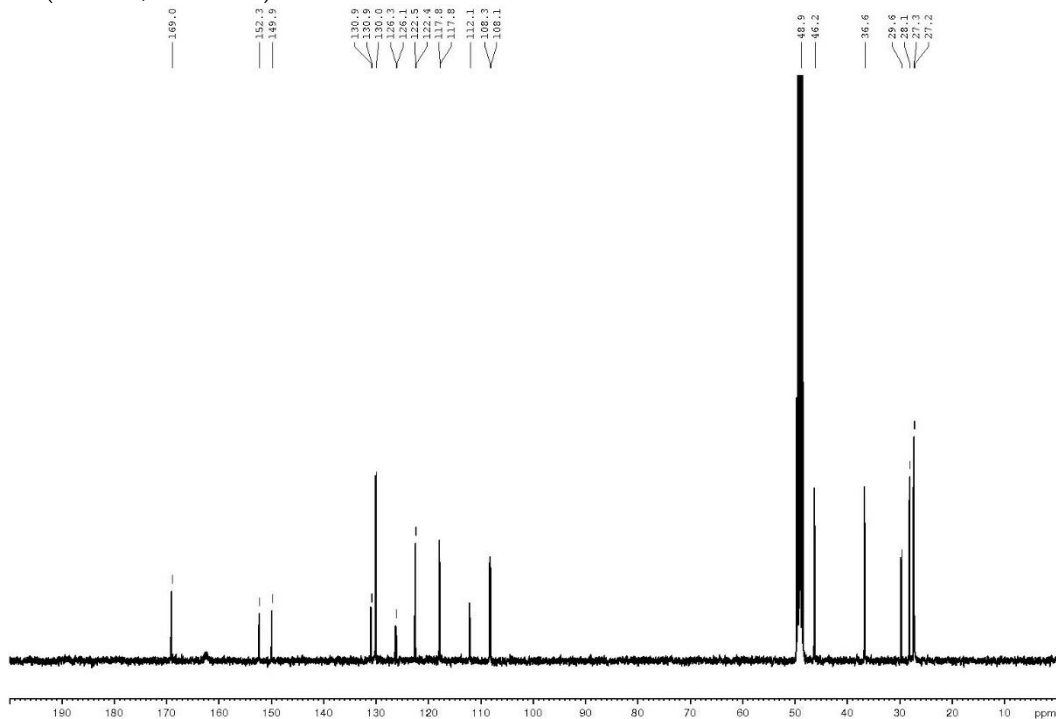

**Figure S26**  $^1\text{H}$  ( $\text{CD}_3\text{OD}$ , 400 MHz) and  $^{13}\text{C}$  ( $\text{CD}_3\text{OD}$ , 100 MHz) NMR spectra for **16c**

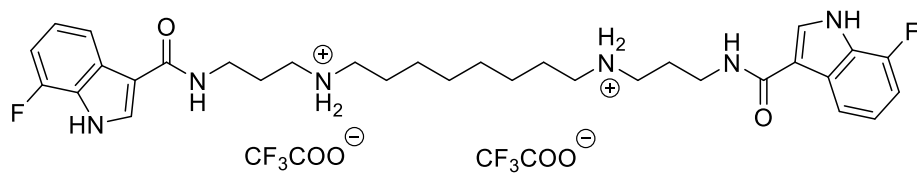

$^1\text{H}$  NMR ( $\text{CD}_3\text{OD}$ , 400 MHz):

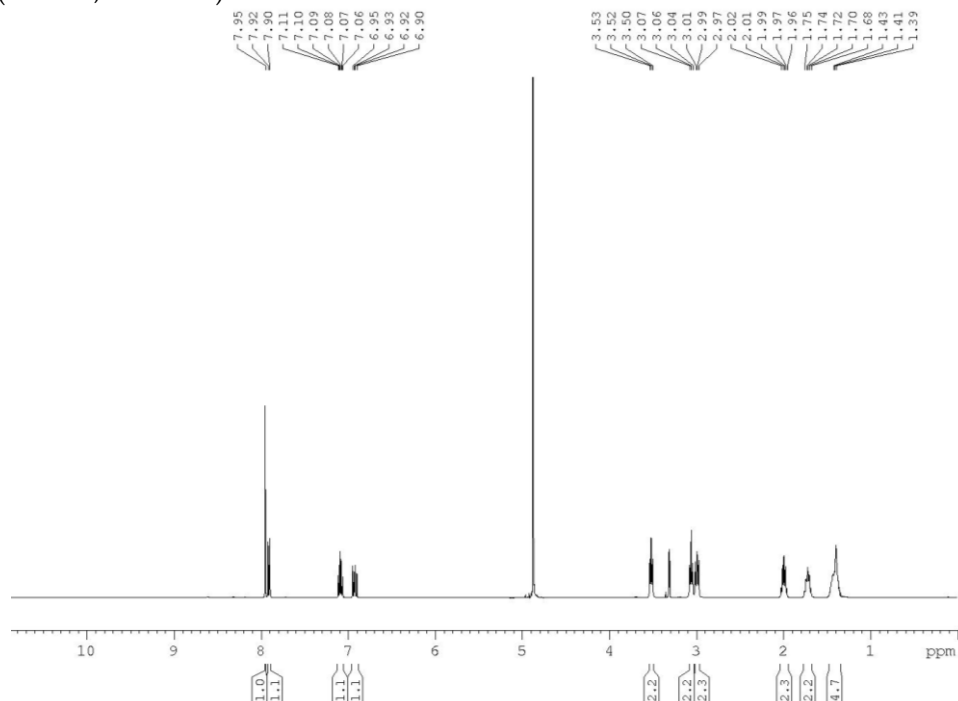

$^{13}\text{C}$  NMR ( $\text{CD}_3\text{OD}$ , 100 MHz):

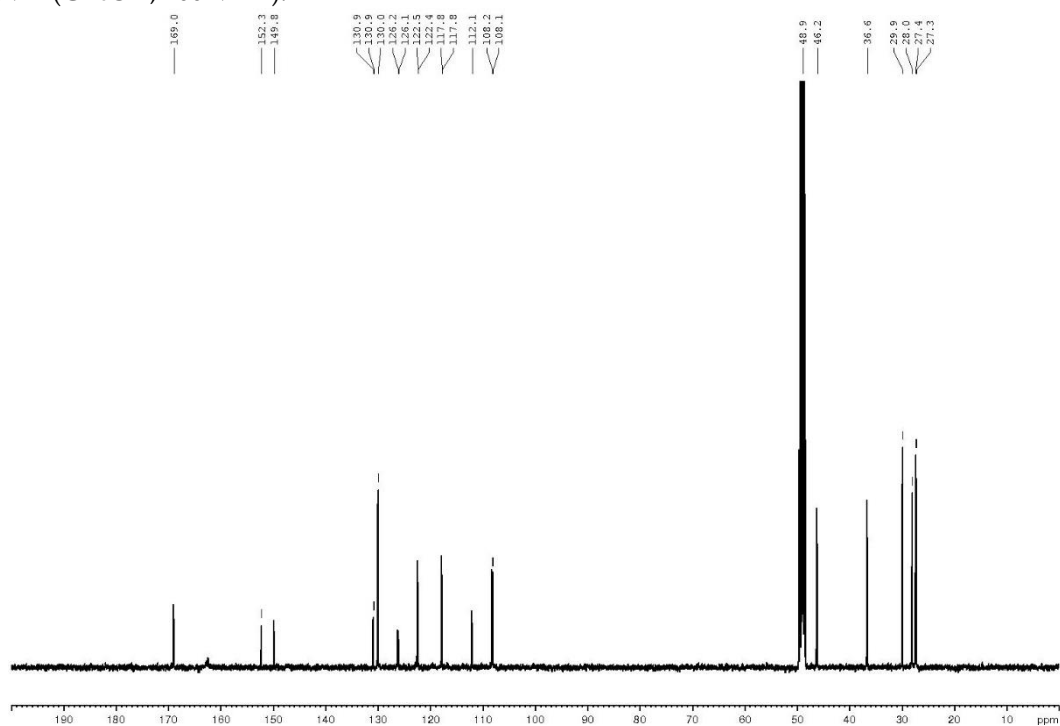

**Figure S27**  $^1\text{H}$  ( $\text{CD}_3\text{OD}$ , 400 MHz) and  $^{13}\text{C}$  ( $\text{CD}_3\text{OD}$ , 100 MHz) NMR spectra for **16d**

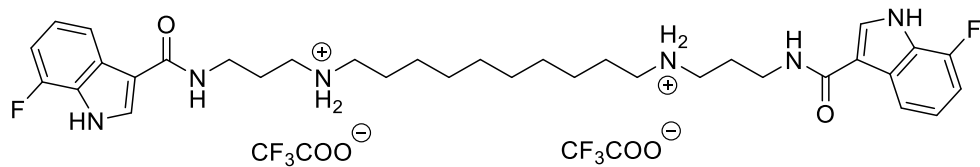

$^1\text{H}$  NMR ( $\text{CD}_3\text{OD}$ , 400 MHz):

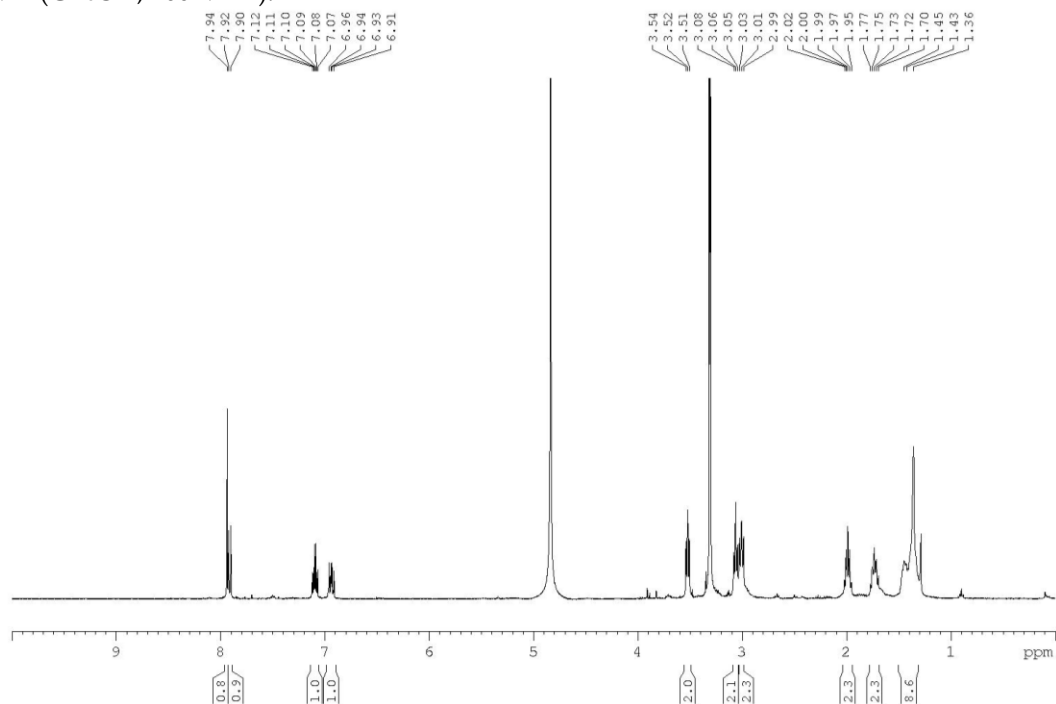

$^{13}\text{C}$  NMR ( $\text{CD}_3\text{OD}$ , 100 MHz):

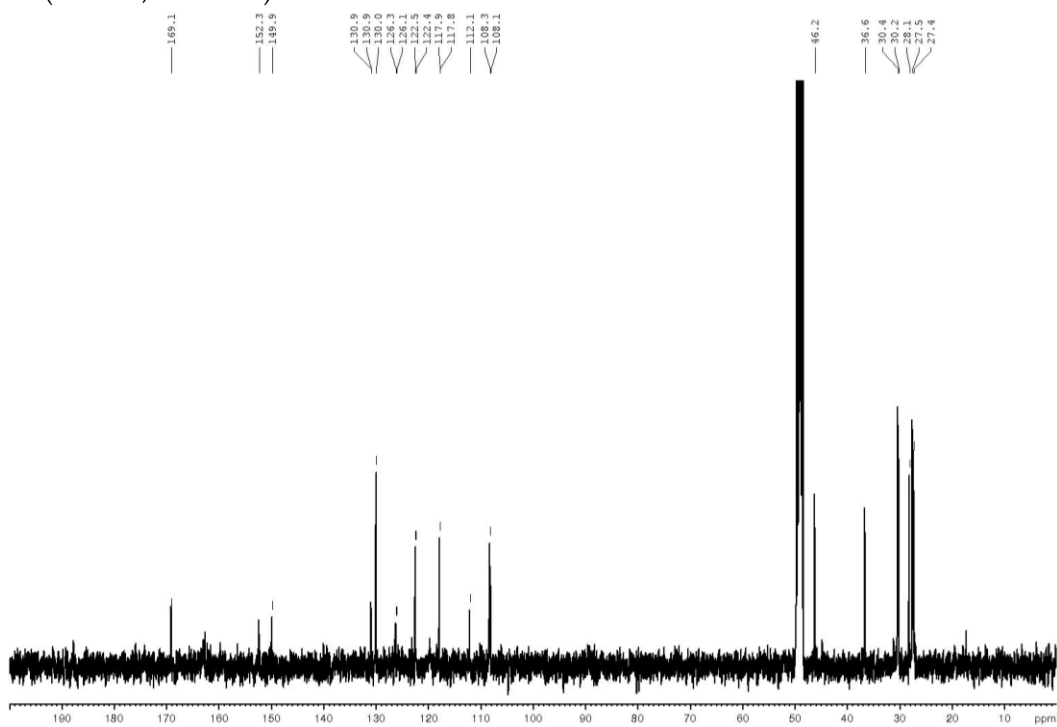

**Figure S28**  $^1\text{H}$  ( $\text{CD}_3\text{OD}$ , 400 MHz) and  $^{13}\text{C}$  ( $\text{CD}_3\text{OD}$ , 100 MHz) NMR spectra for **16e**

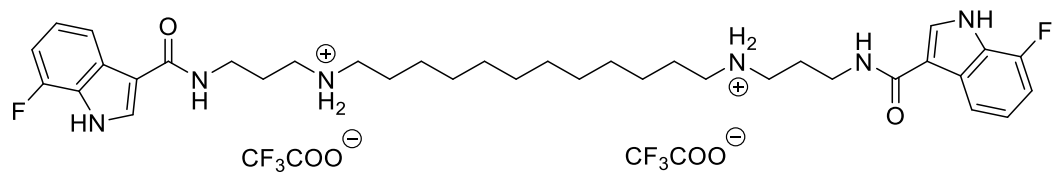

$^1\text{H}$  NMR ( $\text{CD}_3\text{OD}$ , 400 MHz):

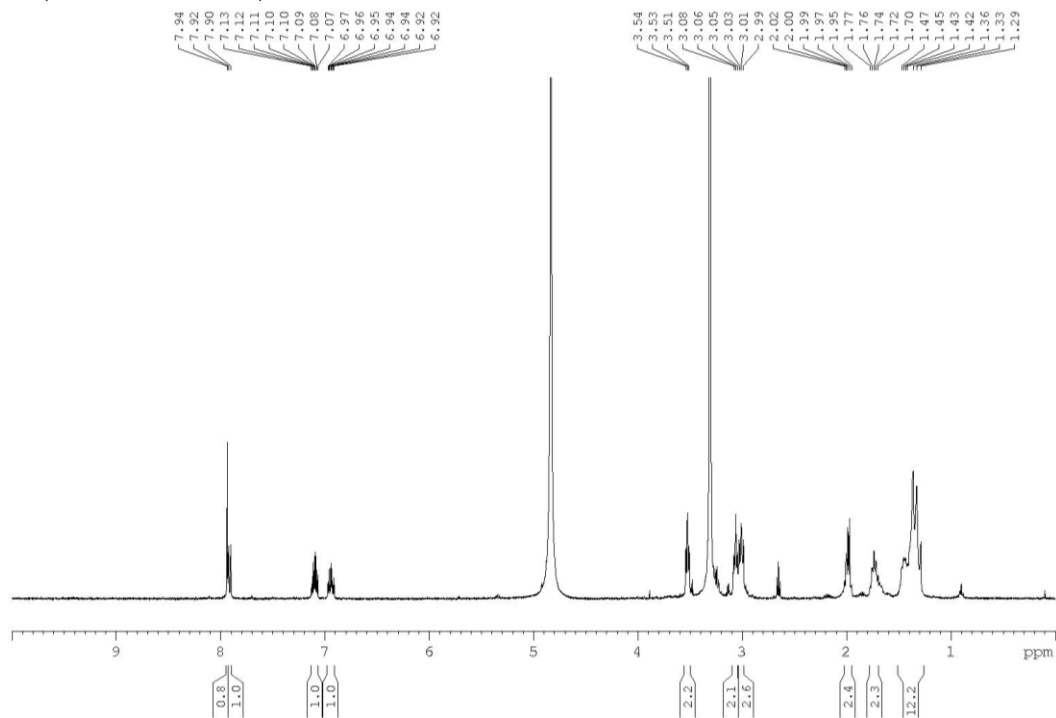

$^{13}\text{C}$  NMR ( $\text{CD}_3\text{OD}$ , 100 MHz):

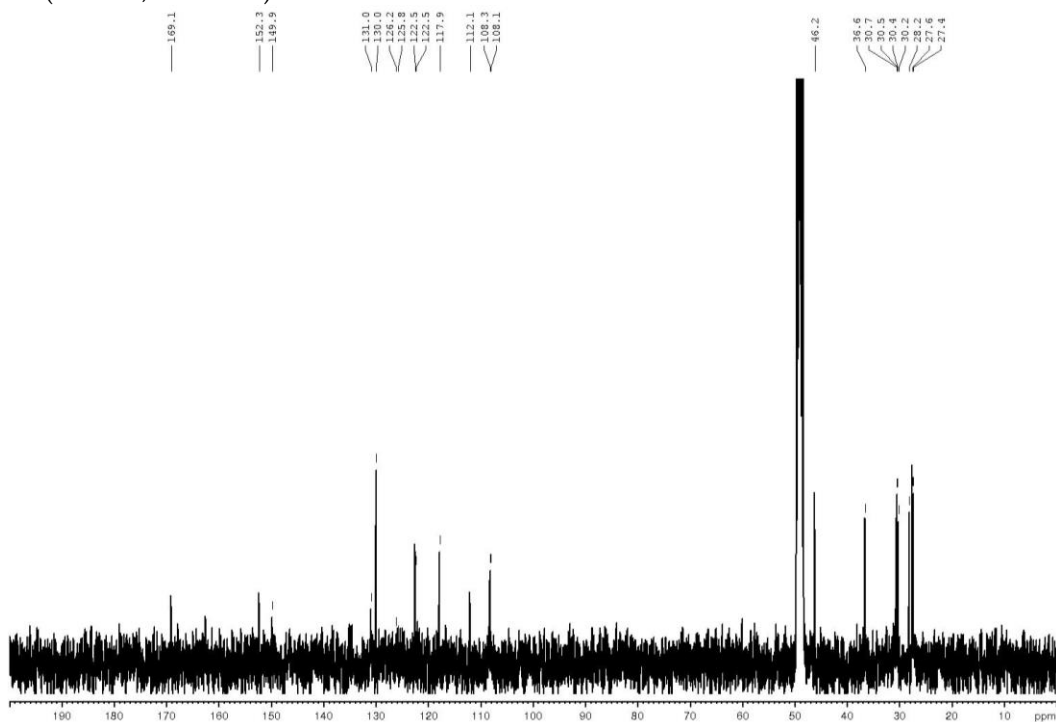

**Figure S29**  $^1\text{H}$  ( $\text{CD}_3\text{OD}$ , 400 MHz) and  $^{13}\text{C}$  ( $\text{CD}_3\text{OD}$ , 100 MHz) NMR spectra for **16f**

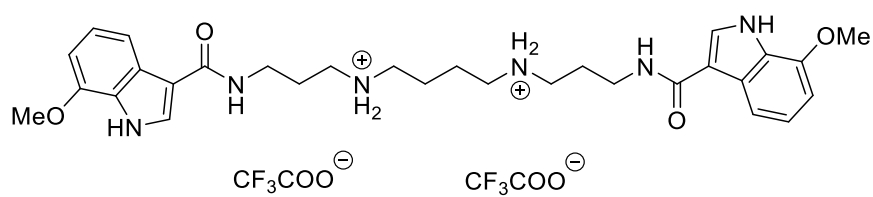

$^1\text{H}$  NMR ( $\text{CD}_3\text{OD}$ , 400 MHz):

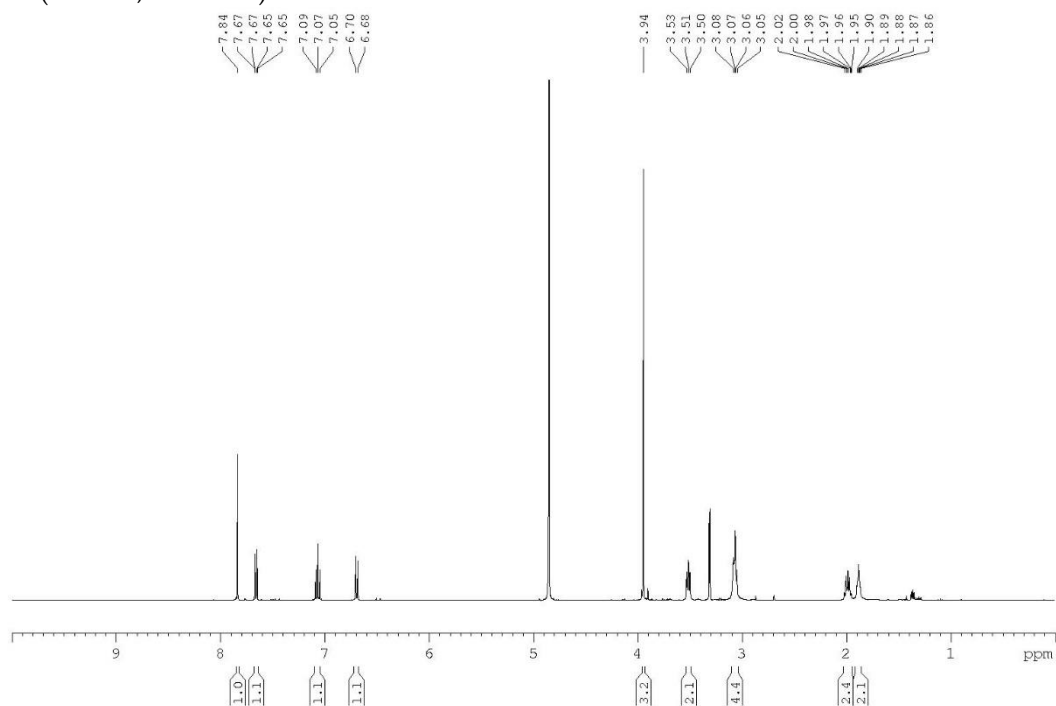

$^{13}\text{C}$  NMR ( $\text{CD}_3\text{OD}$ , 100 MHz):

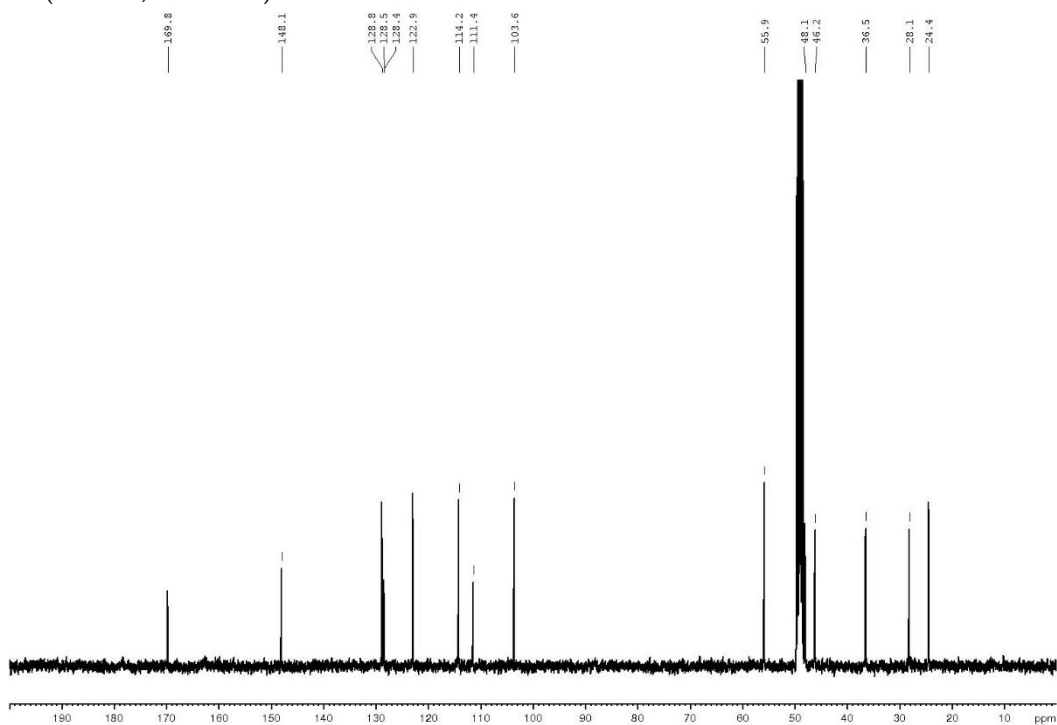

**Figure S30**  $^1\text{H}$  ( $\text{CD}_3\text{OD}$ , 400 MHz) and  $^{13}\text{C}$  ( $\text{CD}_3\text{OD}$ , 100 MHz) NMR spectra for **17a**



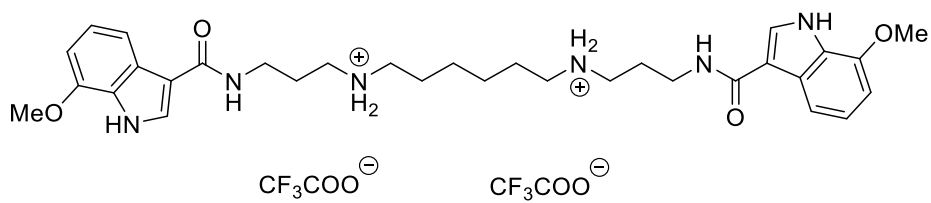

$^1\text{H}$  NMR ( $\text{CD}_3\text{OD}$ , 400 MHz):

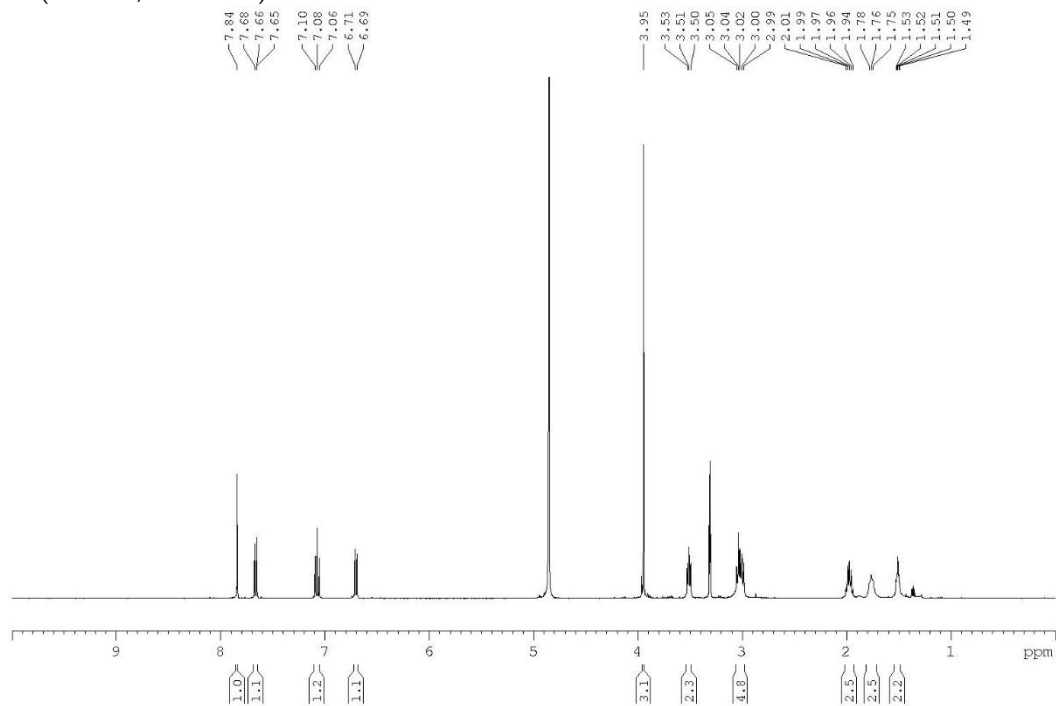

$^{13}\text{C}$  NMR ( $\text{CD}_3\text{OD}$ , 100 MHz):

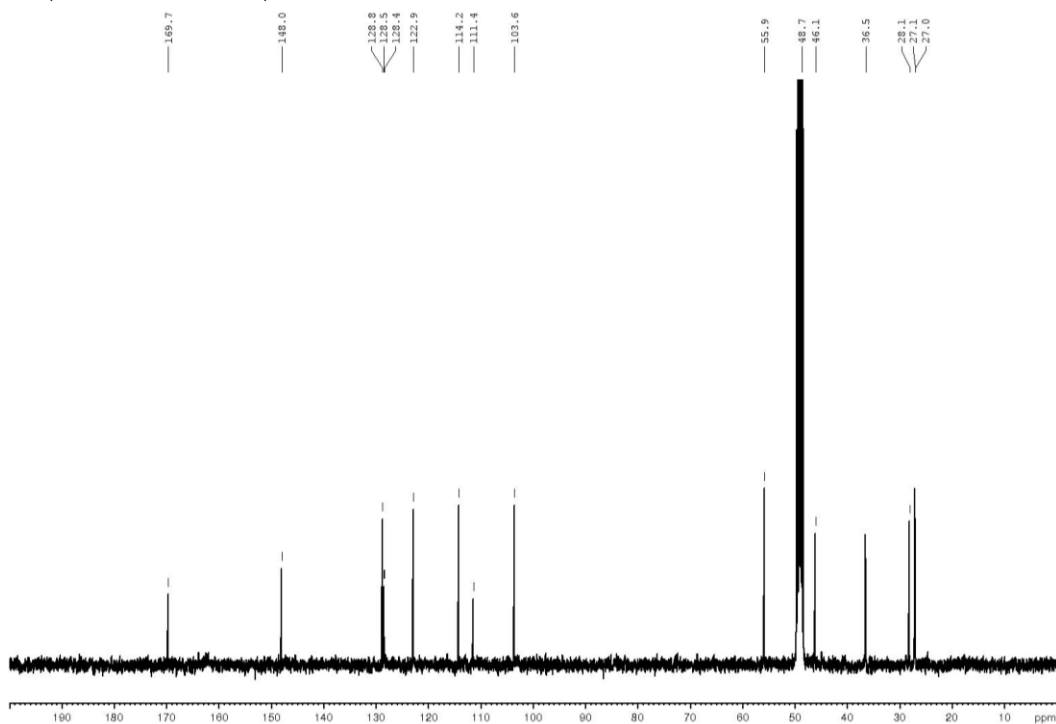

**Figure S31**  $^1\text{H}$  ( $\text{CD}_3\text{OD}$ , 400 MHz) and  $^{13}\text{C}$  ( $\text{CD}_3\text{OD}$ , 100 MHz) NMR spectra for **17b**

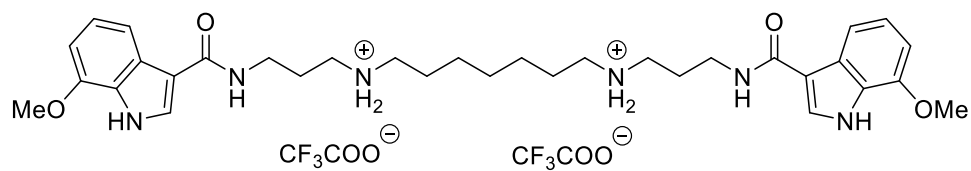

$^1\text{H}$  NMR ( $\text{CD}_3\text{OD}$ , 400 MHz):

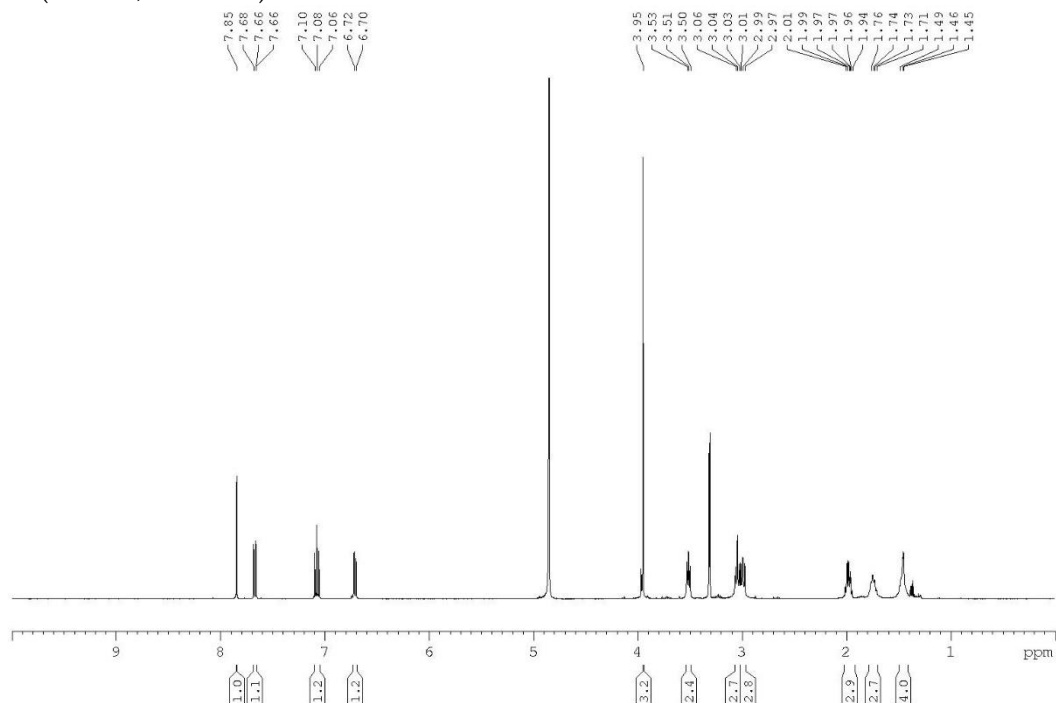

$^{13}\text{C}$  NMR ( $\text{CD}_3\text{OD}$ , 100 MHz):

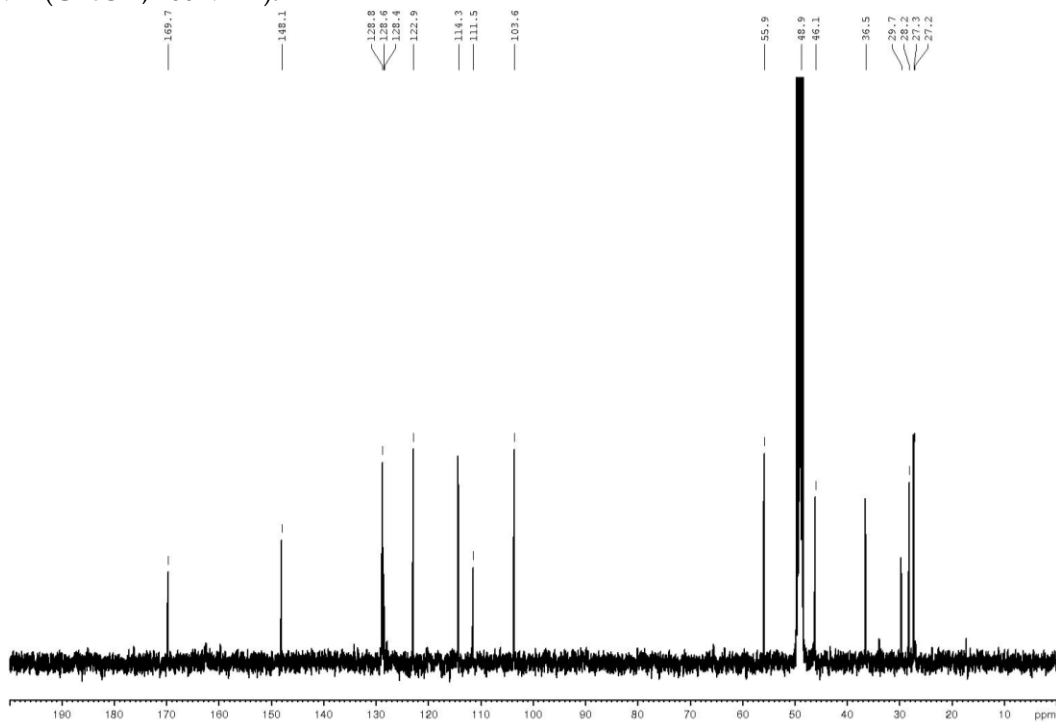

**Figure S32**  $^1\text{H}$  ( $\text{CD}_3\text{OD}$ , 400 MHz) and  $^{13}\text{C}$  ( $\text{CD}_3\text{OD}$ , 100 MHz) NMR spectra for **17c**

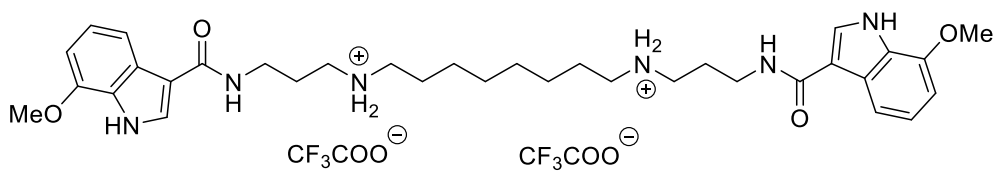

$^1\text{H}$  NMR ( $\text{CD}_3\text{OD}$ , 400 MHz):

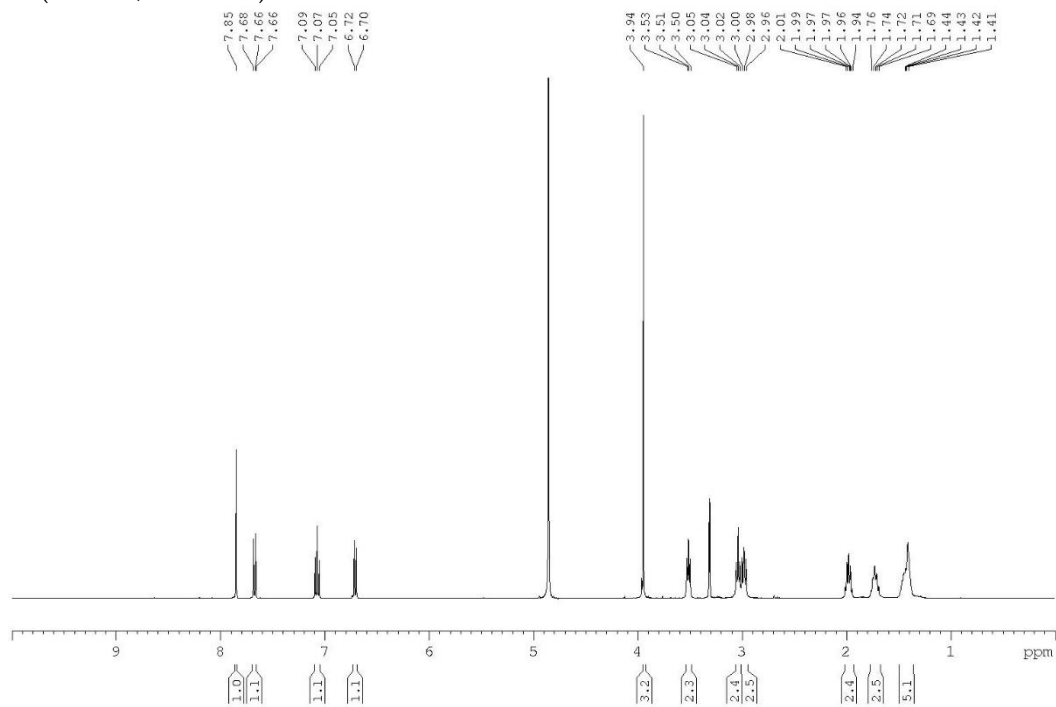

$^{13}\text{C}$  NMR ( $\text{CD}_3\text{OD}$ , 100 MHz):

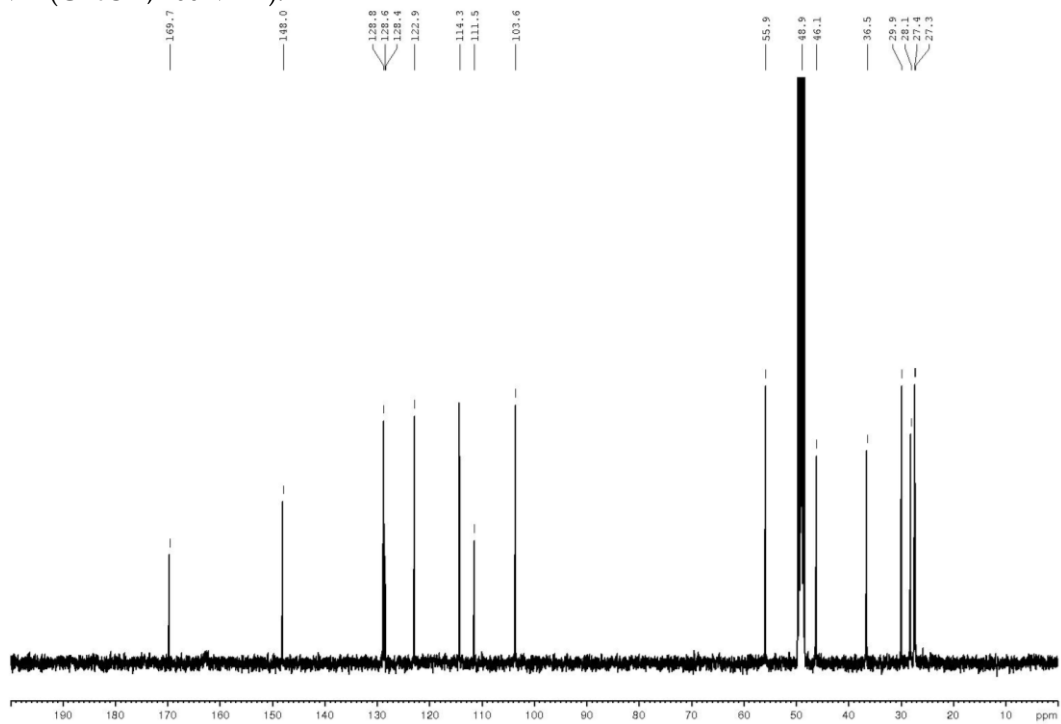

**Figure S33**  $^1\text{H}$  ( $\text{CD}_3\text{OD}$ , 400 MHz) and  $^{13}\text{C}$  ( $\text{CD}_3\text{OD}$ , 100 MHz) NMR spectra for **17d**

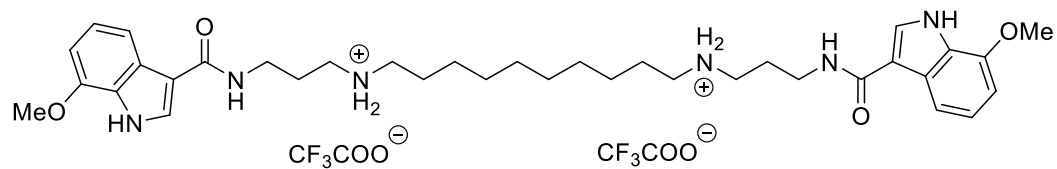

$^1\text{H}$  NMR ( $\text{CD}_3\text{OD}$ , 400 MHz):

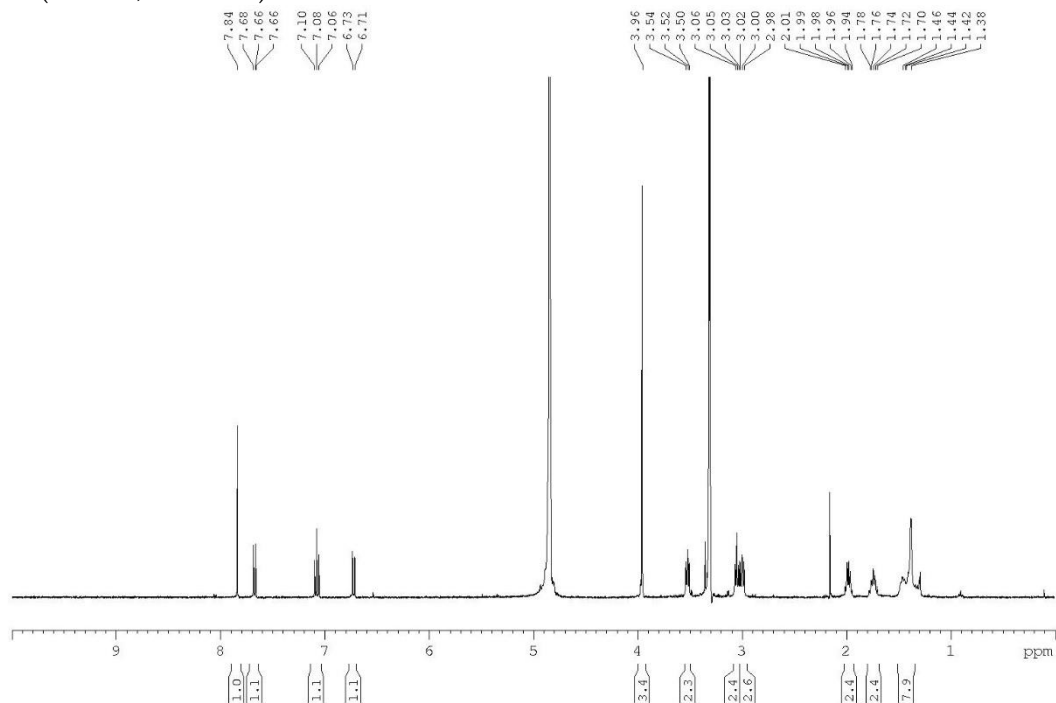

$^{13}\text{C}$  NMR ( $\text{CD}_3\text{OD}$ , 100 MHz):

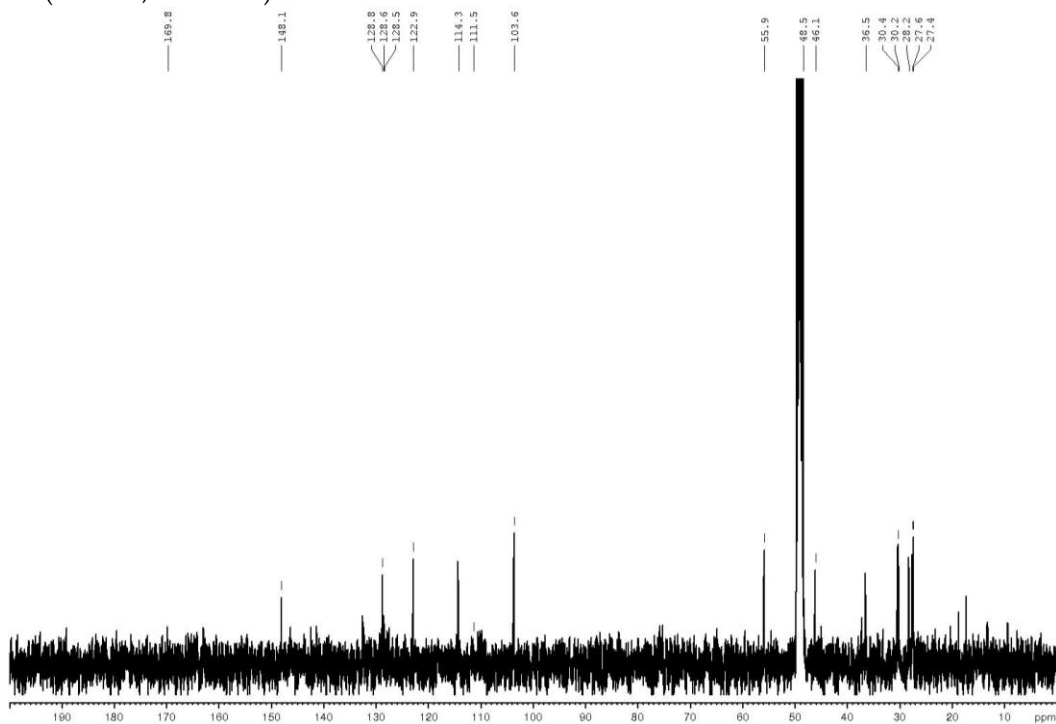

**Figure S34**  $^1\text{H}$  ( $\text{CD}_3\text{OD}$ , 400 MHz) and  $^{13}\text{C}$  ( $\text{CD}_3\text{OD}$ , 100 MHz) NMR spectra for **17e**

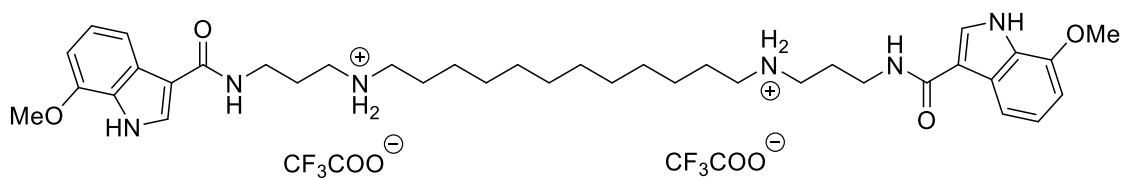

$^1\text{H}$  NMR ( $\text{CD}_3\text{OD}$ , 400 MHz):

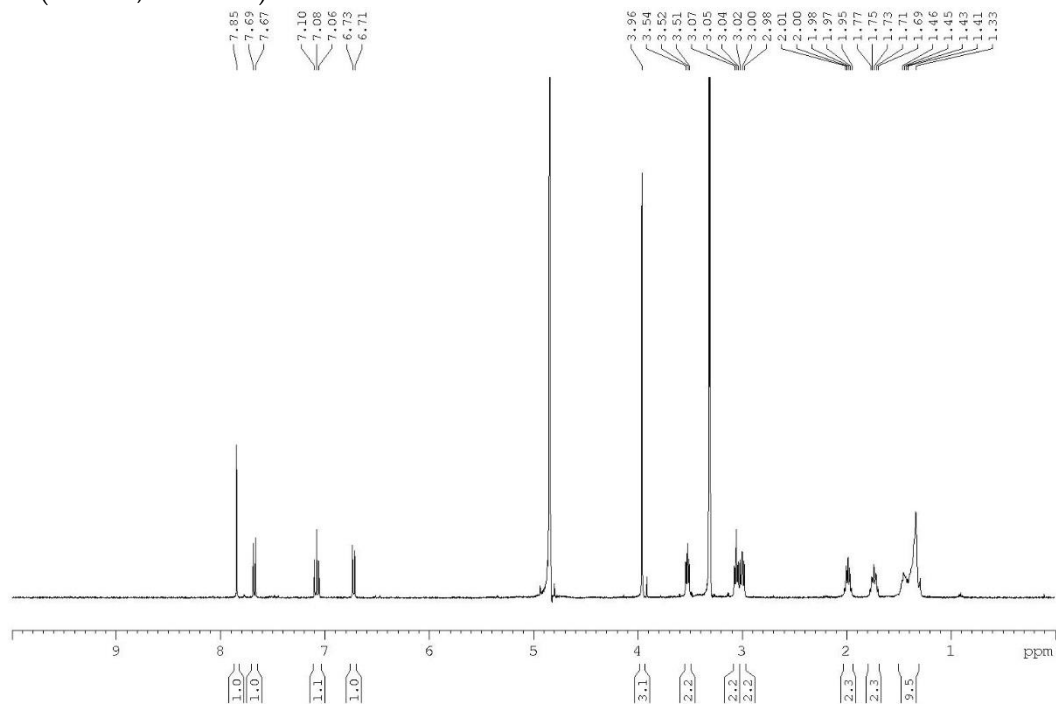

$^{13}\text{C}$  NMR ( $\text{CD}_3\text{OD}$ , 100 MHz):

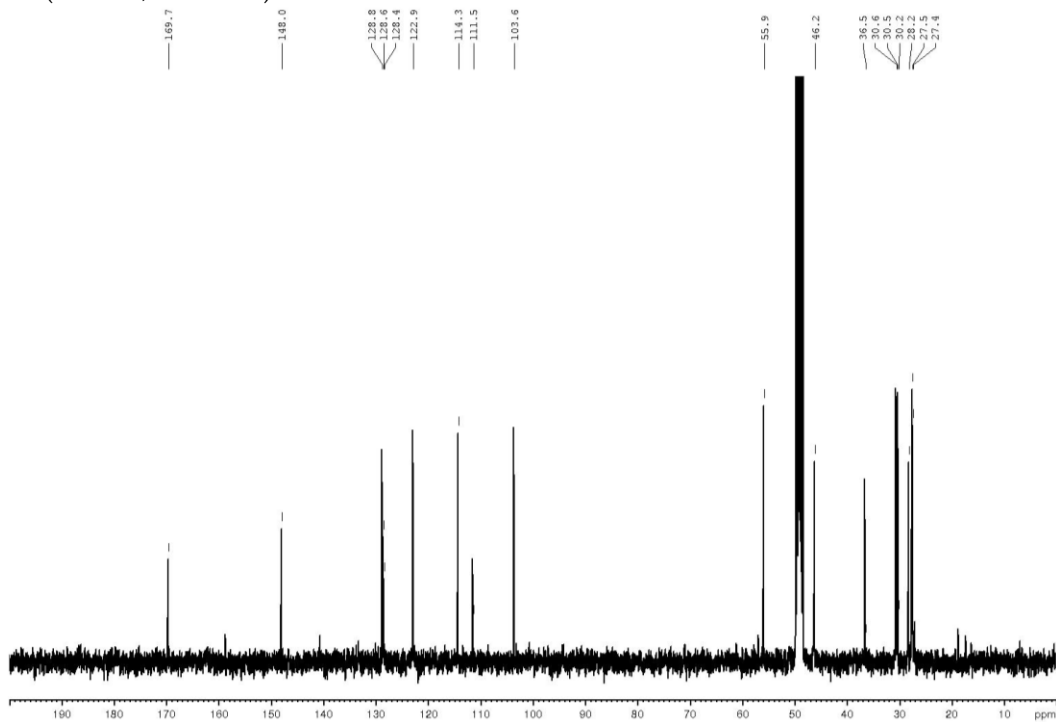

**Figure S35**  $^1\text{H}$  ( $\text{CD}_3\text{OD}$ , 400 MHz) and  $^{13}\text{C}$  ( $\text{CD}_3\text{OD}$ , 100 MHz) NMR spectra for **17f**

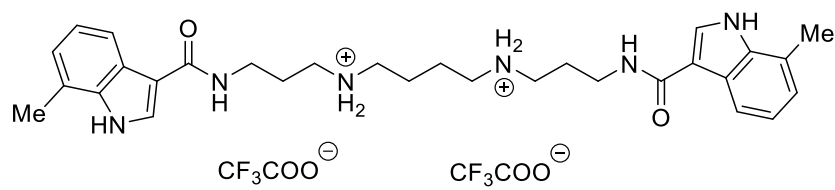

$^1\text{H}$  NMR ( $\text{CD}_3\text{OD}$ , 400 MHz):

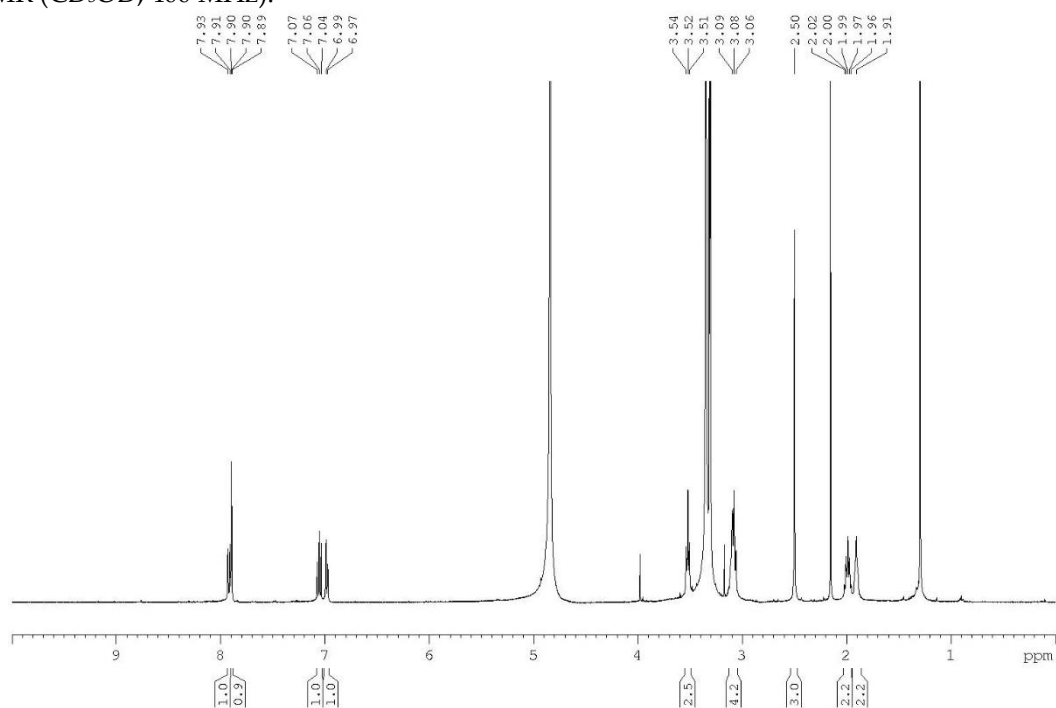

$^{13}\text{C}$  NMR ( $\text{CD}_3\text{OD}$ , 100 MHz):

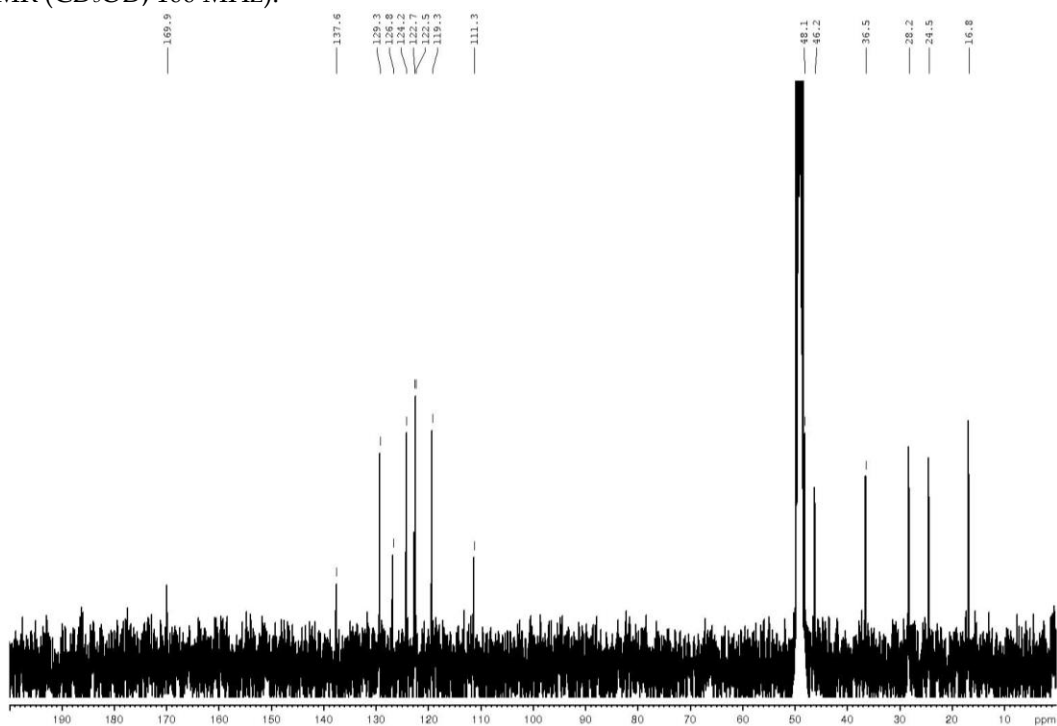

**Figure S36**  $^1\text{H}$  ( $\text{CD}_3\text{OD}$ , 400 MHz) and  $^{13}\text{C}$  ( $\text{CD}_3\text{OD}$ , 100 MHz) NMR spectra for **18a**

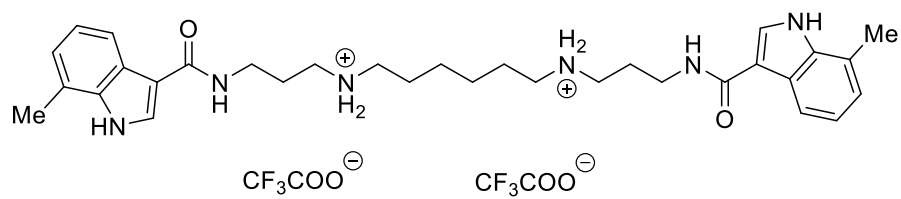

$^1\text{H}$  NMR ( $\text{CD}_3\text{OD}$ , 400 MHz):

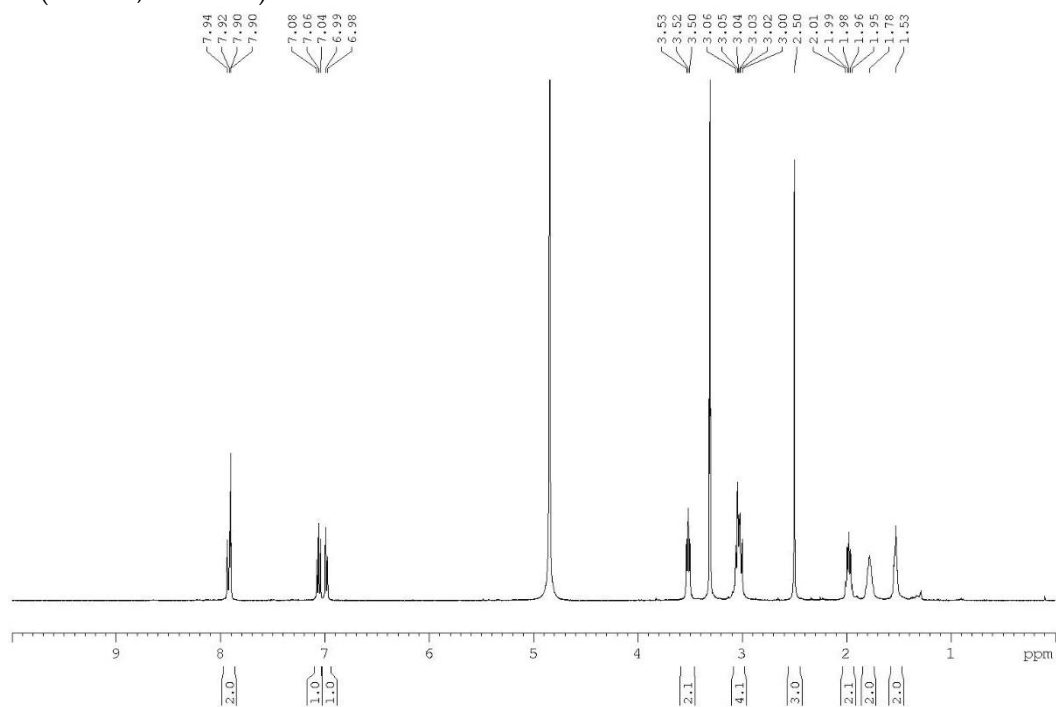

$^{13}\text{C}$  NMR ( $\text{CD}_3\text{OD}$ , 100 MHz):

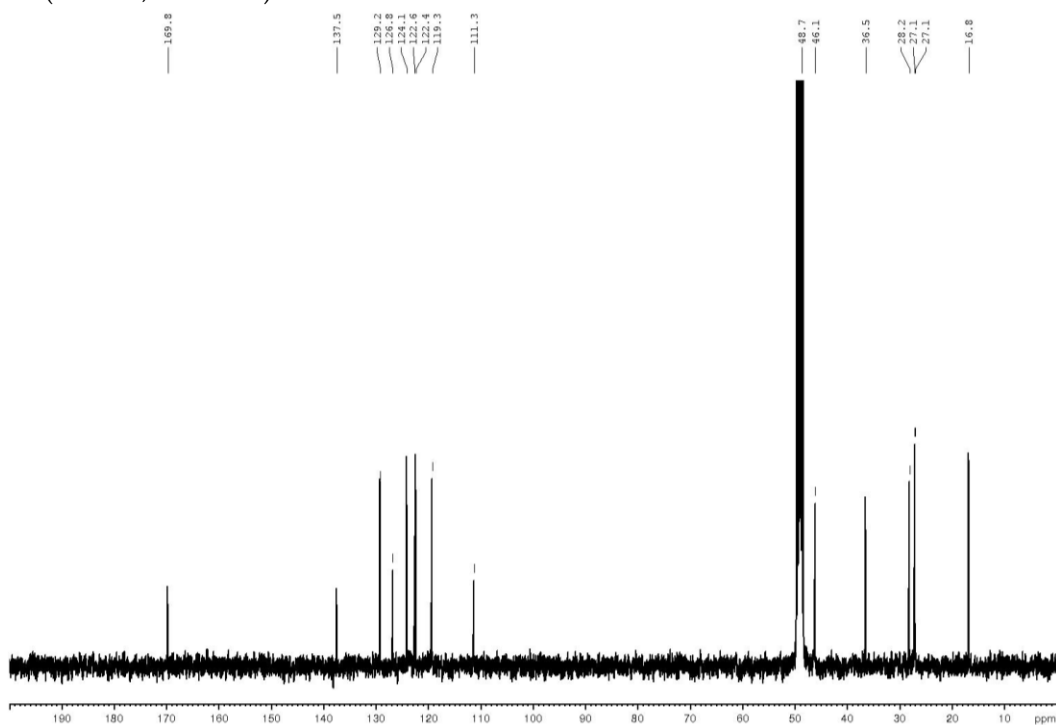

**Figure S37**  $^1\text{H}$  ( $\text{CD}_3\text{OD}$ , 400 MHz) and  $^{13}\text{C}$  ( $\text{CD}_3\text{OD}$ , 100 MHz) NMR spectra for **18b**

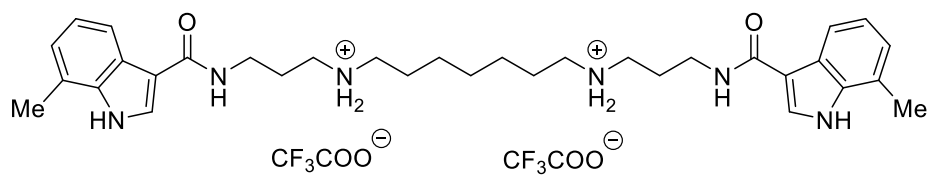

$^1\text{H}$  NMR ( $\text{CD}_3\text{OD}$ , 400 MHz):

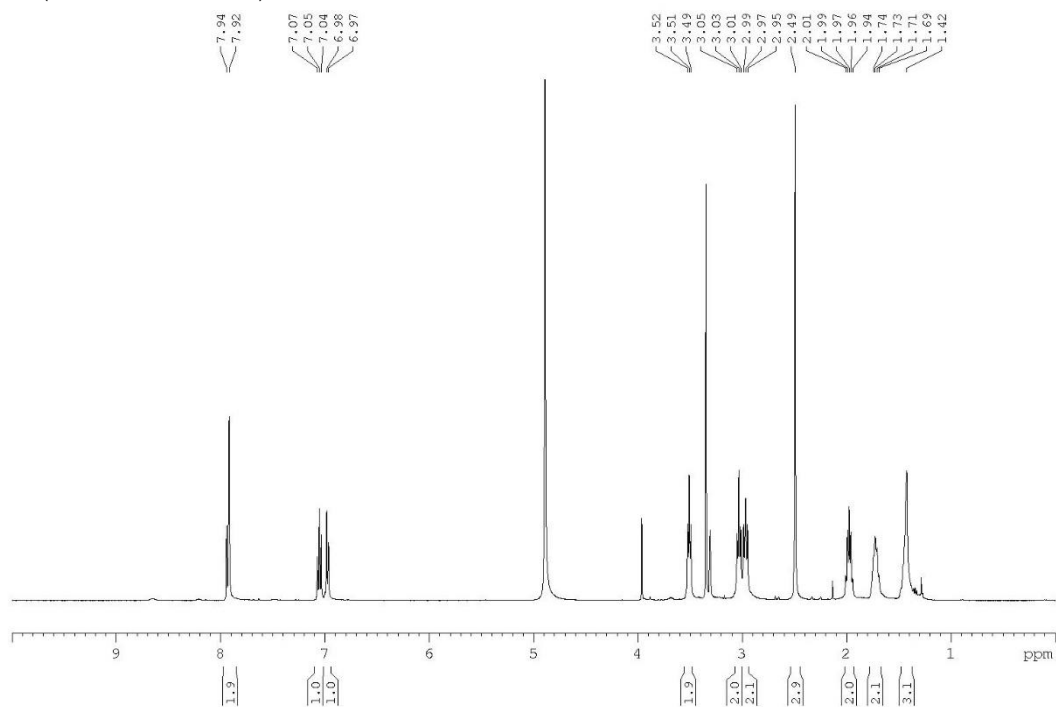

$^{13}\text{C}$  NMR ( $\text{CD}_3\text{OD}$ , 100 MHz):

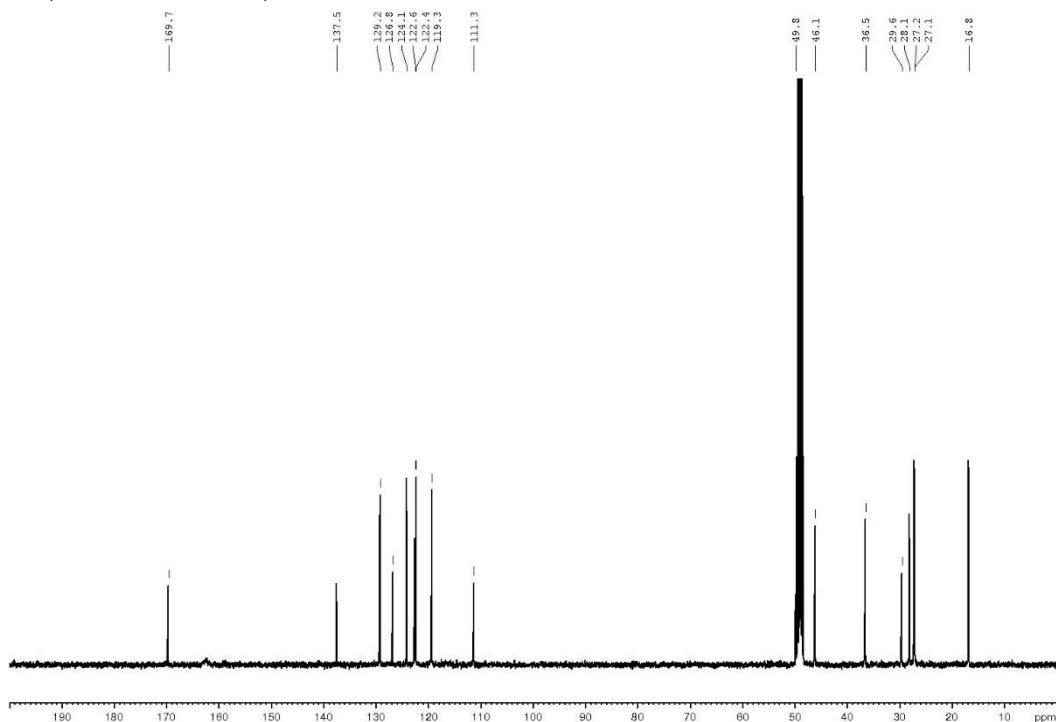

**Figure S38**  $^1\text{H}$  ( $\text{CD}_3\text{OD}$ , 400 MHz) and  $^{13}\text{C}$  ( $\text{CD}_3\text{OD}$ , 100 MHz) NMR spectra for **18c**



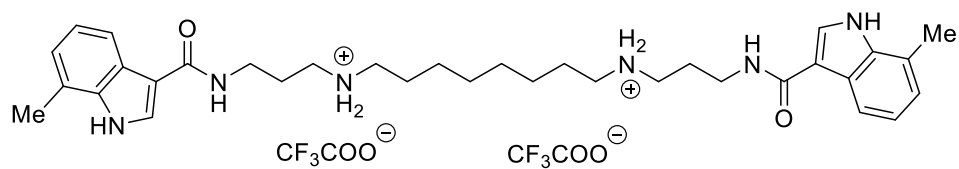

$^1\text{H}$  NMR ( $\text{CD}_3\text{OD}$ , 400 MHz):

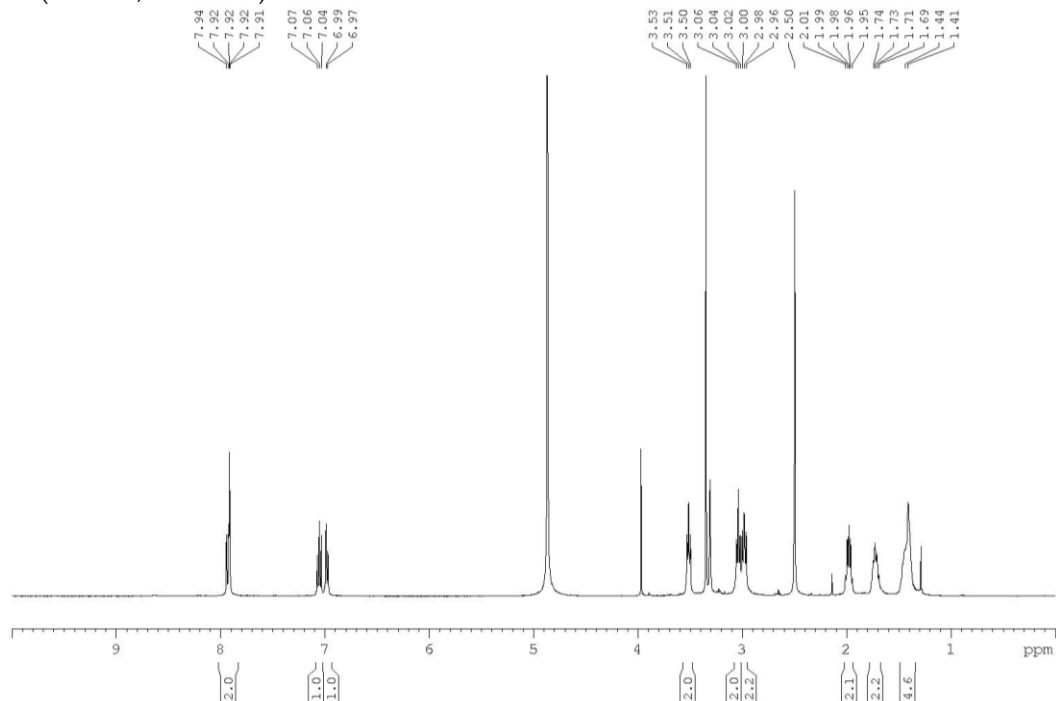

$^{13}\text{C}$  NMR ( $\text{CD}_3\text{OD}$ , 100 MHz):

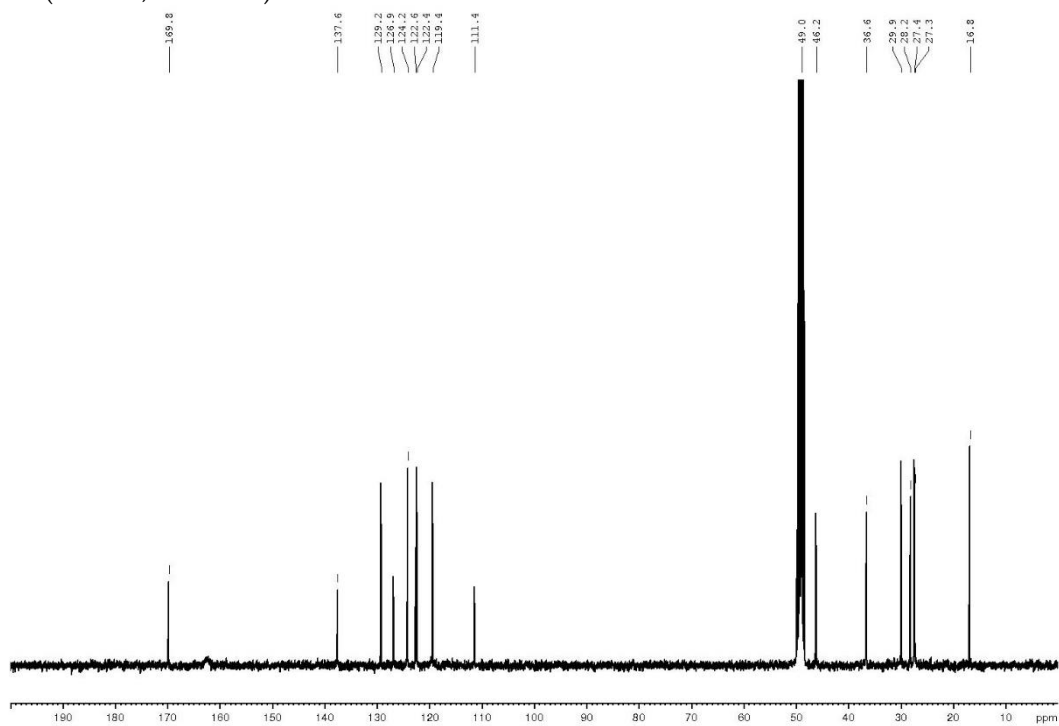

**Figure S39**  $^1\text{H}$  ( $\text{CD}_3\text{OD}$ , 400 MHz) and  $^{13}\text{C}$  ( $\text{CD}_3\text{OD}$ , 100 MHz) NMR spectra for **18d**

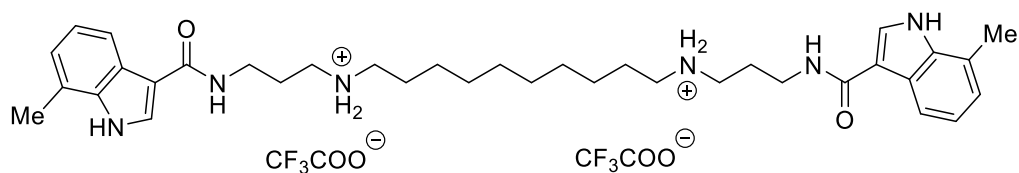

$^1\text{H}$  NMR ( $\text{CD}_3\text{OD}$ , 400 MHz):

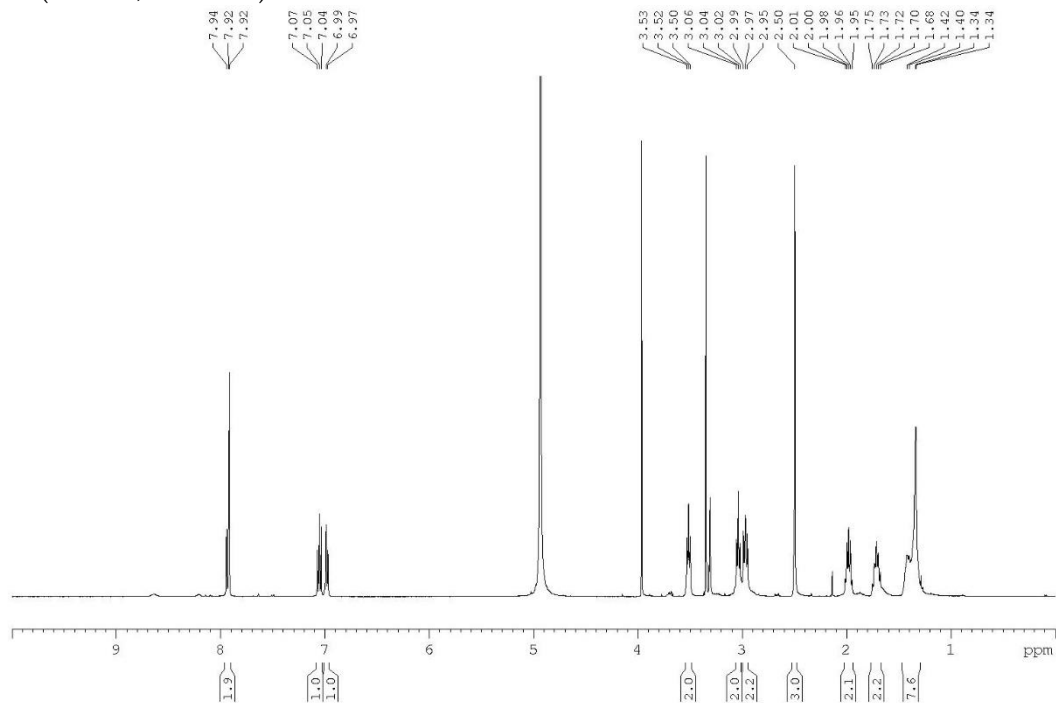

$^{13}\text{C}$  NMR ( $\text{CD}_3\text{OD}$ , 100 MHz):

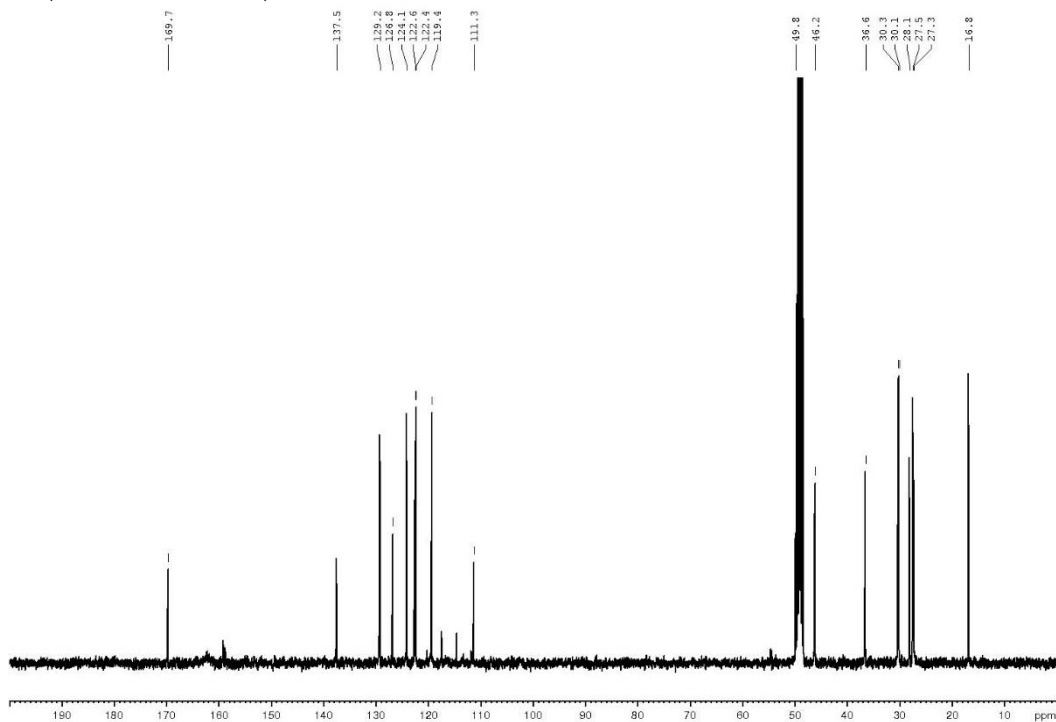

**Figure S40**  $^1\text{H}$  ( $\text{CD}_3\text{OD}$ , 400 MHz) and  $^{13}\text{C}$  ( $\text{CD}_3\text{OD}$ , 100 MHz) NMR spectra for **18e**

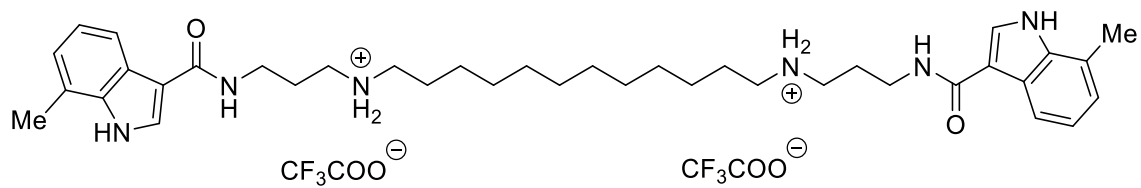

$^1\text{H}$  NMR ( $\text{CD}_3\text{OD}$ , 400 MHz):

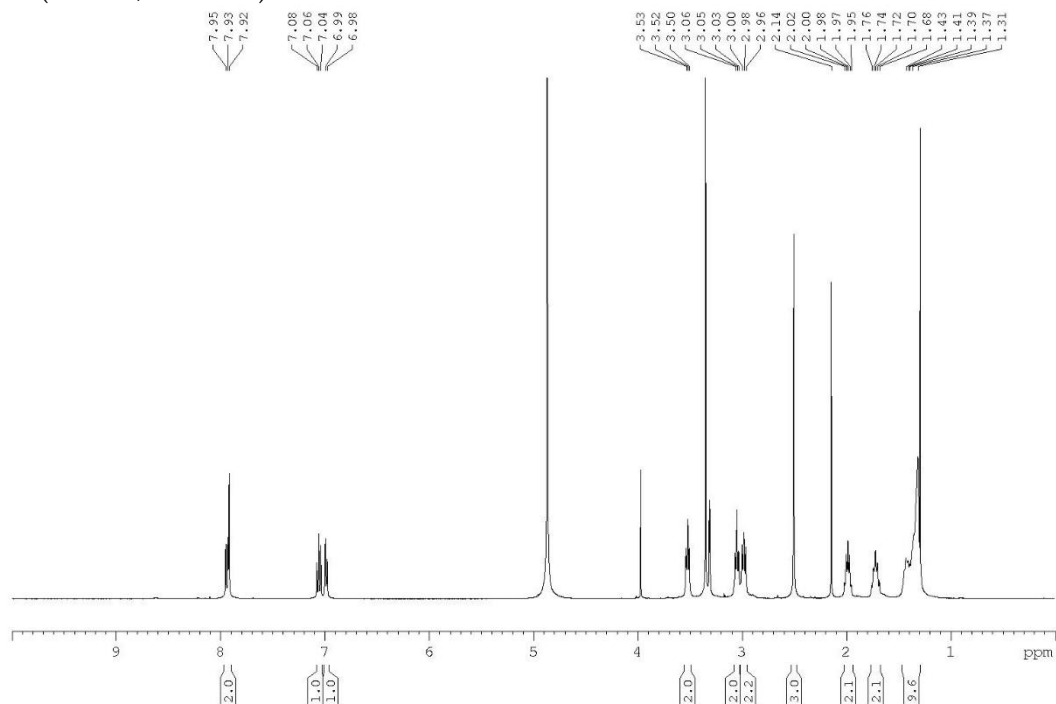

$^{13}\text{C}$  NMR ( $\text{CD}_3\text{OD}$ , 100 MHz):

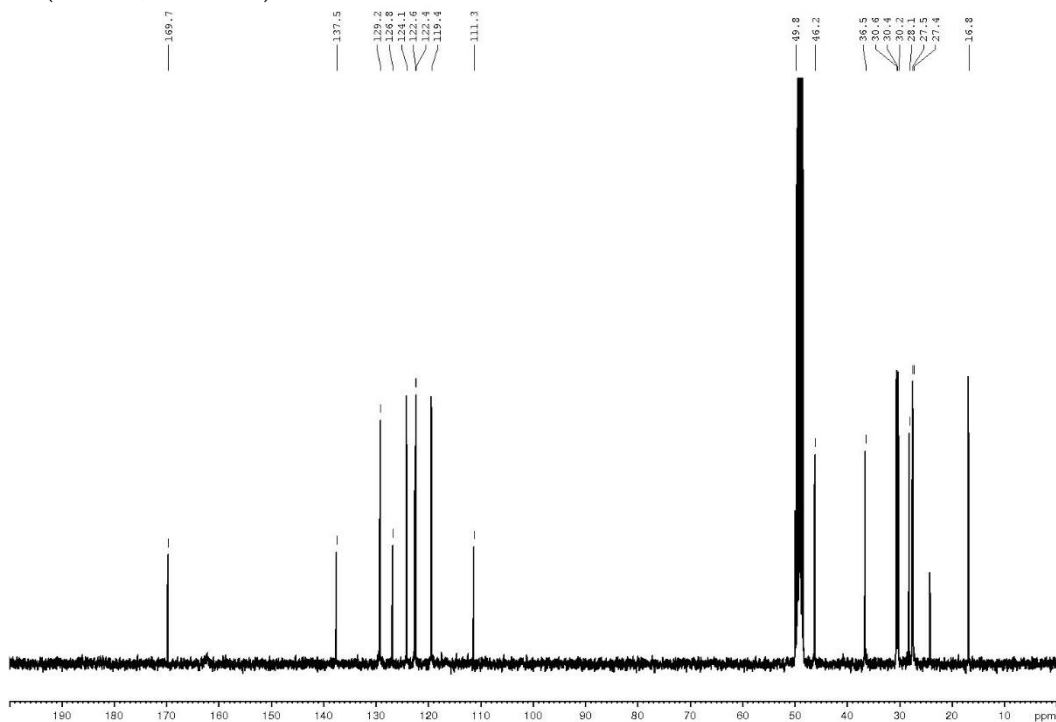

**Figure S41**  $^1\text{H}$  ( $\text{CD}_3\text{OD}$ , 400 MHz) and  $^{13}\text{C}$  ( $\text{CD}_3\text{OD}$ , 100 MHz) NMR spectra for **18f**
